# Supplementary material for: Hexahapto-chromium complexes of graphene: a theoretical study
Source: Royal Society of Chemistry journal article supplement (doi:10.1039/c4ra03702b), 2014-01-01
Supplement: c4ra03702b1.pdf [file c4ra03702b1.pdf]

# Hexahapto-Chromium Complexes of Graphene: A Theoretical Study

Song Liu,<sup>a</sup> Yu Lei,<sup>a,b</sup> Yingzi Li,<sup>a</sup> Tao Zhang,<sup>a</sup> Huan Wang,<sup>a</sup> and Yu Lan<sup>a,\*</sup>

<sup>a</sup> School of Chemistry and Chemical Engineering, Chongqing University, Chongqing, China.

<sup>b</sup> Department of Emergency, First Hospital, Jilin University, Changchun, China.

[lanyu@cqu.edu.cn](mailto:lanyu@cqu.edu.cn)

## Table of contents

|                                                                                  |         |
|----------------------------------------------------------------------------------|---------|
| 1. Completes reference for Gaussian 09.                                          | Page S2 |
| 2. Computational Methods.                                                        | Page S3 |
| 3. B3LYP and M11-L absolute calculation energies, enthalpies, and free energies. | Page S3 |
| 4. B3LYP geometries for all the optimized compounds and transition states.       | Page S6 |

### 1. Complete reference for Gaussian 09

Frisch, M. J.; Trucks, G. W.; Schlegel, H. B.; Scuseria, G. E.; Robb, M. A.; Cheeseman, J. R.; Scalmani, G.; Barone, V.; Mennucci, B.; Petersson, G. A.; Nakatsuji, H.; Caricato, M.; Li, X.; Hratchian, H. P.; Izmaylov, A. F.; Bloino, J.; Zheng, G.; Sonnenberg, J. L.; Hada, M.; Ehara, M.; Toyota, K.; Fukuda, R.; Hasegawa, J.; Ishida, M.; Nakajima, T.; Honda, Y.; Kitao, O.; Nakai, H.; Vreven, T.; Montgomery, Jr., J. A.; Peralta, J. E.; Ogliaro, F.; Bearpark, M.; Heyd, J. J.; Brothers, E.; Kudin, K. N.; Staroverov, V. N.; Keith, T.; Kobayashi, R.; Normand, J.; Raghavachari, K.; Rendell, A.; Burant, J. C.; Iyengar, S. S.; Tomasi, J.; Cossi, M.; Rega, N.; Millam, J. M.; Klene, M.; Knox, J. E.; Cross, J. B.; Bakken, V.; Adamo, C.; Jaramillo, J.; Gomperts, R.; Stratmann, R. E.; Yazyev, O.; Austin, A. J.; Cammi, R.; Pomelli, C.; Ochterski, J. W.; Martin, R. L.; Morokuma, K.; Zakrzewski, V. G.; Voth, G. A.; Salvador, P.; Dannenberg, J. J.; Dapprich, S.; Daniels, A. D.; Farkas, O.; Foresman, J. B.; Ortiz, J. V.; Cioslowski, J.; and Fox, D. J. Gaussian 09, revision D.01; Gaussian, Inc.: Wallingford, CT, 2013.

## 2. Computational Methods.

All the DFT calculations were carried out with the GAUSSIAN 09 series of programs.<sup>1</sup> Density functional theory B3LYP<sup>2</sup> with a standard 6-31G(d) basis set (SDD basis set for Cr) was used for geometry optimizations. Harmonic frequency calculations were performed for all stationary points to confirm them as a local minima or transition structures and to derive the thermochemical corrections for the enthalpies and free energies. M11-L functional,<sup>3</sup> recently proposed by Truhlar group, is used to calculate the single point energies, which could give more accuracy energetic information.<sup>4</sup> The larger basis set 6-311+G(d) (SDD basis set for Cr) is used in the solvation single point calculations. The energies given in this paper are B3LYP and M11-L calculated Gibbs free energies.

## 3. B3LYP and M11-L absolute calculation energies, enthalpies, and free energies.

| Geometry  | $E_{(\text{elec-B3LYP})}$ | $E_{(\text{elec-M11-L})}$ | $H_{(\text{gas phase-M11-L})}$ | $G_{(\text{gas phase-M11-L})}$ | IF* |
|-----------|---------------------------|---------------------------|--------------------------------|--------------------------------|-----|
| <b>1</b>  | -232.2438                 | -232.2427                 | -232.1366                      | -232.1694                      | -   |
| <b>2</b>  | -921.8786                 | -921.9019                 | -921.6065                      | -921.6612                      | -   |
| <b>3</b>  | -2068.9051                | -2068.9777                | -2068.4130                     | -2068.4981                     | -   |
| <b>4</b>  | -3673.3270                | -3673.4745                | -3672.5612                     | -3672.6865                     | -   |
| <b>5</b>  | -5735.1460                | -5735.3956                | -5734.0538                     | -5734.2276                     | -   |
| <b>6</b>  | -659.2859                 | -659.4289                 | -659.2882                      | -659.3377                      | -   |
| <b>7</b>  | -1348.8836                | -1349.0586                | -1348.7396                     | -1348.8016                     | -   |
| <b>8</b>  | -2495.9158                | -2496.1409                | -2495.5414                     | -2495.6429                     | -   |
| <b>9</b>  | -4100.3321                | -4100.6343                | -4099.6843                     | -4099.8288                     | -   |
| <b>10</b> | -6162.1537                | -6162.5588                | -6161.1800                     | -6161.3735                     | -   |

---

|                            |             |             |             |             |   |
|----------------------------|-------------|-------------|-------------|-------------|---|
| <b>11</b>                  | -551.4860   | -551.6380   | -551.4224   | -551.4690   | - |
| <b>12</b>                  | -1241.0724  | -1241.2638  | -1240.8600  | -1240.9286  | - |
| <b>13</b>                  | -2388.1124  | -2388.3522  | -2387.6784  | -2387.7782  | - |
| <b>14</b>                  | -3992.5253  | -3992.8425  | -3991.8206  | -3991.9607  | - |
| <b>15</b>                  | -6054.3511  | -6054.7674  | -6053.3156  | -6053.5034  | - |
| <b>16-H</b>                | -319.1331   | -319.2832   | -319.1766   | -319.2123   | - |
| <b>16-CH<sub>3</sub></b>   | -437.0744   | -437.2287   | -437.0364   | -437.0796   | - |
| <b>16-NH<sub>2</sub></b>   | -485.1680   | -485.3419   | -485.1827   | -485.2283   | - |
| <b>16-OMe</b>              | -662.6782   | -662.8161   | -662.6042   | -662.6617   | - |
| <b>16-F</b>                | -616.8198   | -616.9746   | -616.8900   | -616.9324   | - |
| <b>16-Cl</b>               | -1697.9079  | -1698.0783  | -1697.9966  | -1698.0430  | - |
| <b>16-Br</b>               | -8031.5453  | -8039.9545  | -8039.8734  | -8039.9238  | - |
| <b>16-CO<sub>2</sub>Me</b> | -1002.7700  | -1002.9173  | -1002.6670  | -1002.7369  | - |
| <b>16-CN</b>               | -595.8557   | -596.0174   | -595.9092   | -595.9587   | - |
| <b>17-H</b>                | -2388.1124  | -2388.3510  | -2387.6772  | -2387.7770  | - |
| <b>17-CH<sub>3</sub></b>   | -2506.0623  | -2506.3126  | -2505.5514  | -2505.6587  | - |
| <b>17-NH<sub>2</sub></b>   | -2554.1544  | -2554.4229  | -2553.6955  | -2553.8053  | - |
| <b>17-OMe</b>              | -2731.6648  | -2731.9045  | -2731.1248  | -2731.2418  | - |
| <b>17-F</b>                | -2685.8048  | -2686.0445  | -2685.3932  | -2685.5001  | - |
| <b>17-Cl</b>               | -3766.8793  | -3767.1471  | -3766.4997  | -3766.6051  | - |
| <b>17-Br</b>               | -10100.5146 | -10109.0204 | -10108.3738 | -10108.4828 | - |
| <b>17-CO<sub>2</sub>Me</b> | -3071.7421  | -3071.9931  | -3071.1762  | -3071.3067  | - |

---

---

|              |            |            |            |            |        |
|--------------|------------|------------|------------|------------|--------|
| <b>17-CN</b> | -2664.8321 | -2665.0898 | -2664.4160 | -2664.5248 | -      |
| <b>18</b>    | -4788.7351 | -4789.0748 | -4787.9614 | -4788.1251 | -      |
| <b>18-c</b>  | -5215.7375 | -5216.2333 | -5215.0840 | -5215.2659 | -      |
| <b>18-d</b>  | -5215.7406 | -5216.2355 | -5215.0866 | -5215.2700 | -      |
| <b>18-e</b>  | -5215.7423 | -5216.2372 | -5215.0879 | -5215.2712 | -      |
| <b>18-f</b>  | -5215.7433 | -5216.2377 | -5215.0890 | -5215.2723 | -      |
| <b>19</b>    | -4680.9298 | -4681.2844 | -4680.0982 | -4680.2538 | -      |
| <b>19-c</b>  | -5000.1230 | -5000.6435 | -4999.3468 | -4999.5183 | -      |
| <b>19-d</b>  | -5000.1331 | -5000.6553 | -4999.3610 | -4999.5289 | -      |
| <b>19-e</b>  | -5000.1351 |            |            |            | -      |
| <b>19-f</b>  | -5000.1338 | -5000.6578 | -4999.3636 | -4999.5314 | -      |
| <b>20</b>    |            |            |            |            | -      |
| <b>21</b>    | -2954.4864 | -2954.7333 | -2954.0305 | -2954.1475 | -      |
| <b>22-ts</b> | -2954.4680 | -2954.7131 | -2954.0108 | -2954.1280 | -66.64 |
| <b>23</b>    | -2954.4692 | -2954.7143 | -2954.0112 | -2954.1302 | -      |
| <b>24-ts</b> | -2954.4680 | -2954.7131 | -2954.0108 | -2954.1280 | -66.64 |
| <b>25</b>    | -2954.4864 | -2954.7333 | -2954.0305 | -2954.1475 | -      |

---

\* IF: The imaginary frequencies for the transition states.

#### 4. B3LYP geometries for all the optimized compounds and transition states.

|          |             |             |             |          |             |             |             |
|----------|-------------|-------------|-------------|----------|-------------|-------------|-------------|
| <b>1</b> |             |             |             | C        | 1.61861500  | 3.38157700  | -0.00001700 |
| C        | 0.49813700  | -1.30511000 | -0.00010200 | C        | 0.30413100  | 2.83357800  | -0.00002600 |
| C        | 1.37936900  | -0.22139500 | 0.00001800  | C        | -2.11940600 | 3.09248400  | 0.00000700  |
| C        | -0.88138700 | -1.08377100 | 0.00006900  | C        | -0.86413600 | 3.64803700  | -0.00001500 |
| C        | 0.88130100  | 1.08386900  | 0.00007700  | H        | 3.72279500  | 3.01024000  | 0.00004000  |
| H        | 2.45272600  | -0.39331300 | -0.00016700 | H        | 1.73245600  | 4.46303200  | -0.00003900 |
| C        | -1.37946200 | 0.22125100  | -0.00001800 | H        | -0.74589900 | 4.72905600  | -0.00004200 |
| H        | -1.56708000 | -1.92726500 | -0.00013400 | H        | -2.99908500 | 3.73179300  | 0.00002500  |
| C        | -0.49794500 | 1.30515600  | -0.00008400 |          |             |             |             |
| H        | 1.56716000  | 1.92717700  | 0.00003700  | <b>3</b> |             |             |             |
| H        | -2.45273000 | 0.39346200  | 0.00015100  | C        | -0.49019000 | 1.33248800  | -0.00115200 |
| H        | -0.88545400 | 2.32076800  | 0.00004900  | C        | 0.90890900  | 1.09079300  | 0.00108700  |
| H        | 0.88530200  | -2.32082600 | 0.00030800  | C        | -1.39917500 | 0.24172600  | 0.00109800  |
|          |             |             |             | C        | 1.39918700  | -0.24173200 | -0.00112400 |
| <b>2</b> |             |             |             | C        | -0.90887500 | -1.09081200 | -0.00107700 |
| C        | 0.15235100  | 1.41956900  | -0.00001400 | C        | 0.49017200  | -1.33248500 | 0.00108500  |
| C        | -1.15325600 | 0.84177100  | -0.00000800 | C        | 2.80765700  | -0.48509900 | 0.00052600  |
| C        | 1.30564100  | 0.57786000  | -0.00000200 | C        | 3.71618900  | 0.60715100  | -0.00026800 |
| C        | -1.30564000 | -0.57786400 | -0.00001100 | C        | 1.82407100  | 2.18877100  | -0.00062200 |
| C        | 1.15325100  | -0.84176900 | -0.00000600 | C        | 3.22365700  | 1.94567300  | 0.00015500  |
| C        | -0.15234700 | -1.41956600 | 0.00000300  | C        | -1.82405300 | -2.18880500 | 0.00055800  |
| C        | -2.60605900 | -1.15339500 | -0.00001300 | C        | -3.22365000 | -1.94571700 | -0.00017600 |
| C        | -3.73793800 | -0.28916400 | 0.00000400  | C        | -2.80764300 | 0.48509400  | -0.00054300 |
| C        | -2.30200100 | 1.68010900  | 0.00001500  | C        | -3.71619600 | -0.60718900 | 0.00023600  |
| C        | -3.59148100 | 1.07570000  | 0.00002400  | C        | 3.29698200  | -1.81882900 | -0.00021200 |
| H        | -4.46846500 | 1.71870700  | 0.00005700  | C        | 2.38385600  | -2.91450300 | 0.00022300  |
| H        | -4.73139300 | -0.73141000 | -0.00000600 | C        | 0.98374500  | -2.67393600 | -0.00052100 |
| C        | 2.30201100  | -1.68011500 | -0.00001900 | C        | -1.33223800 | -3.52170200 | -0.00018800 |
| C        | 3.59147400  | -1.07570400 | 0.00000300  | C        | 0.07324100  | -3.76443200 | 0.00022000  |
| C        | 2.60606500  | 1.15338800  | 0.00002200  | C        | -3.29696400 | 1.81881900  | 0.00022300  |
| C        | 3.73793000  | 0.28917300  | 0.00003300  | C        | -2.38386400 | 2.91452300  | -0.00022900 |
| H        | 4.46846600  | -1.71870400 | -0.00000400 | C        | -0.98375600 | 2.67392400  | 0.00056100  |
| H        | 4.73139600  | 0.73139300  | 0.00008500  | C        | 1.33223600  | 3.52172400  | 0.00020100  |
| C        | -2.72738900 | -2.57232100 | -0.00000500 | C        | -0.07326200 | 3.76447400  | -0.00023800 |
| C        | -1.61860900 | -3.38157100 | 0.00001000  | C        | 0.57228100  | -5.10552000 | 0.00000300  |
| C        | -0.30413700 | -2.83358900 | 0.00001500  | C        | -0.37682500 | -6.18489200 | -0.00005200 |
| H        | -3.72277900 | -3.01026000 | -0.00002400 | C        | -1.72058600 | -5.95274900 | 0.00005100  |
| H        | -1.73248100 | -4.46302100 | 0.00002900  | C        | -4.13569800 | -3.04851300 | -0.00001400 |
| C        | 2.11940200  | -3.09248100 | -0.00002300 | C        | -5.54494800 | -2.76613400 | 0.00003400  |
| C        | 0.86413800  | -3.64803500 | 0.00000100  | C        | -3.62929600 | -4.35534400 | 0.00009800  |
| H        | 0.74593100  | -4.72906000 | 0.00000700  | C        | -5.12529600 | -0.35815100 | -0.00000700 |
| H        | 2.99906100  | -3.73181900 | -0.00006000 | C        | -6.01574500 | -1.48631500 | -0.00007400 |
| C        | 2.72738900  | 2.57233600  | 0.00001100  | C        | -2.25239300 | -4.61739300 | 0.00000700  |

|   |             |             |             |   |             |             |             |
|---|-------------|-------------|-------------|---|-------------|-------------|-------------|
| H | 0.00237900  | -7.20399500 | 0.00003100  | C | -0.71122200 | -1.23337600 | 0.00154300  |
| H | -2.41967900 | -6.78554700 | -0.00004400 | C | -1.42383700 | -0.00084600 | -0.00155100 |
| H | -4.32551500 | -5.19159100 | -0.00004000 | C | -1.42323600 | 2.46174100  | -0.00111200 |
| H | -6.23819100 | -3.60386800 | -0.00006000 | C | -0.71088400 | 3.69497700  | 0.00061900  |
| H | -7.08659200 | -1.29748400 | -0.00001200 | C | 1.42050100  | 2.46337300  | 0.00106700  |
| C | 5.12533200  | 0.35807900  | -0.00000800 | C | 0.70679800  | 3.69570900  | -0.00070200 |
| C | 6.01579200  | 1.48629300  | 0.00003900  | C | -1.42050300 | -2.46340000 | -0.00102600 |
| C | -0.57226900 | 5.10560900  | 0.00003500  | C | -0.70681900 | -3.69571900 | 0.00065000  |
| C | 0.37682300  | 6.18491800  | 0.00010500  | C | 1.42323400  | -2.46171500 | 0.00111300  |
| C | 4.13570700  | 3.04851800  | -0.00002200 | C | 0.71088300  | -3.69493900 | -0.00062200 |
| C | 5.54500800  | 2.76608500  | -0.00007800 | C | -2.84748200 | 2.45990500  | 0.00065700  |
| C | 3.62934700  | 4.35528300  | -0.00012100 | C | -3.55564700 | 1.23182000  | -0.00067900 |
| C | 2.25236700  | 4.61741900  | -0.00001300 | C | -2.84380100 | -0.00160200 | 0.00106600  |
| C | 1.72061600  | 5.95272000  | -0.00002100 | C | -2.84478700 | -2.46308700 | 0.00064300  |
| H | 7.08663100  | 1.29741500  | -0.00002900 | C | -3.55430300 | -1.23589100 | -0.00064500 |
| H | 6.23825500  | 3.60381400  | 0.00001000  | C | 2.84748500  | -2.45989500 | -0.00067600 |
| H | 4.32555100  | 5.19153100  | 0.00002400  | C | 3.55565300  | -1.23181300 | 0.00073000  |
| H | 2.41967100  | 6.78556400  | 0.00009900  | C | 2.84378500  | 0.00160500  | -0.00112000 |
| H | -0.00225200 | 7.20408900  | 0.00005200  | C | 2.84475300  | 2.46305300  | -0.00069200 |
| C | 2.87277900  | -4.25933400 | 0.00000600  | C | 3.55427800  | 1.23586100  | 0.00070200  |
| C | 1.95727600  | -5.32048300 | -0.00010600 | C | -4.98233000 | -1.23597400 | 0.00032500  |
| C | 4.29525700  | -4.46627500 | -0.00003100 | C | -5.68913500 | -2.46782300 | 0.00002500  |
| C | 5.58662900  | -0.96535300 | 0.00013800  | C | -4.97793200 | -3.69799400 | -0.00001800 |
| C | 4.70790800  | -2.05709600 | 0.00003200  | C | -1.42067400 | -4.93239600 | -0.00031600 |
| C | 5.16819200  | -3.41876100 | 0.00009100  | C | -0.70720600 | -6.16035600 | -0.00001500 |
| H | 2.33290000  | -6.34169600 | 0.00000700  | C | -2.84362200 | -4.93106000 | -0.00007600 |
| H | 4.66696900  | -5.48810300 | 0.00005200  | C | 1.42603700  | -4.93080500 | 0.00033300  |
| H | 6.24039100  | -3.59981000 | 0.00002200  | C | 0.71394100  | -6.15963600 | 0.00002000  |
| H | 6.65890400  | -1.15064900 | 0.00005900  | C | -3.55758200 | -3.70035000 | -0.00030300 |
| C | -5.58659700 | 0.96535900  | -0.00013200 | C | -1.42602000 | 4.93083600  | -0.00035100 |
| C | -4.70792700 | 2.05704800  | -0.00001600 | C | -0.71391600 | 6.15963800  | -0.00003700 |
| C | -5.16822700 | 3.41876900  | -0.00006000 | C | 4.98231300  | 1.23594500  | -0.00034700 |
| C | -1.95737600 | 5.32056000  | 0.00015600  | C | 5.68912400  | 2.46780100  | 0.00000300  |
| C | -2.87279700 | 4.25942900  | 0.00003000  | C | 1.42065100  | 4.93237700  | 0.00030400  |
| C | -4.29537300 | 4.46631400  | 0.00007200  | C | 0.70719600  | 6.16034600  | -0.00002200 |
| H | -2.33297000 | 6.34179300  | 0.00006100  | C | 2.84362200  | 4.93104600  | 0.00005000  |
| H | -4.66710500 | 5.48815000  | 0.00000100  | C | 3.55755700  | 3.70033400  | 0.00032400  |
| H | -6.24043400 | 3.59973100  | 0.00001400  | C | 4.97791100  | 3.69799300  | 0.00000400  |
| H | -6.65888500 | 1.15059000  | -0.00004100 | C | -4.98367600 | 1.23051100  | 0.00031900  |
|   |             |             |             | C | -5.69268000 | -0.00314000 | 0.00005000  |
| 4 |             |             |             | C | -5.69183500 | 2.46154200  | 0.00002600  |
| C | 1.42384200  | 0.00085400  | 0.00159700  | C | -2.84898200 | 4.92801200  | -0.00005400 |
| C | 0.71123700  | 1.23335400  | -0.00158200 | C | -3.56159700 | 3.69637300  | -0.00031500 |
| C | 0.71263100  | -1.23258100 | -0.00154200 | C | -4.98193400 | 3.69257800  | 0.00000300  |
| C | -0.71262500 | 1.23259400  | 0.00153900  | C | 2.84898100  | -4.92801000 | 0.00004900  |

|   |             |             |             |          |             |             |             |
|---|-------------|-------------|-------------|----------|-------------|-------------|-------------|
| C | 3.56158600  | -3.69636200 | 0.00032900  | H        | 3.36782400  | 8.32484900  | 0.00015500  |
| C | 4.98192900  | -3.69255900 | 0.00000600  | H        | 5.51876700  | 7.08477600  | 0.00019800  |
| C | 5.69269100  | 0.00314800  | -0.00002800 | C        | 7.13176000  | 4.90739400  | 0.00014000  |
| C | 4.98366300  | -1.23051300 | -0.00033300 | C        | 7.81208300  | 3.73049100  | -0.00005800 |
| C | 5.69182000  | -2.46155200 | -0.00000800 | H        | 7.67071800  | 5.85171700  | 0.00017500  |
| C | -3.56627200 | 6.16874100  | -0.00019400 | H        | 8.89936200  | 3.72621200  | 0.00000600  |
| C | -4.98249100 | 6.13648900  | -0.00027300 | C        | 7.81621500  | -3.72202100 | -0.00008900 |
| C | -2.83160300 | 7.37980700  | -0.00031200 | C        | 7.13704800  | -4.89959100 | 0.00007600  |
| C | -7.12595900 | -0.00381800 | 0.00021600  | H        | 8.90349900  | -3.71629200 | -0.00010000 |
| C | -7.80749300 | 1.23788400  | 0.00032100  | H        | 7.67698800  | -5.84332000 | 0.00007500  |
| C | -7.80613300 | -1.24635200 | 0.00031400  | C        | 0.68454500  | -8.62940900 | 0.00009200  |
| C | -3.55959600 | -6.17264700 | -0.00021500 | C        | -0.67491900 | -8.63009500 | -0.00011600 |
| C | -4.97590000 | -6.14188600 | -0.00031100 | H        | 1.23312400  | -9.56818800 | 0.00006300  |
| C | -2.82356200 | -7.38280200 | -0.00031000 | H        | -1.22227800 | -9.56953400 | -0.00011500 |
| C | 3.56626400  | -6.16874300 | 0.00019600  | C        | -7.13181200 | -4.90743000 | -0.00011900 |
| C | 4.98252500  | -6.13649600 | 0.00029300  | C        | -7.81212900 | -3.73052800 | 0.00007500  |
| C | 2.83165200  | -7.37977400 | 0.00030400  | C        | -7.81619500 | 3.72204000  | 0.00011700  |
| C | 7.12598200  | 0.00384400  | -0.00019900 | C        | -7.13703300 | 4.89963000  | -0.00004800 |
| C | 7.80752800  | -1.23788500 | -0.00030600 | C        | -0.68451100 | 8.62942600  | -0.00011700 |
| C | 7.80611000  | 1.24631700  | -0.00029200 | C        | 0.67493600  | 8.63011900  | 0.00008500  |
| C | 3.55961300  | 6.17261400  | 0.00019600  | H        | -8.89939500 | -3.72624000 | 0.00003500  |
| C | 4.97589000  | 6.14191200  | 0.00029800  | H        | -7.67076800 | -5.85178900 | -0.00016000 |
| C | 2.82357000  | 7.38280100  | 0.00028800  | H        | -8.90347500 | 3.71630800  | 0.00013300  |
| C | -1.44140700 | 7.40050100  | -0.00010200 | H        | -7.67694900 | 5.84337700  | -0.00005000 |
| C | -5.69424300 | 4.94221900  | -0.00008300 | H        | 1.22228900  | 9.56955900  | 0.00007600  |
| H | -3.37693700 | 8.32126400  | -0.00020800 | H        | -1.23308200 | 9.56820100  | -0.00010200 |
| H | -5.52638600 | 7.07876400  | -0.00020400 |          |             |             |             |
| C | -7.13035800 | 2.45211300  | 0.00012500  | <b>5</b> |             |             |             |
| C | -7.12767800 | -2.45978000 | 0.00010700  | C        | 8.02639900  | -7.69800900 | -0.00115100 |
| H | -8.89544500 | 1.23624500  | 0.00028900  | C        | 6.59659500  | -7.48203700 | -0.00093100 |
| H | -8.89410500 | -1.24628300 | 0.00023400  | C        | 6.12045200  | -6.11916600 | -0.00062400 |
| C | -5.68896700 | -4.94848400 | -0.00011000 | C        | 7.03581700  | -5.04017400 | -0.00012500 |
| C | -1.43330700 | -7.40206000 | -0.00009200 | C        | 8.45818700  | -5.28749300 | -0.00017600 |
| H | -5.51873600 | -7.08474700 | -0.00024500 | C        | 8.90454000  | -6.66279500 | -0.00066800 |
| H | -3.36778100 | -8.32489000 | -0.00019700 | C        | 4.71940600  | -5.86962700 | -0.00078700 |
| C | 1.44142000  | -7.40046900 | 0.00008700  | C        | 6.56104200  | -3.69870400 | 0.00019600  |
| C | 5.69425100  | -4.94224500 | 0.00010500  | C        | 5.15750600  | -3.44465200 | -0.00069000 |
| H | 3.37695100  | -8.32122700 | 0.00018800  | C        | 4.23973800  | -4.52641900 | 0.00023300  |
| H | 5.52638900  | -7.07879900 | 0.00024900  | C        | 4.67865500  | -2.10152300 | 0.00142700  |
| C | 7.13040000  | -2.45207600 | -0.00011600 | C        | 5.59701800  | -1.01788900 | -0.00043600 |
| C | 7.12763900  | 2.45976700  | -0.00007200 | C        | 7.00395300  | -1.27375000 | 0.00075400  |
| H | 8.89547900  | -1.23620100 | -0.00026000 | C        | 7.47994200  | -2.61222400 | 0.00041100  |
| H | 8.89405400  | 1.24626700  | -0.00016200 | C        | 8.89453000  | -2.86721100 | 0.00060000  |
| C | 1.43334400  | 7.40207800  | 0.00005900  | C        | 9.33983700  | -4.22053200 | 0.00041900  |
| C | 5.68894600  | 4.94846600  | 0.00010200  | H        | 10.41044500 | -4.41391000 | 0.00055100  |



|   |             |             |             |   |             |             |             |
|---|-------------|-------------|-------------|---|-------------|-------------|-------------|
| H | 8.38739400  | -8.72359200 | -0.00171500 | C | -4.71937600 | 5.86969000  | 0.00024700  |
| H | 9.97526100  | -6.85159000 | -0.00102200 | C | -3.79720400 | 6.95329700  | 0.00027300  |
| C | 5.68758100  | -8.52579800 | -0.00135900 | C | -0.51920800 | 5.10234500  | 0.00169300  |
| C | 4.27963400  | -8.30721100 | -0.00108600 | C | -5.11909900 | -0.31970400 | -0.00152000 |
| C | 3.79720200  | -6.95326600 | -0.00094700 | C | -7.03584000 | 5.04016000  | -0.00046500 |
| H | 6.05301200  | -9.55052200 | -0.00118100 | C | -6.12044500 | 6.11918800  | -0.00008700 |
| C | 2.39891900  | -6.70198100 | -0.00100000 | C | -6.59660200 | 7.48199600  | -0.00005200 |
| C | 1.91690400  | -5.35570500 | 0.00046700  | C | -5.68747100 | 8.52583500  | 0.00039300  |
| C | 2.83641800  | -4.27307200 | -0.00160500 | C | -8.02626000 | 7.69795100  | -0.00016900 |
| C | 3.27887000  | -1.84754100 | -0.00202800 | C | -8.45814700 | 5.28749400  | -0.00061600 |
| C | 2.35751100  | -2.93351600 | 0.00222600  | C | -9.33984800 | 4.22039900  | -0.00106000 |
| C | 0.95899100  | -2.67940800 | -0.00279200 | C | -8.90446500 | 6.66265700  | -0.00057800 |
| C | 0.47886500  | -1.33803200 | 0.00380400  | C | -4.27967300 | 8.30726300  | 0.00034300  |
| C | 0.03923800  | -3.76315600 | 0.00233400  | C | -8.89458300 | 2.86723500  | -0.00089200 |
| C | -0.91943000 | -1.08374100 | -0.00335600 | C | 9.78328000  | -1.77916400 | 0.00110500  |
| C | -1.36196400 | -3.50833500 | -0.00219700 | C | 7.92083100  | -0.18846300 | 0.00072500  |
| C | -1.84116600 | -2.17016400 | 0.00316100  | C | 6.04021300  | 1.40825300  | -0.00010700 |
| C | 2.80008900  | -0.50924100 | 0.00318300  | C | 4.15952900  | 3.00080500  | -0.00100700 |
| C | 1.39832200  | -0.25430700 | -0.00316600 | C | 2.28274300  | 4.59279500  | -0.00120300 |
| C | 3.71951600  | 0.57479400  | -0.00176200 | C | 0.40469400  | 6.18850800  | -0.00053100 |
| C | 0.91941100  | 1.08375700  | 0.00394400  | C | -1.47752800 | 7.78341800  | 0.00032700  |
| C | 3.23959800  | 1.91563300  | 0.00264100  | C | -3.35083100 | 9.36143700  | 0.00064200  |
| C | 1.84115100  | 2.17017700  | -0.00250100 | C | 3.35092600  | -9.36136800 | -0.00126600 |
| C | 0.51920400  | -5.10232900 | -0.00154600 | C | 1.47754600  | -7.78341000 | -0.00074500 |
| C | 5.11908600  | 0.31970500  | 0.00174200  | C | -0.40469900 | -6.18849900 | 0.00055200  |
| C | -1.39834400 | 0.25431500  | 0.00385800  | C | -2.28273800 | -4.59278500 | 0.00163300  |
| C | -2.80010700 | 0.50924100  | -0.00286800 | C | -4.15953500 | -3.00080900 | 0.00165000  |
| C | -0.47887800 | 1.33805100  | -0.00328100 | C | -6.04022000 | -1.40824800 | 0.00064000  |
| C | -3.27888900 | 1.84755800  | 0.00243200  | C | -7.92083400 | 0.18844300  | -0.00057000 |
| C | -0.95899700 | 2.67942700  | 0.00327300  | C | -9.78332600 | 1.77905200  | -0.00117700 |
| C | -2.35753100 | 2.93353100  | -0.00221400 | C | 9.33462100  | -0.44770100 | 0.00084700  |
| C | -3.23960200 | -1.91561800 | -0.00219600 | C | 7.44335900  | 1.15191100  | 0.00073000  |
| C | -3.71951800 | -0.57478500 | 0.00242900  | C | 5.56216000  | 2.74386400  | 0.00092300  |
| C | 1.36195000  | 3.50833900  | 0.00264600  | C | 3.68014000  | 4.33789900  | 0.00102400  |
| C | -0.03924800 | 3.76315800  | -0.00205500 | C | 1.80046100  | 5.93470100  | 0.00076700  |
| C | -4.67867400 | 2.10153300  | -0.00158500 | C | -0.07715200 | 7.53098100  | 0.00037200  |
| C | -5.15750900 | 3.44465000  | 0.00050800  | C | -1.96402900 | 9.13593800  | 0.00037200  |
| C | -5.59705100 | 1.01787600  | 0.00069400  | C | 1.96400800  | -9.13588200 | -0.00091500 |
| C | -6.56109700 | 3.69865800  | -0.00064400 | C | 0.07715600  | -7.53097600 | -0.00052700 |
| C | -7.00398800 | 1.27369300  | -0.00083200 | C | -1.80044700 | -5.93469000 | -0.00055000 |
| C | -7.47997200 | 2.61221600  | -0.00067900 | C | -3.68014700 | -4.33788900 | -0.00060400 |
| C | -2.83643300 | 4.27309000  | 0.00158800  | C | -5.56216600 | -2.74387700 | -0.00050100 |
| C | -1.91690000 | 5.35574100  | -0.00073000 | C | -7.44336200 | -1.15191500 | -0.00042900 |
| C | -4.23974000 | 4.52642100  | -0.00072100 | C | -9.33467400 | 0.44771100  | -0.00075800 |
| C | -2.39887200 | 6.70202700  | 0.00060800  | H | 10.85359300 | -1.97354500 | 0.00090200  |

|   |              |              |             |          |              |              |             |
|---|--------------|--------------|-------------|----------|--------------|--------------|-------------|
| H | 3.71724800   | -10.38564800 | -0.00124300 | C        | -10.22278800 | -4.37936300  | 0.00048000  |
| C | 1.01465600   | -10.19803400 | -0.00090200 | C        | 10.22277500  | 4.37934300   | -0.00002700 |
| C | -0.84737000  | -8.61278600  | -0.00020600 | C        | 8.32526400   | 5.97767800   | -0.00060000 |
| C | -2.72409400  | -7.02162900  | 0.00055200  | C        | 6.43250000   | 7.58249100   | -0.00095100 |
| C | -4.60524200  | -5.42834500  | 0.00088600  | C        | 4.54041800   | 9.18811900   | -0.00089100 |
| C | -6.48402500  | -3.83231900  | 0.00058600  | C        | 2.65398100   | 10.79945100  | -0.00050600 |
| C | -8.36005500  | -2.24042600  | -0.00012100 | H        | 11.74906300  | 2.90134400   | 0.00042100  |
| C | -10.22791100 | -0.66209100  | -0.00077700 | H        | 10.92209000  | 5.21190200   | -0.00016400 |
| C | 10.22787600  | 0.66203100   | 0.00097200  | H        | 9.02841700   | 6.80786000   | -0.00064100 |
| C | 8.36005800   | 2.24039400   | 0.00054000  | H        | 7.13621600   | 8.41205000   | -0.00092700 |
| C | 6.48403400   | 3.83231600   | -0.00005200 | H        | 5.24482700   | 10.01723700  | -0.00090100 |
| C | 4.60524000   | 5.42835000   | -0.00044200 | H        | 3.36142700   | 11.62515800  | -0.00060700 |
| C | 2.72410100   | 7.02162200   | -0.00037200 | H        | -10.92209500 | -5.21192800  | 0.00063700  |
| C | 0.84740400   | 8.61279100   | 0.00004300  | H        | -9.02842500  | -6.80786600  | 0.00112200  |
| C | -1.01460500  | 10.19808300  | 0.00042500  | H        | -7.13621200  | -8.41205100  | 0.00130200  |
| C | 9.77836000   | 1.97119700   | 0.00055900  | H        | -5.24482200  | -10.01722700 | 0.00109700  |
| C | 7.88319300   | 3.57262500   | 0.00010000  | H        | -3.36140100  | -11.62514700 | 0.00058700  |
| C | 6.00246400   | 5.17124500   | -0.00024700 | H        | -0.94680600  | -12.06409500 | -0.00019500 |
| C | 4.12366400   | 6.76490900   | -0.00038000 | H        | 0.94683600   | 12.06412100  | -0.00011300 |
| C | 2.23959800   | 8.35967100   | -0.00027900 | H        | -1.38190100  | 11.22214000  | 0.00032400  |
| C | 0.35039500   | 9.96814300   | 0.00001600  | H        | -3.71724400  | 10.38569300  | 0.00049300  |
| C | -0.35038500  | -9.96811400  | -0.00034300 | H        | -6.05310800  | 9.55049300   | 0.00032500  |
| C | -2.23960800  | -8.35966200  | 0.00028200  | H        | -8.38747500  | 8.72349500   | -0.00010700 |
| C | -4.12366200  | -6.76491100  | 0.00067500  | H        | -9.97518300  | 6.85167100   | -0.00065400 |
| C | -6.00245900  | -5.17124300  | 0.00070300  | H        | -10.41042500 | 4.41398300   | -0.00102900 |
| C | -7.88320200  | -3.57261400  | 0.00035800  | H        | -10.85363000 | 1.97352400   | -0.00108400 |
| C | -9.77838400  | -1.97121100  | -0.00021900 | H        | -11.29816700 | -0.46670100  | -0.00073400 |
| H | 11.29812900  | 0.46663900   | 0.00084400  | H        | -11.74908100 | -2.90137600  | -0.00008900 |
| H | 1.38195300   | -11.22208700 | -0.00087800 |          |              |              |             |
| C | -1.31825000  | -11.04221700 | -0.00014100 | <b>6</b> |              |              |             |
| C | -3.18183100  | -9.45338500  | 0.00048500  | C        | -1.64672700  | 0.18923600   | -1.40522200 |
| C | -5.05510100  | -7.85969000  | 0.00092900  | C        | -1.62758200  | -1.11552000  | -0.85947300 |
| C | -6.93067100  | -6.26878300  | 0.00095100  | C        | -1.62823900  | 1.30250000   | -0.53274300 |
| C | -8.80862800  | -4.68061300  | 0.00055000  | C        | -1.64440500  | -1.31481400  | 0.54070200  |
| C | -10.68029400 | -3.10122300  | -0.00002700 | H        | -1.58759200  | -1.97333200  | -1.52265100 |
| C | 10.68027600  | 3.10119100   | 0.00040100  | C        | -1.64418000  | 1.12253800   | 0.87020100  |
| C | 8.80862400   | 4.68059200   | -0.00007500 | H        | -1.58827200  | 2.30563100   | -0.94423800 |
| C | 6.93068000   | 6.26876200   | -0.00050600 | C        | -1.62533500  | -0.18968400  | 1.39772300  |
| C | 5.05512500   | 7.85968700   | -0.00065800 | H        | -1.61814800  | -2.31723200  | 0.95179100  |
| C | 3.18185400   | 9.45339400   | -0.00047400 | H        | -1.61784100  | 1.97976100   | 1.53280800  |
| C | 1.31828000   | 11.04224200  | -0.00012600 | H        | -1.58351100  | -0.33525400  | 2.47209800  |
| C | -2.65396200  | -10.79943400 | 0.00039300  | H        | -1.62244900  | 0.33444000   | -2.47896200 |
| C | -4.54042000  | -9.18810300  | 0.00104000  | Cr       | 0.11837000   | -0.00020600  | 0.00010100  |
| C | -6.43251200  | -7.58248000  | 0.00132100  | C        | 1.19191900   | -1.19091200  | -0.92254900 |
| C | -8.32527800  | -5.97767700  | 0.00108300  | C        | 1.18920500   | 1.39501300   | -0.57168300 |

|          |             |             |             |          |             |             |             |
|----------|-------------|-------------|-------------|----------|-------------|-------------|-------------|
| C        | 1.19505400  | -0.20201300 | 1.49019200  | H        | 3.88188300  | -2.81095500 | -0.88908700 |
| O        | 1.84821000  | -0.33076100 | 2.44138800  | H        | 1.97499100  | -4.36860500 | -0.88300800 |
| O        | 1.83723700  | 2.28649800  | -0.93688000 | H        | -0.49588500 | -4.76854900 | -0.88044900 |
| O        | 1.84188600  | -1.95162800 | -1.51152700 | H        | -2.79354900 | -3.89371100 | -0.88605300 |
| <b>7</b> |             |             |             | <b>8</b> |             |             |             |
| C        | 0.23154300  | -1.41799800 | -0.83128600 | C        | -0.86880200 | 1.13696000  | -0.40430900 |
| C        | -1.11110400 | -0.90553500 | -0.82164200 | C        | 0.54699700  | 1.31650900  | -0.38372500 |
| C        | 1.34033400  | -0.51086500 | -0.82098300 | C        | -1.41434800 | -0.18400600 | -0.38275200 |
| C        | -1.34231900 | 0.50815200  | -0.83267100 | C        | 1.41810400  | 0.18359900  | -0.40621800 |
| C        | 1.11287000  | 0.90794600  | -0.83114000 | C        | -0.55097200 | -1.32023100 | -0.40555900 |
| C        | -0.22719500 | 1.41466200  | -0.82228700 | C        | 0.86575900  | -1.13237800 | -0.38429700 |
| Cr       | -0.00080500 | 0.00051700  | 1.11102000  | Cr       | 0.00139600  | -0.00054800 | 1.48610500  |
| C        | -0.90565600 | -1.18209600 | 2.17029200  | C        | 2.84090000  | 0.36844900  | -0.42323000 |
| C        | 1.47595400  | -0.18882800 | 2.17118900  | C        | 3.37664500  | 1.67951900  | -0.45004100 |
| C        | -0.57514100 | 1.37582900  | 2.16836900  | C        | 1.10001800  | 2.64439400  | -0.42709600 |
| O        | -0.94492400 | 2.26227200  | 2.82790200  | C        | 2.50526800  | 2.81643500  | -0.44811500 |
| O        | 2.42698500  | -0.31182600 | 2.83295700  | C        | -1.10224800 | -2.64482900 | -0.42245200 |
| O        | -1.48959700 | -1.94373400 | 2.83089900  | C        | -2.50750100 | -2.81811000 | -0.44869400 |
| C        | -2.67831700 | 1.01531800  | -0.84980500 | C        | -2.84087700 | -0.36886000 | -0.42579700 |
| C        | -3.75277900 | 0.09019900  | -0.86971000 | C        | -3.37587500 | -1.67932400 | -0.44678000 |
| C        | -2.22065700 | -1.80996400 | -0.85249000 | C        | 3.69371300  | -0.76170700 | -0.45002000 |
| C        | -3.53072800 | -1.27072500 | -0.87196800 | C        | 3.14159600  | -2.08327000 | -0.44832800 |
| H        | -4.37402700 | -1.95626100 | -0.88914100 | C        | 1.73922100  | -2.27513200 | -0.42794500 |
| H        | -4.76947500 | 0.47370900  | -0.88536800 | C        | -0.23474200 | -3.76418300 | -0.44961500 |
| C        | 2.22001200  | 1.81132500  | -0.84682100 | C        | 1.18567300  | -3.57818300 | -0.44821900 |
| C        | 3.53475400  | 1.26836700  | -0.86736000 | C        | -3.69261100 | 0.76190500  | -0.44684900 |
| C        | 2.67838800  | -1.01956400 | -0.85211600 | C        | -3.14360300 | 2.08508700  | -0.44867300 |
| C        | 3.75303100  | -0.08953300 | -0.87104300 | C        | -1.74036500 | 2.27655100  | -0.42131700 |
| H        | 4.37838800  | 1.95326400  | -0.88097300 | C        | 0.23262200  | 3.76278800  | -0.44716600 |
| H        | 4.76954800  | -0.47392700 | -0.88661300 | C        | -1.18791100 | 3.58026500  | -0.44861600 |
| C        | -2.86544500 | 2.42527300  | -0.87130200 | C        | 2.05713000  | -4.71089100 | -0.47940700 |
| C        | -1.79849800 | 3.29325900  | -0.87438800 | C        | 1.46862500  | -6.02329600 | -0.50034600 |
| C        | -0.45569400 | 2.82763200  | -0.85414200 | C        | 0.11714400  | -6.19948800 | -0.49832500 |
| H        | -3.88046200 | 2.81319500  | -0.88549700 | C        | -3.05258100 | -4.13938000 | -0.47639100 |
| H        | -1.97384300 | 4.36577400  | -0.89042500 | C        | -4.48395200 | -4.28449300 | -0.49819300 |
| C        | 1.95601200  | 3.20431100  | -0.86749200 | C        | -2.18183300 | -5.23798900 | -0.48625100 |
| C        | 0.66636900  | 3.69252200  | -0.87209900 | C        | -4.79424600 | -1.85882000 | -0.47874900 |
| H        | 0.49436800  | 4.76560000  | -0.89004600 | C        | -5.31094300 | -3.20133300 | -0.50025500 |
| H        | 2.79654800  | 3.89297500  | -0.88242900 | C        | -0.78806900 | -5.08151600 | -0.47675000 |
| C        | 2.86648800  | -2.42363500 | -0.87134800 | H        | 2.13237300  | -6.88410700 | -0.51771100 |
| C        | 1.79883200  | -3.29636300 | -0.86763900 | H        | -0.30363800 | -7.20171100 | -0.51519000 |
| C        | 0.46040600  | -2.82839700 | -0.84702400 | H        | -2.59968500 | -6.24214600 | -0.50667800 |
| C        | -1.95240200 | -3.20556900 | -0.87080300 | H        | -4.89882400 | -5.28918700 | -0.51556800 |
| C        | -0.66720500 | -3.69548900 | -0.86720000 | H        | -6.38943800 | -3.33682500 | -0.51825600 |

|          |             |             |             |    |             |             |             |
|----------|-------------|-------------|-------------|----|-------------|-------------|-------------|
| C        | 4.79412500  | 1.85890000  | -0.47747500 | C  | -0.24530300 | 1.41035700  | -0.21788600 |
| C        | 5.30981700  | 3.20179400  | -0.49908900 | C  | 1.34396700  | -0.49214500 | -0.21868700 |
| C        | -2.05963500 | 4.71279400  | -0.47659800 | C  | 1.10013400  | 0.91380400  | -0.19980700 |
| C        | -1.46969400 | 6.02497800  | -0.49833200 | Cr | -0.00041100 | -0.00170400 | 1.70838900  |
| C        | 3.05062700  | 4.13755700  | -0.47942800 | C  | -1.48907900 | -0.10221900 | 2.76884800  |
| C        | 4.48147200  | 4.28404800  | -0.50090100 | C  | 0.82859600  | -1.24344100 | 2.76726100  |
| C        | 2.17910600  | 5.23574500  | -0.49056000 | C  | 0.65835100  | 1.33602500  | 2.77044900  |
| C        | 0.78628600  | 5.08095900  | -0.47875000 | O  | 1.08178700  | 2.19777100  | 3.42915800  |
| C        | -0.11811500 | 6.19958900  | -0.50005200 | O  | 1.36266100  | -2.04317500 | 3.42380900  |
| H        | 6.38815500  | 3.33850900  | -0.51613800 | O  | -2.44743500 | -0.16769700 | 3.42701100  |
| H        | 4.89520900  | 5.28921900  | -0.51848900 | C  | -0.48756500 | 2.81669700  | -0.22894100 |
| H        | 2.59751500  | 6.23980200  | -0.51084000 | C  | -1.82061700 | 3.29863000  | -0.25518300 |
| H        | 0.30377900  | 7.20134900  | -0.51782500 | C  | -2.68137400 | 0.98923800  | -0.23803100 |
| H        | -2.13248100 | 6.88651800  | -0.51561800 | C  | -2.91415400 | 2.38730500  | -0.25089200 |
| C        | 4.00634600  | -3.22170100 | -0.47938600 | C  | 2.68292200  | -0.98558100 | -0.22994200 |
| C        | 3.44402100  | -4.50536200 | -0.49078300 | C  | 2.91458500  | -2.38753800 | -0.25784100 |
| C        | 5.42736700  | -2.99790200 | -0.50010800 | C  | 0.48441400  | -2.81637100 | -0.23928400 |
| C        | 5.62660900  | 0.73026700  | -0.48701300 | C  | 1.82098600  | -3.29774500 | -0.25381400 |
| C        | 5.11050100  | -0.57316700 | -0.47722400 | C  | 0.61075400  | 3.71825100  | -0.25593400 |
| C        | 5.95193200  | -1.74005800 | -0.49829800 | C  | 1.94583800  | 3.22635800  | -0.25097300 |
| H        | 4.10435500  | -5.36976300 | -0.51038800 | C  | 2.19725800  | 1.82809000  | -0.23679900 |
| H        | 6.08387600  | -3.86423100 | -0.51699200 | C  | 3.76683800  | -0.07205900 | -0.25447200 |
| H        | 7.02941900  | -1.59674100 | -0.51479400 | C  | 3.52434500  | 1.33067200  | -0.24952300 |
| H        | 6.70513200  | 0.87072200  | -0.50701700 | C  | -0.60995900 | -3.71690300 | -0.25153400 |
| C        | -5.62477000 | -0.73015900 | -0.49091200 | C  | -1.94595700 | -3.22555700 | -0.25517300 |
| C        | -5.10939100 | 0.57370900  | -0.47929700 | C  | -2.19516200 | -1.83006900 | -0.22992600 |
| C        | -5.95172200 | 1.73943100  | -0.50159300 | C  | -3.76660800 | 0.07247300  | -0.25187300 |
| C        | -3.44647400 | 4.50811100  | -0.48683300 | C  | -3.52508600 | -1.32975700 | -0.25630400 |
| C        | -4.00777600 | 3.22279400  | -0.47707800 | C  | 4.62160500  | 2.24405800  | -0.27595900 |
| C        | -5.42859700 | 2.99796700  | -0.49963500 | C  | 5.95296500  | 1.74884200  | -0.29087200 |
| H        | -4.10718100 | 5.37205100  | -0.50760300 | C  | 6.19493500  | 0.34744300  | -0.29096600 |
| H        | -6.08603100 | 3.86355500  | -0.51736800 | C  | 4.25271100  | -2.88002300 | -0.27700600 |
| H        | -7.02902700 | 1.59489300  | -0.51993000 | C  | 4.49005400  | -4.28130700 | -0.29556900 |
| H        | -6.70346800 | -0.87006400 | -0.51173800 | C  | 5.34459900  | -1.96712600 | -0.28482200 |
| C        | 0.66805300  | 1.33203400  | 2.55528200  | C  | 2.06350300  | -4.70308200 | -0.28064500 |
| C        | 0.82534900  | -1.24221700 | 2.55483300  | C  | 3.39872900  | -5.18990900 | -0.29644000 |
| C        | -1.48428400 | -0.09145300 | 2.55776400  | C  | 5.10643100  | -0.56516800 | -0.27419800 |
| O        | 1.35310700  | -2.03694700 | 3.22108500  | C  | -2.06338000 | 4.70534400  | -0.27524000 |
| O        | 1.09527800  | 2.18494300  | 3.22149900  | C  | -3.39797900 | 5.19162700  | -0.29333300 |
| O        | -2.43564400 | -0.14935700 | 3.22532800  | C  | -4.62072600 | -2.24233600 | -0.27418000 |
| <b>9</b> |             |             |             | C  | -5.95291200 | -1.74724100 | -0.29119100 |
| C        | -1.09830600 | -0.91717500 | -0.21890000 | C  | -4.25380200 | 2.88079000  | -0.27804800 |
| C        | -1.34102200 | 0.49624700  | -0.20039100 | C  | -4.49063900 | 4.28143000  | -0.29355700 |
| C        | 0.24117500  | -1.40904500 | -0.20114500 | C  | -5.34401000 | 1.96799300  | -0.28533600 |
|          |             |             |             | C  | -5.10488500 | 0.56509000  | -0.27796900 |

|   |             |             |             |           |             |             |             |
|---|-------------|-------------|-------------|-----------|-------------|-------------|-------------|
| C | -6.19417200 | -0.34779500 | -0.29227000 | H         | 2.73706700  | -8.55503900 | -0.33490300 |
| C | 3.04165300  | 4.13896900  | -0.27725900 | H         | 0.28932700  | -8.97723200 | -0.33254000 |
| C | 4.37613100  | 3.64461900  | -0.28374000 | C         | -3.90667400 | -6.45090600 | -0.30788500 |
| C | 2.79563700  | 5.53876800  | -0.29302500 | C         | -7.05221400 | -2.67494300 | -0.30788000 |
| C | -0.96833100 | 5.61251700  | -0.28491500 | H         | -6.04164100 | -6.64678000 | -0.32404500 |
| C | 0.36819700  | 5.12341300  | -0.27547900 | H         | -7.63140600 | -4.73810600 | -0.32395400 |
| C | 1.46309400  | 6.02953100  | -0.29323500 | C         | -5.84232300 | 4.76954000  | -0.31290400 |
| C | 0.96810700  | -5.61155500 | -0.28720600 | C         | -7.54074800 | 0.15800800  | -0.31071400 |
| C | -0.36750500 | -5.12387400 | -0.27848700 | H         | -7.91941900 | 4.23857600  | -0.33195700 |
| C | -1.46210100 | -6.02922600 | -0.29253300 | H         | -8.77762000 | 1.90783600  | -0.33026900 |
| C | -4.37603000 | -3.64440100 | -0.28243500 | C         | -8.62247800 | -0.79732400 | -0.32374400 |
| C | -3.04285000 | -4.13909400 | -0.27371100 | C         | -8.39144700 | -2.13707200 | -0.32202600 |
| C | -2.79669200 | -5.53808900 | -0.29097500 | H         | -9.64097800 | -0.41715200 | -0.33456400 |
| C | -1.21200300 | 7.02543200  | -0.30546300 | H         | -9.22378300 | -2.83644700 | -0.33202800 |
| C | -0.10234300 | 7.90671500  | -0.31638400 | C         | -3.62018600 | -7.86501700 | -0.32249300 |
| C | -2.55092300 | 7.48417400  | -0.31646300 | C         | -2.34401300 | -8.33479800 | -0.32464600 |
| C | 5.47789500  | 4.56221100  | -0.30475400 | H         | -4.45842400 | -8.55731100 | -0.33265600 |
| C | 5.20457000  | 5.95254500  | -0.31675800 | H         | -2.15470800 | -9.40534900 | -0.33599700 |
| C | 6.79455200  | 4.04329800  | -0.31543400 | C         | 5.00226500  | -7.06804500 | -0.33077100 |
| C | 6.69002300  | -2.46250000 | -0.30487600 | C         | 6.04699100  | -6.19809200 | -0.32952200 |
| C | 7.75679600  | -1.53239700 | -0.31436700 | H         | 5.18241400  | -8.14014400 | -0.34254900 |
| C | 6.89846300  | -3.86411500 | -0.31683800 | H         | 7.06882500  | -6.56927000 | -0.34083700 |
| C | 1.21192800  | -7.02453600 | -0.30860000 | C         | 8.62183500  | 0.79776000  | -0.32330800 |
| C | 0.10414700  | -7.90531500 | -0.31873200 | C         | 8.39055800  | 2.13786900  | -0.32376300 |
| C | 2.55263000  | -7.48299300 | -0.32107400 | C         | 3.62049700  | 7.86648400  | -0.32699800 |
| C | -5.47783300 | -4.56183900 | -0.30094600 | C         | 2.34475600  | 8.33629000  | -0.32674200 |
| C | -5.20565600 | -5.95077900 | -0.31099400 | C         | -5.00150400 | 7.06816500  | -0.32734100 |
| C | -6.79587800 | -4.04154500 | -0.31102100 | C         | -6.04642000 | 6.19782200  | -0.32795900 |
| C | -6.68956300 | 2.46326500  | -0.30641300 | H         | 9.22292900  | 2.83719500  | -0.33477500 |
| C | -7.75698700 | 1.53147800  | -0.31698300 | H         | 9.64046100  | 0.41792600  | -0.33446000 |
| C | -6.89850600 | 3.86299200  | -0.31821600 | H         | 4.45895400  | 8.55848700  | -0.33832000 |
| C | -3.63357900 | 6.60931300  | -0.31219400 | H         | 2.15537300  | 9.40682000  | -0.33837800 |
| C | 1.20929200  | 7.44541300  | -0.31198400 | H         | -7.06823200 | 6.56906300  | -0.33958300 |
| H | -2.73558200 | 8.55615600  | -0.33100900 | H         | -5.18200600 | 8.14020900  | -0.33903100 |
| H | -0.28767700 | 8.97858700  | -0.33088100 |           |             |             |             |
| C | 3.90700500  | 6.45199100  | -0.31189600 | <b>10</b> |             |             |             |
| C | 7.05161300  | 2.67530300  | -0.30955500 | C         | 7.83058400  | -7.89860500 | -0.25114300 |
| H | 6.04070700  | 6.64837500  | -0.33036300 | C         | 7.59144100  | -6.47269000 | -0.23585800 |
| H | 7.63017600  | 4.73974400  | -0.32904700 | C         | 6.22096600  | -6.01916000 | -0.21686800 |
| C | 7.54044400  | -0.15736200 | -0.30930800 | C         | 5.15660700  | -6.95245600 | -0.21632500 |
| C | 5.84313100  | -4.76934700 | -0.31387800 | C         | 5.42735400  | -8.37031900 | -0.23413700 |
| H | 8.77748700  | -1.90852900 | -0.32847000 | C         | 6.80986300  | -8.79365700 | -0.25051200 |
| H | 7.91941900  | -4.23954500 | -0.33086600 | C         | 5.94861900  | -4.62305200 | -0.20017300 |
| C | 3.63399100  | -6.60901500 | -0.31585500 | C         | 3.80786400  | -6.50017600 | -0.19913500 |
| C | -1.20905800 | -7.44394200 | -0.31163100 | C         | 3.53159800  | -5.10167000 | -0.17823300 |

|   |             |              |             |    |             |             |             |
|---|-------------|--------------|-------------|----|-------------|-------------|-------------|
| C | 4.59796400  | -4.16672400  | -0.18032600 | C  | -1.11128600 | 5.58169700  | -0.16612700 |
| C | 2.17939100  | -4.64595900  | -0.16174600 | C  | -3.80842000 | 6.50086100  | -0.19419600 |
| C | 1.10990100  | -5.58190500  | -0.16621400 | C  | -1.39012100 | 6.98444900  | -0.18507400 |
| C | 1.38928700  | -6.98466500  | -0.18951700 | C  | -2.73612900 | 7.43747900  | -0.19768900 |
| C | 2.73565400  | -7.43723900  | -0.20274000 | C  | -4.32394000 | 2.76754800  | -0.16175300 |
| C | 3.01413700  | -8.84646400  | -0.22219300 | C  | -5.38933500 | 1.82974500  | -0.16890600 |
| C | 4.37472500  | -9.26923500  | -0.23649700 | C  | -4.59885800 | 4.16723800  | -0.17636500 |
| H | 4.58614900  | -10.33631900 | -0.24992300 | C  | -6.74397100 | 2.28920600  | -0.19345600 |
| H | 8.86178700  | -8.24290600  | -0.26376600 | C  | -5.94898900 | 4.62351300  | -0.19840800 |
| H | 7.01691300  | -9.86095400  | -0.26240200 | C  | -7.01749000 | 3.68264900  | -0.20499200 |
| C | 8.62020900  | -5.54653400  | -0.23932600 | C  | -5.11337500 | 0.43569500  | -0.16244800 |
| C | 8.37871500  | -4.14238400  | -0.22627900 | C  | 0.23504300  | 5.12617700  | -0.15437000 |
| C | 7.01774900  | -3.68244100  | -0.20557400 | C  | -5.15781100 | 6.95308400  | -0.21153800 |
| H | 9.65056500  | -5.89528800  | -0.25388100 | C  | -6.22137700 | 6.02025000  | -0.21367400 |
| C | 6.74458700  | -2.28862200  | -0.19237000 | C  | -7.59239500 | 6.47345500  | -0.23262500 |
| C | 5.39023700  | -1.82870200  | -0.17121700 | C  | -8.62062900 | 5.54728000  | -0.23800200 |
| C | 4.32252700  | -2.76681700  | -0.15948400 | C  | -7.83153200 | 7.89949900  | -0.24672600 |
| C | 1.90192200  | -3.25301500  | -0.13228300 | C  | -5.42820100 | 8.37139900  | -0.22841800 |
| C | 2.97761600  | -2.31020000  | -0.13924300 | C  | -4.37572400 | 9.26995000  | -0.22946300 |
| C | 2.71025700  | -0.91828600  | -0.11009000 | C  | -6.81088600 | 8.79458600  | -0.24458300 |
| C | 1.35480700  | -0.45718600  | -0.09691700 | C  | -8.37905400 | 4.14255900  | -0.22581900 |
| C | 3.76923100  | 0.02096600   | -0.13750700 | C  | -3.01443300 | 8.84727000  | -0.21617100 |
| C | 1.07554700  | 0.93950000   | -0.07904500 | Cr | -0.00047200 | 0.00089100  | 1.80045600  |
| C | 3.48986000  | 1.42270000   | -0.13016500 | C  | 0.62533200  | 1.35772300  | 2.86366400  |
| C | 2.15218700  | 1.88500800   | -0.11733900 | C  | -1.48903900 | -0.13363900 | 2.86279200  |
| C | 0.55683800  | -2.80618900  | -0.11736700 | C  | 0.86084900  | -1.21926800 | 2.86415300  |
| C | 0.27631500  | -1.40111100  | -0.07837100 | O  | 1.02701700  | 2.23104900  | 3.51937000  |
| C | -0.51244400 | -3.73345100  | -0.12937200 | O  | 1.41518400  | -2.00423800 | 3.52030400  |
| C | -1.07307500 | -0.94453500  | -0.09705200 | O  | -2.44700700 | -0.22067000 | 3.51758900  |
| C | -1.86612300 | -3.27446000  | -0.13526500 | C  | 1.94003400  | -9.75316800 | -0.22831600 |
| C | -2.15008200 | -1.88782700  | -0.10872600 | C  | 0.31913900  | -7.91825100 | -0.19877900 |
| C | 5.11579100  | -0.43615800  | -0.15774900 | C  | -1.30988500 | -6.06613800 | -0.17176400 |
| C | -0.23501700 | -5.12820800  | -0.15856000 | C  | -2.93537500 | -4.21196600 | -0.15355200 |
| C | -0.28137900 | 1.40146800   | -0.09764300 | C  | -4.55734400 | -2.35971600 | -0.15621300 |
| C | -0.55993100 | 2.80570500   | -0.10857300 | C  | -6.18417200 | -0.50740100 | -0.17733900 |
| C | -1.35146900 | 0.46129300   | -0.07953600 | C  | -7.80911900 | 1.34958100  | -0.20532700 |
| C | -1.90281400 | 3.25312800   | -0.13651900 | C  | -9.41721200 | 3.19647900  | -0.23496600 |
| C | -2.70873900 | 0.92092200   | -0.11855200 | C  | 9.41799900  | -3.19589900 | -0.23381200 |
| C | -2.97725000 | 2.31039900   | -0.13132300 | C  | 7.80995700  | -1.34953000 | -0.20398700 |
| C | 1.86648100  | 3.27316300   | -0.13040000 | C  | 6.18592200  | 0.50704400  | -0.17745700 |
| C | 0.51199500  | 3.73322800   | -0.13645100 | C  | 4.55915400  | 2.36035200  | -0.15907200 |
| C | -3.48937000 | -1.42338600  | -0.13799000 | C  | 2.93422900  | 4.20995300  | -0.15827100 |
| C | -3.76818700 | -0.02050700  | -0.13234500 | C  | 1.30986600  | 6.06467400  | -0.17295200 |
| C | -2.18019100 | 4.64774800   | -0.15530500 | C  | -0.31946900 | 7.91793100  | -0.19528600 |
| C | -3.53214200 | 5.10285900   | -0.17626800 | C  | -1.94094900 | 9.75312800  | -0.22180800 |

|   |              |              |             |           |              |              |             |
|---|--------------|--------------|-------------|-----------|--------------|--------------|-------------|
| C | 0.60162100   | -9.32722900  | -0.21791700 | C         | 9.40305800   | 3.33783300   | -0.22813900 |
| C | -1.02998400  | -7.46342500  | -0.19192700 | C         | 7.77761200   | 5.18440800   | -0.21685300 |
| C | -2.65357000  | -5.61024400  | -0.17245200 | C         | 6.15495400   | 7.03318200   | -0.21423700 |
| C | -4.27868700  | -3.75333900  | -0.16609600 | C         | 4.53588800   | 8.88486300   | -0.22008400 |
| C | -5.90754800  | -1.89825800  | -0.17704400 | C         | 2.92558400   | 10.73010000  | -0.23220400 |
| C | -7.53356800  | -0.04737800  | -0.19899200 | C         | -2.92589400  | -10.73176100 | -0.23402700 |
| C | -9.16892800  | 1.81300300   | -0.22601000 | C         | -4.53640000  | -8.88653100  | -0.21953700 |
| C | 9.17015600   | -1.81338200  | -0.22469400 | C         | -6.15549100  | -7.03423200  | -0.21241400 |
| C | 7.53486800   | 0.04728200   | -0.19710200 | C         | -7.77687300  | -5.18439600  | -0.21555100 |
| C | 5.90889300   | 1.89854500   | -0.17455200 | C         | -9.40150700  | -3.33760100  | -0.22819900 |
| C | 4.27959400   | 3.75182800   | -0.16424300 | C         | -11.02093000 | -1.50048300  | -0.24680700 |
| C | 2.65279900   | 5.60875300   | -0.17179200 | C         | 10.75769100  | 2.83206800   | -0.24411900 |
| C | 1.02975400   | 7.46244900   | -0.18989600 | C         | 9.11498000   | 4.69133000   | -0.23023000 |
| C | -0.60162000  | 9.32642100   | -0.21329600 | C         | 7.47727000   | 6.55644900   | -0.22329800 |
| H | 2.15269100   | -10.81990500 | -0.24217500 | C         | 5.84072500   | 8.42284200   | -0.22443200 |
| H | 10.44787500  | -3.54570400  | -0.24924400 | C         | 4.21112200   | 10.29377900  | -0.23252500 |
| C | 10.21690600  | -0.84582500  | -0.23621400 | C         | -4.21142100  | -10.29551600 | -0.23266000 |
| C | 8.60120000   | 0.98972800   | -0.21268500 | C         | -5.84084200  | -8.42444800  | -0.22243100 |
| C | 6.97914800   | 2.83958300   | -0.19470100 | C         | -7.47675700  | -6.55760800  | -0.22087500 |
| C | 5.35488400   | 4.69516500   | -0.18649900 | C         | -9.11371300  | -4.69154200  | -0.22892700 |
| C | 3.72596700   | 6.54727700   | -0.19076200 | C         | -10.75604100 | -2.83191200  | -0.24444300 |
| C | 2.10277800   | 8.39641700   | -0.20402300 | H         | -2.70868800  | -11.79705500 | -0.24453300 |
| C | 0.49373400   | 10.23764600  | -0.22320100 | H         | -5.03227400  | -11.00841700 | -0.24230400 |
| C | -0.49418600  | -10.23879700 | -0.22763500 | H         | -6.65952600  | -9.14077800  | -0.23468800 |
| C | -2.10352700  | -8.39773300  | -0.20541500 | H         | -8.29491400  | -7.27435700  | -0.23442200 |
| C | -3.72628400  | -6.54851400  | -0.18933300 | H         | -9.93115200  | -5.40928000  | -0.24186700 |
| C | -5.35424700  | -4.69618100  | -0.18474100 | H         | -11.57002000 | -3.55262300  | -0.25546000 |
| C | -6.97812900  | -2.83970600  | -0.19457500 | H         | 5.03203700   | 11.00660000  | -0.24245400 |
| C | -8.59963400  | -0.98922700  | -0.21406900 | H         | 6.65928900   | 9.13930500   | -0.23652600 |
| C | -10.21540100 | 0.84609800   | -0.23826000 | H         | 8.29493700   | 7.27377400   | -0.23655200 |
| C | -1.81042400  | -9.81156000  | -0.22203300 | H         | 9.93218500   | 5.40933900   | -0.24309900 |
| C | -3.44320500  | -7.94313600  | -0.20409900 | H         | 11.57165100  | 3.55280000   | -0.25529700 |
| C | -5.07360200  | -6.08828400  | -0.19465600 | H         | 12.05042700  | 1.14629300   | -0.25806100 |
| C | -6.69801800  | -4.23580400  | -0.19751000 | H         | -12.04867300 | -1.14599300  | -0.25944700 |
| C | -8.32349000  | -2.37752600  | -0.21169600 | H         | -11.24522200 | 1.19644200   | -0.25250600 |
| C | -9.96305900  | -0.51487100  | -0.23286000 | H         | -10.44734400 | 3.54558000   | -0.24991900 |
| C | 9.96482200   | 0.51483800   | -0.23152300 | H         | -9.65110500  | 5.89569900   | -0.25227900 |
| C | 8.32506300   | 2.37711800   | -0.21133900 | H         | -8.86274400  | 8.24377700   | -0.25930500 |
| C | 6.69850100   | 4.23527300   | -0.19835400 | H         | -7.01805100  | 9.86187300   | -0.25567600 |
| C | 5.07364200   | 6.08735100   | -0.19625200 | H         | -4.58698700  | 10.33707600  | -0.24253200 |
| C | 3.44325700   | 7.94137400   | -0.20446100 | H         | -2.15287800  | 10.82000500  | -0.23545300 |
| C | 1.81022700   | 9.80994700   | -0.21971500 | H         | 0.28064800   | 11.30441100  | -0.23554200 |
| H | -0.28075300  | -11.30549200 | -0.24039200 | H         | 2.70840400   | 11.79540400  | -0.24208200 |
| H | 11.24666900  | -1.19633900  | -0.25079000 |           |              |              |             |
| C | 11.02264400  | 1.50068200   | -0.24554100 | <b>11</b> |              |              |             |

|           |             |             |             |           |             |             |             |
|-----------|-------------|-------------|-------------|-----------|-------------|-------------|-------------|
| C         | 1.64309300  | -0.70719300 | 1.22990100  | C         | -3.01290400 | -2.24429100 | -0.84406800 |
| C         | 1.64309200  | 0.71165200  | 1.22732600  | C         | -2.74328000 | -0.85341900 | -0.81879700 |
| Cr        | 0.00014000  | 0.00000000  | -0.00002600 | H         | -2.24094100 | -4.24121700 | -0.87316900 |
| C         | 1.64385000  | 1.41876800  | -0.00257200 | H         | -4.04939400 | -2.57227900 | -0.87156700 |
| C         | 1.64324600  | 0.70714200  | -1.22989600 | C         | -3.45108900 | 1.48709600  | -0.84176500 |
| C         | 1.64384800  | -1.41876900 | 0.00257800  | C         | -3.75502100 | 0.13838700  | -0.84231800 |
| C         | 1.64324400  | -0.71160200 | -1.22732100 | H         | -4.79453200 | -0.17986700 | -0.86968500 |
| H         | 1.59641400  | -1.25601800 | -2.16588900 | C         | 1.99619400  | 3.18360200  | -0.84304900 |
| H         | 1.59641900  | 1.24814700  | -2.17043400 | C         | 3.01230800  | 2.24603500  | -0.84306900 |
| C         | -1.64322600 | -1.22954600 | -0.70786400 | C         | 2.74272700  | 0.85520700  | -0.81879400 |
| C         | -1.64317600 | -1.22777700 | 0.71094400  | C         | 3.45059400  | -1.48532900 | -0.84371100 |
| C         | -1.64407500 | 0.00176400  | 1.41861900  | C         | 3.75452800  | -0.13661200 | -0.84329600 |
| C         | -1.64317100 | 1.22954300  | 0.70789100  | H         | 4.04875200  | 2.57419200  | -0.87054500 |
| C         | -1.64322800 | 1.22778300  | -0.71091800 | H         | 4.79398100  | 0.18180400  | -0.87067200 |
| C         | -1.64410600 | -0.00176300 | -1.41858000 | H         | 4.25293000  | -2.21890300 | -0.87142600 |
| H         | -1.59686100 | -2.16974400 | -1.24946700 | C         | 1.38690800  | -0.31569400 | 2.54717700  |
| H         | -1.59663500 | -2.16659700 | 1.25491700  | C         | 0.96448000  | 1.04074800  | 2.54984600  |
| H         | -1.59612800 | 0.00311200  | 2.50363900  | C         | -0.42146800 | 1.35324600  | 2.55098200  |
| H         | -1.59662900 | 2.16971500  | 1.24952400  | C         | -1.38483400 | 0.30898600  | 2.55059700  |
| H         | -1.59685800 | 2.16663000  | -1.25485900 | C         | -0.96238300 | -1.04743900 | 2.54645500  |
| H         | -1.59656300 | -0.00311000 | -2.50362400 | C         | 0.42354400  | -1.35992100 | 2.54414300  |
| H         | 1.59689800  | -2.50380900 | 0.00440900  | H         | 2.44393100  | -0.55351000 | 2.47384700  |
| H         | 1.59690100  | 2.50380800  | -0.00467900 | H         | 1.69937000  | 1.83700400  | 2.47859700  |
| H         | 1.59666400  | 1.25598000  | 2.16594900  | H         | -0.74373000 | 2.38783000  | 2.48090900  |
| H         | 1.59666700  | -1.24810900 | 2.17049400  | H         | -2.44197500 | 0.54714400  | 2.48008000  |
| <b>12</b> |             |             |             | H         | -1.69735500 | -1.84336600 | 2.47248300  |
| C         | 1.37151600  | 0.42811600  | -0.79063600 | H         | 0.74567700  | -2.39414300 | 2.46851800  |
| C         | 1.05570100  | -0.97341500 | -0.79099600 | H         | -4.25342700 | 2.22070600  | -0.86868300 |
| C         | 0.31565700  | 1.40242200  | -0.79063600 | H         | -2.55381200 | 4.06234100  | -0.86812000 |
| C         | -0.31612700 | -1.40074700 | -0.79142800 | H         | -0.20471600 | 4.79398500  | -0.86915000 |
| C         | -1.05625100 | 0.97506400  | -0.79020300 | H         | 2.24033300  | 4.24298500  | -0.87042200 |
| C         | -1.37201500 | -0.42649600 | -0.79063100 | <b>13</b> |             |             |             |
| Cr        | -0.00007500 | 0.00021300  | 0.93877000  | C         | -0.13736900 | -1.42323100 | -0.39800500 |
| C         | -0.63183400 | -2.80168600 | -0.82067400 | C         | -1.30144000 | -0.59269500 | -0.39809300 |
| C         | 0.43792100  | -3.73052100 | -0.84527800 | C         | 1.16402000  | -0.83033900 | -0.39809700 |
| C         | 2.11116000  | -1.94732100 | -0.81964400 | C         | -1.16418600 | 0.83067700  | -0.39756900 |
| C         | 1.75806200  | -3.31929900 | -0.84471600 | C         | 1.30127800  | 0.59302800  | -0.39807300 |
| H         | 2.55334000  | -4.06050500 | -0.87238100 | C         | 0.13720600  | 1.42357100  | -0.39745000 |
| H         | 0.20406000  | -4.79220300 | -0.87340500 | Cr        | 0.00010100  | -0.00024600 | 1.30412800  |
| C         | -2.11163900 | 1.94899700  | -0.81759600 | C         | -2.33607600 | 1.66663300  | -0.41603300 |
| C         | -1.75855600 | 3.32104700  | -0.84150200 | C         | -3.61990100 | 1.07091000  | -0.43667700 |
| C         | 0.63128000  | 2.80334200  | -0.81860800 | C         | -2.61141900 | -1.18962200 | -0.41675300 |
| C         | -0.43850700 | 3.73224100  | -0.84206000 | C         | -3.75775100 | -0.35979300 | -0.43713800 |
| C         | -1.99678700 | -3.18186400 | -0.84500600 | C         | 2.61125200  | 1.18996700  | -0.41670200 |



|   |             |             |             |           |             |             |             |
|---|-------------|-------------|-------------|-----------|-------------|-------------|-------------|
| C | 3.75758400  | 0.36014000  | -0.43755900 | C         | 4.62317800  | -3.29782000 | -0.47045100 |
| C | 2.33591400  | -1.66629700 | -0.41702600 | C         | 3.35661500  | -3.90041000 | -0.46191900 |
| C | 3.61973100  | -1.07056000 | -0.43760800 | C         | 3.17709100  | -5.32875000 | -0.47948000 |
| C | -2.19067900 | 3.07433200  | -0.43605600 | C         | -0.54468600 | -5.65258600 | -0.47027300 |
| C | -0.88264400 | 3.67031800  | -0.43593500 | C         | 0.74113000  | -5.09221300 | -0.46181100 |
| C | 0.27513100  | 2.85643400  | -0.41592000 | C         | 1.93686400  | -5.89388500 | -0.47943500 |
| C | 2.73713000  | 2.59958200  | -0.43691200 | H         | -0.64902800 | -6.73545600 | -0.48828700 |
| C | 1.56702500  | 3.43430900  | -0.43634900 | H         | 1.82979900  | -6.97588600 | -0.49571100 |
| C | 2.19051300  | -3.07398200 | -0.43752000 | H         | 4.06390200  | -5.95781900 | -0.49580800 |
| C | 0.88247400  | -3.66996900 | -0.43742500 | H         | 5.50881600  | -3.92960400 | -0.48851000 |
| C | -0.27529400 | -2.85609800 | -0.41696200 | C         | 1.41245700  | -0.14594900 | 2.93550000  |
| C | -2.73729700 | -2.59923400 | -0.43746500 | C         | 0.83173500  | 1.14903100  | 2.93657300  |
| C | -1.56719200 | -3.43395800 | -0.43738700 | C         | -0.58009600 | 1.29374900  | 2.93694400  |
| C | 1.69963400  | 4.85741900  | -0.46028400 | C         | -1.41118300 | 0.14334000  | 2.93668900  |
| C | 3.02646500  | 5.41611000  | -0.47787000 | C         | -0.83046000 | -1.15163900 | 2.93555600  |
| C | 4.13598800  | 4.62463200  | -0.47825600 | C         | 0.58136800  | -1.29635200 | 2.93473000  |
| C | 5.05642900  | 0.95677800  | -0.46171200 | H         | 2.49054800  | -0.25594500 | 2.87026600  |
| C | 6.20362700  | 0.08711000  | -0.47948600 | H         | 1.46659600  | 2.02736200  | 2.87218100  |
| C | 5.16777600  | 2.35493400  | -0.46985500 | H         | -1.02335400 | 2.28267100  | 2.87248600  |
| C | 4.78072500  | -1.90413600 | -0.46200500 | H         | -2.48932700 | 0.25341300  | 2.87244700  |
| C | 6.07292800  | -1.26950400 | -0.47961500 | H         | -1.46535900 | -2.02988000 | 2.87033700  |
| C | 4.03960500  | 3.18824700  | -0.46111000 | H         | 1.02456500  | -2.28517500 | 2.86837700  |
| H | 5.12655700  | 5.07291800  | -0.49458900 | H         | -6.95654000 | 1.90369100  | -0.49437900 |
| H | 6.15772000  | 2.80603600  | -0.48792700 | H         | -5.50898900 | 3.92997300  | -0.48632100 |
| H | 7.19183500  | 0.54052000  | -0.49587000 | H         | -4.06407700 | 5.95818700  | -0.49310300 |
| H | 6.95636400  | -1.90332400 | -0.49603100 | H         | -1.82997800 | 6.97625300  | -0.49295700 |
| C | -4.78089400 | 1.90449400  | -0.46062600 | H         | 0.64884800  | 6.73582300  | -0.48595800 |
| C | -6.07310100 | 1.26986700  | -0.47830000 | H         | 3.12793900  | 6.49864200  | -0.49380600 |
| C | -1.69980800 | -4.85706300 | -0.46180200 |           |             |             |             |
| C | -3.02663900 | -5.41574600 | -0.47938100 | <b>14</b> |             |             |             |
| C | -5.05660400 | -0.95642100 | -0.46132900 | C         | 3.57940100  | 7.88660700  | -0.32505300 |
| C | -6.20380000 | -0.08675000 | -0.47863700 | C         | 4.77005100  | 7.22898600  | -0.32463100 |
| C | -5.16794700 | -2.35457700 | -0.46996400 | C         | 2.32228600  | 7.17844900  | -0.30771700 |
| C | -4.03977400 | -3.18788600 | -0.46168400 | C         | 4.84007400  | 5.78789900  | -0.30708800 |
| C | -4.13616000 | -4.62427000 | -0.47932600 | C         | 3.60376000  | 5.05407800  | -0.28553700 |
| H | -7.19201300 | -0.54014800 | -0.49505700 | C         | 2.35941700  | 5.74134200  | -0.28566300 |
| H | -6.15789300 | -2.80567000 | -0.48805800 | C         | 3.63630800  | 3.63240600  | -0.26621800 |
| H | -5.12673400 | -5.07254500 | -0.49566800 | C         | 4.88049800  | 2.94234400  | -0.27653800 |
| H | -3.12811500 | -6.49827400 | -0.49568000 | C         | 6.10939600  | 3.68300500  | -0.29960900 |
| C | -0.74130400 | 5.09256800  | -0.45985100 | C         | 6.04906300  | 5.09765700  | -0.31213200 |
| C | 0.54451400  | 5.65294600  | -0.46830600 | C         | 1.09424400  | 7.83407300  | -0.31358800 |
| C | -1.93703400 | 5.89424700  | -0.47703600 | C         | -0.13534000 | 7.13185100  | -0.30075200 |
| C | -4.62335200 | 3.29817800  | -0.46859500 | C         | -0.10800100 | 5.69735100  | -0.27668200 |
| C | -3.35678400 | 3.90076700  | -0.46001400 | C         | 1.13868000  | 5.01179600  | -0.26730400 |
| C | -3.17726700 | 5.32910800  | -0.47710700 | C         | 2.41500900  | 2.89482400  | -0.24165400 |

|    |             |             |             |   |             |             |             |
|----|-------------|-------------|-------------|---|-------------|-------------|-------------|
| C  | 1.16469300  | 3.58540200  | -0.23942800 | C | 3.77131600  | -3.49177500 | -0.26762400 |
| C  | -0.05425900 | 2.86297600  | -0.21953700 | C | 2.57541900  | -5.64754000 | -0.28562900 |
| C  | -0.02706300 | 1.43128400  | -0.19152800 | C | 1.39062300  | -7.78675700 | -0.31247800 |
| C  | -1.29955600 | 3.53862200  | -0.23961300 | C | -1.39060200 | 7.78691400  | -0.31341100 |
| C  | -1.25321700 | 0.69224600  | -0.19768000 | C | -2.57537200 | 5.64768300  | -0.28554500 |
| C  | -2.52304100 | 2.80120600  | -0.24185500 | C | -3.77124000 | 3.49189900  | -0.26640000 |
| C  | -2.50662100 | 1.38442000  | -0.21737400 | C | -4.96410400 | 1.33248700  | -0.26640000 |
| C  | 2.45257100  | 1.47843200  | -0.21668400 | C | -6.15230900 | -0.82764000 | -0.28537000 |
| C  | 1.22616300  | 0.73911700  | -0.19685000 | C | -7.33233900 | -2.96948200 | -0.31287900 |
| C  | 3.68763100  | 0.78430400  | -0.24219000 | C | 7.37862000  | 1.57816300  | -0.30656400 |
| C  | 1.25323400  | -0.69213200 | -0.19240000 | C | 6.17935900  | -0.59362200 | -0.28532400 |
| C  | 3.71478400  | -0.64383400 | -0.24001400 | C | 4.98867200  | -2.75502100 | -0.27661100 |
| C  | 2.50670100  | -1.38433400 | -0.22059300 | C | 3.79305100  | -4.91365300 | -0.28549000 |
| C  | -1.32796700 | 4.96503000  | -0.26725100 | C | 2.59313300  | -7.08504100 | -0.30711800 |
| C  | 4.91021300  | 1.51982700  | -0.26625300 | C | -2.59310900 | 7.08519100  | -0.30745300 |
| C  | -1.22611100 | -0.73899300 | -0.19149800 | C | -3.79299700 | 4.91378400  | -0.28541600 |
| C  | -2.45258300 | -1.47835900 | -0.21977100 | C | -4.98859300 | 2.75510800  | -0.27651900 |
| C  | 0.02708400  | -1.43118900 | -0.19682400 | C | -6.17931800 | 0.59370000  | -0.28530800 |
| C  | -2.41502900 | -2.89472200 | -0.23966400 | C | -7.37859700 | -1.57808400 | -0.30700300 |
| C  | 0.05428900  | -2.86281500 | -0.21656200 | C | -3.87625200 | 7.74498200  | -0.32458500 |
| C  | -1.16467100 | -3.58523500 | -0.24159900 | C | -5.05612200 | 5.60007600  | -0.30687900 |
| C  | -3.71471400 | 0.64390500  | -0.24200000 | C | -6.24445700 | 3.44868400  | -0.29961400 |
| C  | -3.68762500 | -0.78424100 | -0.24007000 | C | -7.43292200 | 1.29724100  | -0.30658800 |
| C  | 2.52313000  | -2.80109300 | -0.23988600 | C | -8.62033900 | -0.84361600 | -0.32404000 |
| C  | 1.29960200  | -3.53844900 | -0.24179900 | C | 8.62036800  | 0.84370400  | -0.32364800 |
| C  | -3.63631400 | -3.63229500 | -0.26742000 | C | 7.43296500  | -1.29715000 | -0.30696100 |
| C  | -3.60373400 | -5.05395900 | -0.28565700 | C | 6.24453800  | -3.44859900 | -0.30034500 |
| C  | -4.88049400 | -2.94226100 | -0.27661500 | C | 5.05616700  | -5.59996200 | -0.30728300 |
| C  | -4.84003800 | -5.78779300 | -0.30758800 | C | 3.87627200  | -7.74485300 | -0.32425500 |
| C  | -6.10940100 | -3.68293800 | -0.30039000 | C | 8.64610200  | -0.51625700 | -0.32394300 |
| C  | -6.04902500 | -5.09756800 | -0.31322900 | C | 7.43959900  | -2.68927300 | -0.31279200 |
| C  | -1.13866800 | -5.01163900 | -0.26632500 | C | 6.23810500  | -4.86435600 | -0.31297600 |
| C  | 0.10803600  | -5.69717600 | -0.27678500 | C | 5.04117700  | -7.04251700 | -0.32446100 |
| C  | -2.35939000 | -5.74120500 | -0.28579400 | C | -5.04114500 | 7.04263600  | -0.32416400 |
| C  | 0.13536700  | -7.13166200 | -0.30015600 | C | -6.23805700 | 4.86446300  | -0.31198300 |
| C  | -2.32223900 | -7.17829900 | -0.30746100 | C | -7.43955500 | 2.68937600  | -0.31180500 |
| C  | -1.09420400 | -7.83391000 | -0.31271400 | C | -8.64606700 | 0.51634700  | -0.32368200 |
| C  | 1.32802300  | -4.96487000 | -0.26625900 | C | -0.78090300 | 1.18509200  | 3.15205300  |
| C  | -4.91019200 | -1.51976600 | -0.26738600 | C | -1.41759600 | -0.08411100 | 3.15313700  |
| C  | -4.76999100 | -7.22887100 | -0.32506800 | C | -0.63691900 | -1.26982700 | 3.15314100  |
| C  | -3.57934300 | -7.88646500 | -0.32485600 | C | 0.78038100  | -1.18673700 | 3.15106600  |
| Cr | 0.00003900  | 0.00003100  | 1.52911500  | C | 1.41702000  | 0.08238900  | 3.15379700  |
| C  | 7.33236300  | 2.96956400  | -0.31181200 | C | 0.63633600  | 1.26817300  | 3.15480300  |
| C  | 6.15234500  | 0.82771600  | -0.28536400 | H | -1.37681100 | 2.09031200  | 3.08675000  |
| C  | 4.96415600  | -1.33242000 | -0.26759800 | H | -2.49957800 | -0.14744300 | 3.08944500  |

|           |             |             |             |   |              |             |             |
|-----------|-------------|-------------|-------------|---|--------------|-------------|-------------|
| H         | -1.12341800 | -2.23836900 | 3.08919000  | C | -9.86887600  | -2.78134000 | -0.22965100 |
| H         | 1.37630500  | -2.09188500 | 3.08500900  | H | -10.95628400 | -2.81360900 | -0.24498400 |
| H         | 2.49903400  | 0.14577100  | 3.09066000  | H | -9.59917800  | -7.37628700 | -0.26611200 |
| H         | 1.12281900  | 2.23681300  | 3.09225000  | H | -10.88931200 | -5.28927900 | -0.26131300 |
| H         | 5.99505600  | -7.56424500 | -0.33866600 | C | -6.89937000  | -7.58485100 | -0.24083600 |
| H         | 3.89277900  | -8.83191500 | -0.33857300 | C | -5.47379200  | -7.58011000 | -0.22696600 |
| H         | 7.19012000  | -5.39073800 | -0.32980600 | C | -4.79505000  | -6.31384300 | -0.20274700 |
| H         | 8.39216900  | -3.21466000 | -0.32961700 | H | -7.41428600  | -8.54307100 | -0.25791400 |
| H         | 9.59566700  | -1.04568300 | -0.33825700 | C | -3.37525500  | -6.27524800 | -0.18953300 |
| H         | 9.54910900  | 1.40887700  | -0.33811700 | C | -2.69760100  | -5.01539700 | -0.16237400 |
| H         | 8.26407300  | 3.53103500  | -0.32916300 | C | -3.44573000  | -3.80788800 | -0.15349400 |
| H         | 6.98015100  | 5.66015500  | -0.32956600 | C | -3.52609400  | -1.33692600 | -0.12682100 |
| H         | 5.70320500  | 7.78688400  | -0.33924800 | C | -2.77199100  | -2.55696400 | -0.12181300 |
| H         | 3.55479700  | 8.97358000  | -0.33970800 | C | -1.35742500  | -2.52364400 | -0.10499100 |
| H         | 1.07448500  | 8.92172400  | -0.33082400 | C | -0.67738900  | -1.25934900 | -0.07584100 |
| H         | -1.41166000 | 8.87454100  | -0.33055100 | C | -0.60533700  | -3.72225900 | -0.12211800 |
| H         | -3.89277900 | 8.83204400  | -0.33897700 | C | 0.75198700   | -1.21632000 | -0.08566800 |
| H         | -5.99503700 | 7.56434600  | -0.33838100 | C | 0.82831300   | -3.67899200 | -0.12716700 |
| H         | -7.19008400 | 5.39082600  | -0.32897600 | C | 1.50679400   | -2.43712600 | -0.09832500 |
| H         | -8.39211600 | 3.21478200  | -0.32878500 | C | -2.86399400  | -0.08629800 | -0.09794900 |
| H         | -9.59563100 | 1.04578300  | -0.33797700 | C | -1.42931500  | -0.04305500 | -0.08572200 |
| H         | -9.54908600 | -1.40878100 | -0.33857500 | C | -3.60018500  | 1.12216100  | -0.12605800 |
| H         | -8.26406000 | -3.53094400 | -0.33012600 | C | -0.75181500  | 1.21631000  | -0.07645700 |
| H         | -6.98010500 | -5.66008900 | -0.33054200 | C | -2.92080600  | 2.38538500  | -0.12047600 |
| H         | -5.70313700 | -7.78678600 | -0.33971400 | C | -1.50667600  | 2.43721400  | -0.10442400 |
| H         | -3.55472600 | -8.97343500 | -0.33946500 | C | -1.27768900  | -4.97397700 | -0.15381500 |
| H         | -1.07442700 | -8.92155300 | -0.33004900 | C | -5.02051500  | 1.08025800  | -0.14532900 |
| H         | 1.41166300  | -8.87438000 | -0.32970000 | C | 1.42938700   | 0.04309300  | -0.07662000 |
|           |             |             |             | C | 2.86414600   | 0.08637200  | -0.10411500 |
|           |             |             |             | C | 0.67762300   | 1.25949000  | -0.08484100 |
|           |             |             |             | C | 3.52631200   | 1.33703000  | -0.12168100 |
|           |             |             |             | C | 1.35744500   | 2.52366600  | -0.09880500 |
|           |             |             |             | C | 2.77206700   | 2.55694800  | -0.12697500 |
|           |             |             |             | C | 2.92088800   | -2.38523800 | -0.12595600 |
|           |             |             |             | C | 3.60041100   | -1.12209900 | -0.12098200 |
|           |             |             |             | C | -0.82822600  | 3.67914500  | -0.12164700 |
|           |             |             |             | C | 0.60543600   | 3.72223600  | -0.12729600 |
|           |             |             |             | C | 4.94653000   | 1.38053100  | -0.15077600 |
|           |             |             |             | C | 5.61938400   | 2.63985500  | -0.16840400 |
|           |             |             |             | C | 5.69232100   | 0.17155900  | -0.15716600 |
|           |             |             |             | C | 7.04409300   | 2.68050900  | -0.19082600 |
|           |             |             |             | C | 7.12225000   | 0.21459900  | -0.18087100 |
|           |             |             |             | C | 7.79142100   | 1.46741400  | -0.19457800 |
|           |             |             |             | C | 3.44589600   | 3.80792000  | -0.14962700 |
|           |             |             |             | C | 2.69767900   | 5.01535600  | -0.16437600 |
| <b>15</b> |             |             |             |   |              |             |             |
| C         | -9.08857900 | -6.41645600 | -0.25082900 |   |              |             |             |
| C         | -7.64240600 | -6.41719200 | -0.23449700 |   |              |             |             |
| C         | -6.96883700 | -5.14012000 | -0.21233600 |   |              |             |             |
| C         | -7.71288800 | -3.93621000 | -0.20970000 |   |              |             |             |
| C         | -9.15652600 | -3.96791400 | -0.22892300 |   |              |             |             |
| C         | -9.80241700 | -5.26166200 | -0.24801100 |   |              |             |             |
| C         | -5.54620900 | -5.10311000 | -0.19500900 |   |              |             |             |
| C         | -7.04400000 | -2.68044500 | -0.18980700 |   |              |             |             |
| C         | -5.61921900 | -2.63980800 | -0.17010600 |   |              |             |             |
| C         | -4.87299700 | -3.84686900 | -0.17020100 |   |              |             |             |
| C         | -4.94638800 | -1.38050600 | -0.14715200 |   |              |             |             |
| C         | -5.69209100 | -0.17149100 | -0.15929100 |   |              |             |             |
| C         | -7.12205600 | -0.21453200 | -0.17909600 |   |              |             |             |
| C         | -7.79128800 | -1.46732600 | -0.19363700 |   |              |             |             |
| C         | -9.22741500 | -1.50838300 | -0.21424100 |   |              |             |             |

|    |             |             |             |   |              |              |             |
|----|-------------|-------------|-------------|---|--------------|--------------|-------------|
| C  | 4.87314500  | 3.84688400  | -0.17166500 | C | 7.19268100   | -2.25157000  | -0.18505600 |
| C  | 3.37533800  | 6.27523500  | -0.18748200 | C | 9.30161200   | -0.95033100  | -0.21198800 |
| C  | 5.54634600  | 5.10317100  | -0.19370900 | H | -11.03106900 | -0.33221700  | -0.23610500 |
| C  | 4.79515500  | 6.31386500  | -0.20155400 | H | -5.22772400  | -9.71920500  | -0.25562500 |
| C  | 1.27778300  | 4.97406200  | -0.14987700 | C | -2.52541300  | -9.93737700  | -0.24216900 |
| C  | 5.02065700  | -1.08014400 | -0.14911400 | C | -0.44745500  | -8.64756900  | -0.21402500 |
| C  | 7.71302500  | 3.93632700  | -0.20996900 | C | 1.64633600   | -7.35465800  | -0.19159400 |
| C  | 6.96868900  | 5.14010600  | -0.21181300 | C | 3.74690100   | -6.06054200  | -0.18058700 |
| C  | 7.64240200  | 6.41717300  | -0.23369000 | C | 5.84346500   | -4.75996500  | -0.18466200 |
| C  | 6.89939300  | 7.58482100  | -0.23893700 | C | 7.93591400   | -3.46484100  | -0.20051600 |
| C  | 9.08853200  | 6.41646900  | -0.25028500 | C | 10.01848400  | -2.18245500  | -0.22334100 |
| C  | 9.15656100  | 3.96799400  | -0.22956600 | C | -10.01832400 | 2.18252900   | -0.22160500 |
| C  | 9.86898300  | 2.78144200  | -0.23139800 | C | -7.93576500  | 3.46492500   | -0.20016500 |
| C  | 9.80243800  | 5.26173700  | -0.24848600 | C | -5.84332700  | 4.76005200   | -0.18578300 |
| C  | 5.47386100  | 7.58011900  | -0.22525900 | C | -3.74681200  | 6.06066700   | -0.18237200 |
| C  | 9.22754400  | 1.50848700  | -0.21573800 | C | -1.64623100  | 7.35471600   | -0.19266000 |
| Cr | -0.00008200 | -0.00000100 | 1.62907800  | C | 0.44755300   | 8.64761600   | -0.21356100 |
| C  | -9.94383300 | -0.29942400 | -0.22022200 | C | 2.52553100   | 9.93740300   | -0.24030800 |
| C  | -7.86544600 | 0.99571800  | -0.19043300 | C | -9.37865300  | 3.40978900   | -0.21792500 |
| C  | -5.76791100 | 2.29677300  | -0.16575200 | C | -7.26536000  | 4.71139700   | -0.20083700 |
| C  | -3.66863800 | 3.59353000  | -0.14991800 | C | -5.16639800  | 6.01380600   | -0.19253800 |
| C  | -1.57468200 | 4.88803100  | -0.15203000 | C | -3.07038500  | 7.30956400   | -0.19631600 |
| C  | 0.52361500  | 6.18632700  | -0.17273700 | C | -0.96713000  | 8.60500500   | -0.21198900 |
| C  | 2.62497800  | 7.48113200  | -0.20217100 | C | 1.14174500   | 9.91369500   | -0.23561700 |
| C  | 4.71257900  | 8.76137000  | -0.23524700 | C | -1.14162400  | -9.91366300  | -0.23634500 |
| C  | -4.71248000 | -8.76133300 | -0.23769700 | C | 0.96723500   | -8.60494600  | -0.21166400 |
| C  | -2.62487900 | -7.48112300 | -0.20334400 | C | 3.07049200   | -7.30947000  | -0.19539900 |
| C  | -0.52352700 | -6.18630600 | -0.17123900 | C | 5.16650400   | -6.01370800  | -0.19158400 |
| C  | 1.57475500  | -4.88799500 | -0.14838000 | C | 7.26550600   | -4.71130500  | -0.20042300 |
| C  | 3.66880700  | -3.59343900 | -0.14626500 | C | 9.37881400   | -3.40970800  | -0.21855000 |
| C  | 5.76809000  | -2.29668300 | -0.16418200 | H | -11.10570600 | 2.14920400   | -0.23618200 |
| C  | 7.86561800  | -0.99564400 | -0.19141900 | H | -3.04114300  | -10.89517300 | -0.25934500 |
| C  | 9.94396000  | 0.29952000  | -0.22249700 | C | -0.34397900  | -11.11986400 | -0.25327000 |
| C  | -9.30144200 | 0.95041700  | -0.21047400 | C | 1.73646300   | -9.82686200  | -0.23138300 |
| C  | -7.19252900 | 2.25165600  | -0.18390800 | C | 3.82778300   | -8.53033700  | -0.21644200 |
| C  | -5.09570900 | 3.54659400  | -0.16401800 | C | 5.92021600   | -7.23682900  | -0.21202600 |
| C  | -2.99455800 | 4.84390800  | -0.15757200 | C | 8.01482500   | -5.94557700  | -0.21850400 |
| C  | -0.89486100 | 6.14363100  | -0.16935400 | C | 10.10133700  | -4.66235600  | -0.23308700 |
| C  | 1.20071300  | 7.44053200  | -0.19476600 | C | -10.10119600 | 4.66241900   | -0.23274800 |
| C  | 3.30735600  | 8.74541700  | -0.22593000 | C | -8.01469800  | 5.94565700   | -0.21934700 |
| C  | -3.30724900 | -8.74540700 | -0.22761900 | C | -5.92011200  | 7.23691900   | -0.21368300 |
| C  | -1.20061800 | -7.44048800 | -0.19609800 | C | -3.82767400  | 8.53043500   | -0.21807900 |
| C  | 0.89494700  | -6.14354800 | -0.17125400 | C | -1.73634700  | 9.82693600   | -0.23217600 |
| C  | 2.99463500  | -4.84375400 | -0.16004400 | C | 0.34412100   | 11.11990800  | -0.25287100 |
| C  | 5.09584300  | -3.54648500 | -0.16580200 | C | 1.01298900   | -11.07892400 | -0.25079000 |

|   |              |              |             |
|---|--------------|--------------|-------------|
| C | 3.11918800   | -9.76720200  | -0.23231400 |
| C | 5.23144000   | -8.46172400  | -0.22241600 |
| C | 7.34344000   | -7.15579700  | -0.22293500 |
| C | 9.45827700   | -5.85796000  | -0.23294800 |
| C | -9.45814500  | 5.85802900   | -0.23365600 |
| C | -7.34331900  | 7.15588100   | -0.22492300 |
| C | -5.23131200  | 8.46179900   | -0.22490800 |
| C | -3.11906300  | 9.76728900   | -0.23427700 |
| C | -1.01284600  | 11.07898600  | -0.25145900 |
| H | -11.18779900 | 4.62460300   | -0.24474800 |
| H | -10.02552100 | 6.78547500   | -0.24616800 |
| H | -7.91483700  | 8.08152200   | -0.23983400 |
| H | -5.80313400  | 9.38706000   | -0.24113500 |
| H | -3.69139000  | 10.69241300  | -0.25005700 |
| H | -1.58876500  | 12.00114900  | -0.26554300 |
| H | 10.02564200  | -6.78541600  | -0.24520200 |
| H | 7.91494000   | -8.08144900  | -0.23784400 |
| H | 5.80325300   | -9.38698800  | -0.23868300 |
| H | 3.69152500   | -10.69232000 | -0.24808300 |
| H | 1.58892600   | -12.00107900 | -0.26459400 |
| H | -0.86350300  | -12.07490400 | -0.26877400 |
| H | 0.86366600   | 12.07494000  | -0.26826600 |
| H | 3.04127900   | 10.89518700  | -0.25764200 |
| H | 5.22783300   | 9.71923500   | -0.25337100 |
| H | 7.41431300   | 8.54304800   | -0.25614600 |
| H | 9.59909200   | 7.37632300   | -0.26542100 |
| H | 10.88933000  | 5.28939800   | -0.26200900 |
| H | 10.95638700  | 2.81371900   | -0.24667300 |
| H | 11.03119800  | 0.33233500   | -0.23823800 |
| H | 11.10586800  | -2.14913200  | -0.23778900 |
| H | 11.18794000  | -4.62455500  | -0.24521200 |
| C | 0.10811100   | -1.41561600  | 3.26210800  |
| C | 1.27874100   | -0.61327500  | 3.26366500  |
| C | 1.16935000   | 0.80137500   | 3.26484200  |
| C | -0.11061700  | 1.41424600   | 3.26312500  |
| C | -1.28116300  | 0.61192900   | 3.26228900  |
| C | -1.17178000  | -0.80280800  | 3.26253800  |
| H | 0.19220700   | -2.49609800  | 3.19905900  |
| H | 2.25648600   | -1.08107100  | 3.20263900  |
| H | 2.06372200   | 1.41374600   | 3.20455700  |
| H | -0.19464500  | 2.49476700   | 3.20079700  |
| H | -2.25877600  | 1.07982800   | 3.20011200  |
| H | -2.06606500  | -1.41515800  | 3.20069200  |

**16-H**

|    |             |             |             |
|----|-------------|-------------|-------------|
| Cr | -0.00003900 | -0.00002000 | 0.94494900  |
| C  | 1.35033200  | 0.47725800  | -0.55111400 |
| C  | 0.26185300  | 1.40784800  | -0.55118400 |
| C  | -1.08842600 | 0.93074400  | -0.55083100 |
| C  | -1.35026600 | -0.47725300 | -0.55120400 |
| C  | -0.26182300 | -1.40780200 | -0.55121700 |
| C  | 1.08845900  | -0.93073100 | -0.55080500 |
| H  | 2.37277600  | 0.83870300  | -0.47361400 |
| H  | 0.46002400  | 2.47402600  | -0.47358600 |
| H  | -1.91264800 | 1.63547500  | -0.47301700 |
| H  | -2.37272700 | -0.83868200 | -0.47375100 |
| H  | -0.45997200 | -2.47399700 | -0.47368800 |
| H  | 1.91270400  | -1.63542800 | -0.47298600 |

**16-CH<sub>3</sub>**

|    |             |             |             |
|----|-------------|-------------|-------------|
| Cr | -0.00091100 | -0.00041300 | 1.06848300  |
| C  | 0.44668500  | 1.36997900  | -0.42389300 |
| C  | -0.95299000 | 1.06035400  | -0.44209400 |
| C  | -1.40963800 | -0.29834800 | -0.42473400 |
| C  | -0.44137200 | -1.35551800 | -0.44272600 |
| C  | 0.96359700  | -1.07129700 | -0.42419100 |
| C  | 1.39541200  | 0.29544600  | -0.44001100 |
| H  | -1.67973100 | 1.86861800  | -0.39007400 |
| H  | -0.77762000 | -2.38921600 | -0.39168000 |
| H  | 2.45866500  | 0.52057300  | -0.38563500 |
| C  | 0.91584700  | 2.81111000  | -0.33472400 |
| H  | 1.00504600  | 3.17488500  | 0.69833400  |
| H  | 1.89833000  | 2.93164500  | -0.80352300 |
| H  | 0.22015700  | 3.48126000  | -0.85129700 |
| C  | -2.89218400 | -0.61256300 | -0.33460400 |
| H  | -3.25169600 | -0.70970400 | 0.69919600  |
| H  | -3.48801900 | 0.17448100  | -0.80912400 |
| H  | -3.12421100 | -1.55394400 | -0.84427600 |
| C  | 1.97741400  | -2.19791500 | -0.33463000 |
| H  | 2.25463900  | -2.45067800 | 0.69824200  |
| H  | 1.58741600  | -3.11180600 | -0.79525300 |
| H  | 2.90225900  | -1.93369200 | -0.85884500 |

**16-NH<sub>2</sub>**

|    |             |             |             |
|----|-------------|-------------|-------------|
| Cr | 0.00039700  | 0.00076800  | 1.06437600  |
| C  | -0.14030200 | 1.41606600  | -0.42330200 |
| C  | -1.30928000 | 0.59159100  | -0.46728700 |
| C  | -1.15622900 | -0.83079100 | -0.42391700 |
| C  | 0.14137900  | -1.43223000 | -0.45831400 |
| C  | 1.29644600  | -0.58767100 | -0.42258700 |

|   |             |             |             |
|---|-------------|-------------|-------------|
| C | 1.16766800  | 0.83714000  | -0.46694400 |
| H | -2.29920600 | 1.03836800  | -0.40254000 |
| H | 0.24934200  | -2.51129000 | -0.37576300 |
| H | 2.04931200  | 1.47108600  | -0.40004400 |
| N | -0.27134800 | 2.82747700  | -0.21977100 |
| H | -1.17511400 | 3.16094300  | -0.54199600 |
| H | 0.44822800  | 3.33908200  | -0.72284600 |
| N | -2.30835400 | -1.65563900 | -0.21832600 |
| H | -2.17658200 | -2.57711500 | -0.62513000 |
| H | -3.13522900 | -1.24243800 | -0.63969500 |
| N | 2.58298400  | -1.18276700 | -0.21972400 |
| H | 3.32640300  | -0.54838900 | -0.49653000 |
| H | 2.68225000  | -2.03679300 | -0.76161000 |

#### 16-OMe

|    |             |             |             |
|----|-------------|-------------|-------------|
| Cr | -0.00100400 | -0.00078800 | 1.40562000  |
| C  | -1.34853500 | -0.44963000 | -0.07332400 |
| C  | -0.28922300 | -1.41116400 | -0.10209600 |
| C  | 1.06297300  | -0.94413000 | -0.07185500 |
| C  | 1.36599800  | 0.45400200  | -0.10077400 |
| C  | 0.28546000  | 1.39153300  | -0.07208400 |
| C  | -1.07691200 | 0.95487800  | -0.10237600 |
| H  | -0.50625600 | -2.47039300 | -0.00931500 |
| H  | 2.39173700  | 0.79566800  | -0.00675400 |
| H  | -1.88566900 | 1.67247900  | -0.00935700 |
| O  | -2.65643400 | -0.88482600 | 0.10302500  |
| O  | 2.09389900  | -1.85922400 | 0.10385400  |
| O  | 0.56228900  | 2.74172600  | 0.10494200  |
| C  | -3.34453200 | -1.11955100 | -1.12185600 |
| H  | -4.35142900 | -1.45262100 | -0.85784000 |
| H  | -3.41081300 | -0.20282700 | -1.72426400 |
| H  | -2.84760400 | -1.89931900 | -1.71577100 |
| C  | 2.64661100  | -2.32953100 | -1.12180800 |
| H  | 3.44087900  | -3.03284800 | -0.85918100 |
| H  | 1.88965500  | -2.84558100 | -1.72881400 |
| H  | 3.07133700  | -1.50446400 | -1.71050500 |
| C  | 0.70074000  | 3.45572000  | -1.11981900 |
| H  | 0.91562000  | 4.49425000  | -0.85569500 |
| H  | 1.52709000  | 3.05549500  | -1.72372900 |
| H  | -0.22394900 | 3.41491000  | -1.71225700 |

#### 16-F

|    |             |             |             |
|----|-------------|-------------|-------------|
| Cr | 0.00008800  | -0.00018600 | 1.06718000  |
| C  | -0.42340500 | 1.32873200  | -0.43230800 |
| C  | -1.41379500 | 0.30901500  | -0.45907700 |

|   |             |             |             |
|---|-------------|-------------|-------------|
| C | -0.93901000 | -1.03086800 | -0.43232700 |
| C | 0.43934700  | -1.37889800 | -0.45953000 |
| C | 1.36227600  | -0.29772400 | -0.43216700 |
| C | 0.97439600  | 1.06987500  | -0.45926400 |
| H | -2.47178300 | 0.54011900  | -0.42537200 |
| H | 0.76797100  | -2.41077700 | -0.42587700 |
| H | 1.70376900  | 1.87036300  | -0.42569100 |
| F | -0.83492100 | 2.62085300  | -0.30717100 |
| F | 2.68712900  | -0.58715900 | -0.30674100 |
| F | -1.85231000 | -2.03325400 | -0.30690300 |

#### 16-Cl

|    |             |             |             |
|----|-------------|-------------|-------------|
| Cr | 0.00000000  | -0.00010900 | 1.09799000  |
| C  | -1.38314200 | -0.25695500 | -0.38786400 |
| C  | -0.48182300 | -1.36201900 | -0.40417700 |
| C  | 0.91380200  | -1.06949700 | -0.38779700 |
| C  | 1.41997700  | 0.26369300  | -0.40422300 |
| C  | 0.46904300  | 1.32620800  | -0.38802000 |
| C  | -0.93846700 | 1.09804300  | -0.40405400 |
| H  | -0.84246600 | -2.38183700 | -0.34525400 |
| H  | 2.48327200  | 0.46131000  | -0.34537000 |
| H  | -1.64131800 | 1.92017100  | -0.34512800 |
| Cl | 2.05919500  | -2.40856200 | -0.21656600 |
| Cl | -3.11562400 | -0.57860000 | -0.21696900 |
| Cl | 1.05667400  | 2.98752300  | -0.21700700 |

#### 16-Br

|    |             |             |             |
|----|-------------|-------------|-------------|
| Cr | 0.00016600  | -0.00023900 | 1.12904300  |
| C  | 1.28773500  | -0.56547300 | -0.34807700 |
| C  | 1.16422900  | 0.85517500  | -0.36498700 |
| C  | -0.15439700 | 1.39781400  | -0.34796100 |
| C  | -1.32276100 | 0.58052000  | -0.36485700 |
| C  | -1.13323300 | -0.83276800 | -0.34781000 |
| C  | 0.15869500  | -1.43645100 | -0.36460000 |
| H  | 2.03537800  | 1.49484900  | -0.29995100 |
| H  | -2.31232300 | 1.01464500  | -0.29991700 |
| H  | 0.27718900  | -2.51083700 | -0.29943300 |
| Br | -0.36463100 | 3.29960600  | -0.12673700 |
| Br | 3.04055900  | -1.33395500 | -0.12739000 |
| Br | -2.67609500 | -1.96524600 | -0.12781500 |

#### 16-CO<sub>2</sub>Me

|    |             |             |             |
|----|-------------|-------------|-------------|
| Cr | -0.00020500 | 0.00008300  | 1.16785200  |
| C  | 1.15152500  | -0.85895100 | -0.35788500 |
| C  | 1.31058800  | 0.56485700  | -0.32245700 |

|              |             |             |             |             |             |             |             |
|--------------|-------------|-------------|-------------|-------------|-------------|-------------|-------------|
| C            | 0.16801500  | 1.42655600  | -0.35819000 | N           | -0.70488900 | 3.96073600  | -0.22813500 |
| C            | -1.14460900 | 0.85251300  | -0.32262300 |             |             |             |             |
| C            | -1.31962500 | -0.56788500 | -0.35815400 | <b>17-H</b> |             |             |             |
| C            | -0.16615700 | -1.41747000 | -0.32275100 | C           | -0.50247500 | -1.33843100 | -0.39804100 |
| H            | 2.30854500  | 0.97586100  | -0.23324800 | C           | -1.41083700 | -0.23398900 | -0.39770600 |
| H            | -1.99952100 | 1.51128700  | -0.23346000 | C           | 0.90827400  | -1.10413800 | -0.39794300 |
| H            | -0.30948400 | -2.48718700 | -0.23337400 | C           | -0.90849300 | 1.10480800  | -0.39748300 |
| C            | -2.65114900 | -1.21038600 | -0.22188400 | C           | 1.41066700  | 0.23461800  | -0.39765400 |
| C            | 2.37363200  | -1.69074500 | -0.22126300 | C           | 0.50228900  | 1.33914400  | -0.39757200 |
| C            | 0.27750400  | 2.90097600  | -0.22219900 | Cr          | 0.00004600  | -0.00005000 | 1.30513300  |
| O            | -2.83390000 | -2.40995600 | -0.12084600 | C           | -1.82286600 | 2.21660700  | -0.41608900 |
| O            | 2.09788100  | -3.01753600 | -0.22937500 | C           | -3.21724600 | 1.97498500  | -0.43751500 |
| O            | -0.66994900 | 3.65909000  | -0.12134700 | C           | -2.83084200 | -0.46997100 | -0.41606400 |
| O            | -3.66201100 | -0.30795700 | -0.22890500 | C           | -3.72226200 | 0.62927500  | -0.43693400 |
| O            | 3.50370900  | -1.24906900 | -0.11903100 | C           | 2.83064400  | 0.47069300  | -0.41602900 |
| O            | 1.56451200  | 3.32520900  | -0.22909700 | C           | 3.72208300  | -0.62860200 | -0.43711300 |
| C            | -4.97932800 | -0.86350400 | -0.10877500 | C           | 1.82266800  | -2.21598800 | -0.41684300 |
| H            | -5.08884300 | -1.39818700 | 0.83912200  | C           | 3.21705200  | -1.97425300 | -0.43801500 |
| H            | -5.65942900 | -0.01208100 | -0.14909100 | C           | -1.31644300 | 3.53809400  | -0.43685500 |
| H            | -5.18075800 | -1.55623700 | -0.93019900 | C           | 0.10146100  | 3.77366400  | -0.43611900 |
| C            | 1.74177100  | 4.74385000  | -0.10914000 | C           | 1.00799900  | 2.68677700  | -0.41530800 |
| H            | 1.33357200  | 5.10606500  | 0.83878000  | C           | 3.31871400  | 1.79903200  | -0.43589300 |
| H            | 2.81912700  | 4.90742600  | -0.14968800 | C           | 2.40557400  | 2.90920600  | -0.43571600 |
| H            | 1.24223800  | 5.26439100  | -0.93053900 | C           | 1.31625000  | -3.53742400 | -0.43784100 |
| C            | 3.23811300  | -3.88006700 | -0.11013600 | C           | -0.10163600 | -3.77298300 | -0.43717500 |
| H            | 2.84130600  | -4.89495600 | -0.15095700 | C           | -1.00816000 | -2.68614500 | -0.41615700 |
| H            | 3.93823700  | -3.70722900 | -0.93182500 | C           | -3.31890700 | -1.79836800 | -0.43624100 |
| H            | 3.75630300  | -3.70786600 | 0.83759100  | C           | -2.40576900 | -2.90847600 | -0.43639300 |
|              |             |             |             | C           | 2.90361500  | 4.24894600  | -0.45949600 |
| <b>16-CN</b> |             |             |             | C           | 4.32999700  | 4.44367600  | -0.47724400 |
| Cr           | -0.00021300 | 0.00006100  | 1.09543000  | C           | 5.19561600  | 3.39105900  | -0.47826600 |
| C            | -1.09798400 | -0.92432500 | -0.42919600 | C           | 5.13124200  | -0.38993900 | -0.46255500 |
| C            | 0.25120700  | -1.41134200 | -0.39455900 | C           | 6.01307900  | -1.52788900 | -0.48140300 |
| C            | 1.34951300  | -0.48881300 | -0.42885000 | C           | 5.60218700  | 0.93121600  | -0.47074600 |
| C            | 1.09675500  | 0.92307000  | -0.39448400 | C           | 4.12162100  | -3.08099800 | -0.46315400 |
| C            | -0.25136500 | 1.41305700  | -0.42917400 | C           | 5.53425700  | -2.80391700 | -0.48161800 |
| C            | -1.34766000 | 0.48812500  | -0.39512100 | C           | 4.72932200  | 2.02913100  | -0.46111200 |
| H            | 0.44065500  | -2.47616800 | -0.31482700 | H           | 6.26864000  | 3.56667100  | -0.49486500 |
| H            | 1.92416300  | 1.61958500  | -0.31467200 | H           | 6.67532400  | 1.10972500  | -0.48934300 |
| H            | -2.36459700 | 0.85642600  | -0.31572500 | H           | 7.08511100  | -1.34656700 | -0.49841700 |
| C            | -2.18996600 | -1.84356900 | -0.31851200 | H           | 6.22253700  | -3.64558500 | -0.49893700 |
| C            | 2.69162500  | -0.97484100 | -0.31811400 | C           | -4.12173900 | 3.08174200  | -0.46251100 |
| C            | -0.50146900 | 2.81834100  | -0.31837000 | C           | -5.53440200 | 2.80473000  | -0.48117400 |
| N            | -3.07766000 | -2.59078300 | -0.22765100 | C           | -2.90387600 | -4.24823700 | -0.46047100 |
| N            | 3.78268500  | -1.36988600 | -0.22804600 | C           | -4.33025200 | -4.44289200 | -0.47813400 |

|   |             |             |             |    |             |             |             |
|---|-------------|-------------|-------------|----|-------------|-------------|-------------|
| C | -5.13146700 | 0.39081400  | -0.46250000 | C  | 1.41633200  | -0.19639600 | -0.52680200 |
| C | -6.01319100 | 1.52872900  | -0.48127800 | C  | 0.53743200  | -1.32473400 | -0.52561600 |
| C | -5.60240000 | -0.93041000 | -0.47091900 | C  | 0.87857200  | 1.12839700  | -0.52756600 |
| C | -4.72954200 | -2.02826100 | -0.46148200 | C  | -0.87888700 | -1.12801000 | -0.52669800 |
| C | -5.19592600 | -3.39024600 | -0.47885200 | C  | -0.53816900 | 1.32504400  | -0.52706500 |
| H | -7.08526400 | 1.34758700  | -0.49845000 | C  | -1.41686700 | 0.19693600  | -0.52816000 |
| H | -6.67555200 | -1.10882500 | -0.48957500 | Cr | -0.00019300 | 0.00166100  | 1.18223100  |
| H | -6.26896700 | -3.56567700 | -0.49533600 | C  | -1.76370200 | -2.26307800 | -0.57145000 |
| H | -4.70947000 | -5.46192400 | -0.49410600 | C  | -1.22287000 | -3.57087500 | -0.60094600 |
| C | 0.60765700  | 5.11029400  | -0.45961200 | C  | 1.07826400  | -2.65829200 | -0.57068800 |
| C | 1.99491700  | 5.31733500  | -0.46745600 | C  | 0.20082000  | -3.76886600 | -0.59989300 |
| C | -0.33861400 | 6.19519200  | -0.47724300 | C  | -1.07881700 | 2.65858500  | -0.57219900 |
| C | -3.60727700 | 4.38657600  | -0.47057600 | C  | -0.20153500 | 3.76893200  | -0.61490300 |
| C | -2.22765600 | 4.63931600  | -0.46127000 | C  | 1.76308100  | 2.26341700  | -0.57314000 |
| C | -1.68299200 | 5.97184300  | -0.47824400 | C  | 1.22227400  | 3.57089800  | -0.61621500 |
| C | 3.60711900  | -4.38584800 | -0.47152100 | C  | -3.16364600 | -2.05857800 | -0.61917600 |
| C | 2.22757400  | -4.63860800 | -0.46236000 | C  | -3.70418600 | -0.72667500 | -0.62103300 |
| C | 1.68284000  | -5.97119100 | -0.47953200 | C  | -2.84206700 | 0.39523700  | -0.57495300 |
| C | -1.99512500 | -5.31662800 | -0.46869600 | C  | -2.48183000 | 2.84419600  | -0.60368700 |
| C | -0.60794200 | -5.10962400 | -0.46089800 | C  | -3.36524400 | 1.71034400  | -0.60565900 |
| C | 0.33841300  | -6.19454800 | -0.47867500 | C  | 3.16345000  | 2.05896900  | -0.60672700 |
| H | -2.37715800 | -6.33525600 | -0.48648700 | C  | 3.70389700  | 0.72714100  | -0.60743700 |
| H | -0.04616100 | -7.21156500 | -0.49471000 | C  | 2.84159400  | -0.39495900 | -0.57395200 |
| H | 2.37569600  | -6.80911200 | -0.49635600 | C  | 2.48094500  | -2.84380100 | -0.61612500 |
| H | 4.29806500  | -5.22613100 | -0.49033800 | C  | 3.36452200  | -1.70980000 | -0.61863600 |
| C | 1.32549400  | -0.51239600 | 2.93586600  | C  | -4.78100700 | 1.90295900  | -0.65262100 |
| C | 1.10430600  | 0.88948000  | 2.93784600  | C  | -5.28327200 | 3.25188500  | -0.67847100 |
| C | -0.22041600 | 1.39915800  | 2.93951100  | C  | -4.44582600 | 4.32693900  | -0.67523200 |
| C | -1.32393300 | 0.50652000  | 2.93911900  | C  | -0.74275600 | 5.09112600  | -0.65849100 |
| C | -1.10283500 | -0.89547900 | 2.93524100  | C  | 0.17450600  | 6.20033200  | -0.69415300 |
| C | 0.22198900  | -1.40501700 | 2.93387700  | C  | -2.13493000 | 5.26185500  | -0.66668800 |
| H | 2.33692700  | -0.90143800 | 2.87006300  | C  | 2.10391000  | 4.69503700  | -0.66221700 |
| H | 1.94667800  | 1.57131600  | 2.87338900  | C  | 1.52423600  | 6.01260100  | -0.69618900 |
| H | -0.38983800 | 2.46972200  | 2.87705000  | C  | -3.01492100 | 4.17002100  | -0.64648800 |
| H | -2.33545000 | 0.89578000  | 2.87595100  | H  | -4.85148700 | 5.33549300  | -0.70172300 |
| H | -1.94522600 | -1.57704700 | 2.86859200  | H  | -2.54332500 | 6.26984000  | -0.69880700 |
| H | 0.39127500  | -2.47527100 | 2.86620800  | H  | -0.23664800 | 7.20664400  | -0.72371000 |
| H | -6.22274200 | 3.64634700  | -0.49842700 | H  | 2.19475100  | 6.86814500  | -0.72730000 |
| H | -4.29813400 | 5.22693300  | -0.48938800 | C  | -2.10453300 | -4.69522400 | -0.64692500 |
| H | -2.37569000 | 6.80992200  | -0.49504500 | C  | -1.52494800 | -6.01294300 | -0.67275800 |
| H | 0.04576200  | 7.21230800  | -0.49307800 | C  | 4.78002000  | -1.90229800 | -0.66747200 |
| H | 2.37685500  | 6.33600600  | -0.48514900 | C  | 5.28206100  | -3.25119000 | -0.70333900 |
| H | 4.70929300  | 5.46268600  | -0.49299900 | C  | 0.74203300  | -5.09127000 | -0.64404800 |
|   |             |             |             | C  | -0.17519100 | -6.20066200 | -0.67116300 |
|   |             |             |             | C  | 2.13395200  | -5.26156300 | -0.66741900 |

17-CH<sub>3</sub>



|   |             |             |             |                    |             |             |             |
|---|-------------|-------------|-------------|--------------------|-------------|-------------|-------------|
| C | 3.01382800  | -4.16935600 | -0.66095900 | C                  | 2.28967300  | -1.84765400 | 2.89723700  |
| C | 4.44459100  | -4.32617700 | -0.69987200 | H                  | 2.05619600  | -2.80607400 | 2.42373400  |
| H | 0.23594400  | -7.20706600 | -0.69785500 | H                  | 3.16686800  | -1.42667700 | 2.39656300  |
| H | 2.54233800  | -6.26951500 | -0.70065500 | H                  | 2.56872700  | -2.05193300 | 3.94032400  |
| H | 4.85006500  | -5.33466400 | -0.73113500 |                    |             |             |             |
| H | 6.35903900  | -3.39772400 | -0.73710600 | 17-NH <sub>2</sub> |             |             |             |
| C | -5.11835500 | -0.52522300 | -0.67037700 | C                  | -1.00866500 | 1.01437100  | -0.58053600 |
| C | -5.62446500 | 0.78284200  | -0.67861400 | C                  | 0.37345700  | 1.38151500  | -0.58016800 |
| C | -5.96963500 | -1.68560200 | -0.70983300 | C                  | -1.38255100 | -0.36825800 | -0.58218300 |
| C | -3.49001100 | -4.47920900 | -0.67313400 | C                  | 1.38395200  | 0.36649500  | -0.57983800 |
| C | -4.03824500 | -3.18815000 | -0.66680900 | C                  | -0.37358200 | -1.38140800 | -0.57989600 |
| C | -5.45739000 | -2.94843300 | -0.70807900 | C                  | 1.01086200  | -1.01379300 | -0.57993000 |
| C | 3.48977300  | 4.47935100  | -0.67382900 | Cr                 | -0.00125500 | 0.00014800  | 1.09003600  |
| C | 4.03828400  | 3.18868100  | -0.65326400 | C                  | 2.77479300  | 0.73513100  | -0.59016700 |
| C | 5.45760600  | 2.94908600  | -0.68503700 | C                  | 3.13479700  | 2.10495400  | -0.60599500 |
| C | 5.62397400  | -0.78213400 | -0.67935100 | C                  | 0.74805600  | 2.77053800  | -0.59044100 |
| C | 5.11832200  | 0.52580200  | -0.65643400 | C                  | 2.11954500  | 3.12460600  | -0.60605100 |
| C | 5.96982200  | 1.68621700  | -0.68672100 | C                  | -0.74972700 | -2.77018900 | -0.59085700 |
| H | 6.70104800  | -0.93199800 | -0.71529800 | C                  | -2.11957400 | -3.12505900 | -0.61071400 |
| H | 7.04594900  | 1.53310100  | -0.71730200 | C                  | -2.77292900 | -0.73820700 | -0.59191400 |
| H | 6.12310800  | 3.80857800  | -0.71423400 | C                  | -3.13388500 | -2.10636200 | -0.61116700 |
| H | 4.15803900  | 5.33729900  | -0.70805500 | C                  | 3.76702700  | -0.27366800 | -0.60933100 |
| C | 0.22311700  | 1.41295500  | 2.85122300  | C                  | 3.39186500  | -1.66140800 | -0.60895500 |
| C | -1.09397200 | 0.88244600  | 2.84269000  | C                  | 2.02644300  | -2.03285800 | -0.59000000 |
| C | -1.33456800 | -0.51747900 | 2.84690700  | C                  | 0.25658700  | -3.76691200 | -0.60563800 |
| C | -0.21650600 | -1.39331600 | 2.83722700  | C                  | 1.64734100  | -3.39756000 | -0.60515100 |
| C | 1.11576400  | -0.90184600 | 2.84405300  | C                  | -3.76527300 | 0.27244900  | -0.60711100 |
| C | 1.31490800  | 0.50449200  | 2.83920500  | C                  | -3.38975100 | 1.66147900  | -0.60645800 |
| H | -1.93918800 | 1.56440600  | 2.79320800  | C                  | -2.02332400 | 2.03452400  | -0.59099800 |
| H | -0.38486300 | -2.46583200 | 2.78166500  | C                  | -0.25634900 | 3.76721200  | -0.60957400 |
| H | 2.32828900  | 0.89495400  | 2.78821500  | C                  | -1.64581400 | 3.39821500  | -0.60955600 |
| H | -2.19547400 | -6.86859100 | -0.70064500 | C                  | 2.65883100  | -4.40735300 | -0.62284800 |
| H | -4.15826800 | -5.33714300 | -0.70791100 | C                  | 2.24227000  | -5.78555400 | -0.63480700 |
| H | -6.12273100 | -3.80789500 | -0.74142700 | C                  | 0.92488700  | -6.13541500 | -0.63525800 |
| H | -7.04562800 | -1.53243600 | -0.74444500 | C                  | -2.48754900 | -4.50593700 | -0.63057700 |
| H | -6.70155100 | 0.93271700  | -0.71412800 | C                  | -3.88981600 | -4.83466900 | -0.64556100 |
| H | -6.36038100 | 3.39849700  | -0.70746200 | C                  | -1.48250000 | -5.48387600 | -0.63318600 |
| C | 0.45741000  | 2.90221500  | 2.90933700  | C                  | -4.51641500 | -2.46824400 | -0.63110500 |
| H | -0.35438200 | 3.45636900  | 2.42819500  | C                  | -4.85128900 | -3.86899600 | -0.64578000 |
| H | 0.51614200  | 3.23967800  | 3.95351400  | C                  | -0.12059100 | -5.14551400 | -0.62370800 |
| H | 1.39512700  | 3.18072500  | 2.41889100  | H                  | 0.63869200  | -7.18468600 | -0.64904500 |
| C | -2.74220100 | -1.05706900 | 2.90237900  | H                  | -1.76606700 | -6.53445500 | -0.64869400 |
| H | -3.07303000 | -1.15584600 | 3.94563500  | H                  | -4.17093400 | -5.88530500 | -0.66096400 |
| H | -3.44688700 | -0.39185600 | 2.39407600  | H                  | -5.90317500 | -4.14536800 | -0.66146300 |
| H | -2.81369500 | -2.04550600 | 2.43837000  | C                  | 4.51734800  | 2.46761600  | -0.62479400 |

|   |             |             |             |               |             |             |             |
|---|-------------|-------------|-------------|---------------|-------------|-------------|-------------|
| C | 4.85192400  | 3.86795900  | -0.63784800 | H             | -2.91710500 | -1.67252200 | 3.14831100  |
| C | -2.65772500 | 4.40735200  | -0.62947000 | N             | 2.71882000  | -0.76122400 | 2.78688700  |
| C | -2.24121500 | 5.78603700  | -0.64409300 | H             | 3.35613700  | -0.07233500 | 3.16415900  |
| C | 2.48834100  | 4.50545000  | -0.62493700 | H             | 2.90490700  | -1.68622400 | 3.15133100  |
| C | 3.89021100  | 4.83385000  | -0.63791300 | N             | -0.70191900 | 2.73861900  | 2.78686100  |
| C | 1.48238300  | 5.48385800  | -0.63381800 | H             | -1.62066000 | 2.94577700  | 3.15570400  |
| C | 0.12151400  | 5.14538800  | -0.62988100 | H             | 0.00308800  | 3.36086600  | 3.15947700  |
| C | -0.92413500 | 6.13576600  | -0.64439300 |               |             |             |             |
| H | 4.17149200  | 5.88442200  | -0.65250500 | <b>17-OMe</b> |             |             |             |
| H | 1.76655100  | 6.53426300  | -0.65003000 | C             | -0.63216600 | 1.28311300  | -0.71317400 |
| H | -0.63774400 | 7.18498900  | -0.66008700 | C             | 0.79464200  | 1.18841900  | -0.71198200 |
| H | -3.01051600 | 6.55482500  | -0.65947300 | C             | -1.42724100 | 0.09287000  | -0.71174800 |
| C | 4.39653800  | -2.67774000 | -0.62872300 | C             | 1.42797500  | -0.09537500 | -0.71373500 |
| C | 4.00921500  | -4.02547900 | -0.63162400 | C             | -0.79602500 | -1.18992200 | -0.71242500 |
| C | 5.77710500  | -2.26745300 | -0.64357900 | C             | 0.63251500  | -1.28324600 | -0.71125500 |
| C | 5.49137000  | 1.45740100  | -0.63363300 | Cr            | 0.00052100  | 0.00048000  | 0.96941800  |
| C | 5.14692600  | 0.09803700  | -0.62954400 | C             | 2.86386200  | -0.19041000 | -0.74088800 |
| C | 6.13269700  | -0.95197200 | -0.64407400 | C             | 3.64276100  | 0.99150900  | -0.76899500 |
| C | -5.48999700 | -1.45897200 | -0.63444900 | C             | 1.59441700  | 2.38512000  | -0.74377300 |
| C | -5.14555700 | -0.09857400 | -0.62516900 | C             | 3.00690000  | 2.28180900  | -0.77023200 |
| C | -6.13084400 | 0.95126500  | -0.63722900 | C             | -1.59616900 | -2.38576900 | -0.73899300 |
| C | -4.00722400 | 4.02604200  | -0.63293300 | C             | -3.00703500 | -2.28404300 | -0.77031400 |
| C | -4.39510400 | 2.67742600  | -0.62447700 | C             | -2.86364800 | 0.18723400  | -0.74473200 |
| C | -5.77517100 | 2.26706500  | -0.63694000 | C             | -3.64237600 | -0.99459400 | -0.77469200 |
| H | -4.77520200 | 4.79696200  | -0.64853200 | C             | 3.48121400  | -1.46306300 | -0.77208800 |
| H | -6.54061600 | 3.03969000  | -0.65082000 | C             | 2.68207900  | -2.65779700 | -0.77343600 |
| H | -7.18132100 | 0.66965300  | -0.65146300 | C             | 1.26919000  | -2.57428100 | -0.74242000 |
| H | -6.54179700 | -1.73785200 | -0.65044100 | C             | -0.96197500 | -3.65132900 | -0.76516800 |
| C | -1.02209000 | -0.99576900 | 2.79565500  | C             | 0.47344100  | -3.74581700 | -0.76765300 |
| C | 0.34804000  | -1.37024600 | 2.76313200  | C             | -3.48033000 | 1.46218200  | -0.77141400 |
| C | 1.37046400  | -0.38425900 | 2.79758600  | C             | -2.68072900 | 2.65780500  | -0.76776000 |
| C | 1.00959300  | 0.98962500  | 2.76159800  | C             | -1.26760900 | 2.57418800  | -0.73934200 |
| C | -0.35535700 | 1.38229800  | 2.79758500  | C             | 0.96032000  | 3.65053900  | -0.77207200 |
| C | -1.36463400 | 0.38288500  | 2.75951900  | C             | -0.47411500 | 3.74508900  | -0.76898900 |
| H | 0.61677100  | -2.42244100 | 2.71248800  | C             | 1.10901900  | -5.02589100 | -0.80112600 |
| H | 1.78643400  | 1.74843500  | 2.70930500  | C             | 0.27410600  | -6.19869000 | -0.82154600 |
| H | -2.41022000 | 0.67602400  | 2.70636700  | C             | -1.08583400 | -6.10857600 | -0.81936100 |
| H | 5.90375400  | 4.14447200  | -0.65244900 | C             | -3.79754700 | -3.47442600 | -0.80232000 |
| H | 6.54300200  | 1.73690100  | -0.64992500 | C             | -5.23093500 | -3.33768100 | -0.82840100 |
| H | 7.18313100  | -0.67017600 | -0.65995200 | C             | -3.15798500 | -4.72190400 | -0.81008900 |
| H | 6.54243300  | -3.04020900 | -0.65895400 | C             | -5.06836800 | -0.89559600 | -0.80964400 |
| H | 4.77673900  | -4.79685500 | -0.64701300 | C             | -5.83360200 | -2.11545400 | -0.83205000 |
| H | 3.01145900  | -6.55444600 | -0.64824900 | C             | -1.75961500 | -4.83645800 | -0.79665700 |
| N | -2.02362700 | -1.97411800 | 2.78247000  | H             | -1.69252700 | -7.01089900 | -0.83983800 |
| H | -1.74651500 | -2.87153300 | 3.15796200  | H             | -3.76220200 | -5.62648400 | -0.83367700 |

|   |             |             |             |             |             |             |             |
|---|-------------|-------------|-------------|-------------|-------------|-------------|-------------|
| H | -5.83278800 | -4.24321000 | -0.84978800 | H           | 0.75706900  | -7.17282600 | -0.84391800 |
| H | -6.91830600 | -2.04111800 | -0.85667700 | O           | -2.48021300 | -1.24751500 | 2.72270900  |
| C | 5.06797700  | 0.89338400  | -0.80314200 | O           | 0.15854800  | 2.77550600  | 2.72093200  |
| C | 5.83284500  | 2.11277200  | -0.82695000 | O           | 2.32187200  | -1.52066200 | 2.72897100  |
| C | -1.10994100 | 5.02482200  | -0.80165100 | C           | -3.67263300 | -0.48330600 | 2.85901300  |
| C | -0.27483900 | 6.19774100  | -0.82521200 | H           | -3.84581800 | 0.15608200  | 1.98690900  |
| C | 3.79775300  | 3.47216200  | -0.80377500 | H           | -4.48158600 | -1.21169200 | 2.93349900  |
| C | 5.23091900  | 3.33556200  | -0.82697700 | H           | -3.64653900 | 0.12968000  | 3.76950500  |
| C | 3.15679700  | 4.72079700  | -0.81536100 | C           | 2.25537800  | -2.93548900 | 2.86722500  |
| C | 1.75906500  | 4.83597300  | -0.80540900 | H           | 1.78594800  | -3.40640000 | 1.99707300  |
| C | 1.08499700  | 6.10858800  | -0.82694000 | H           | 3.29048500  | -3.27267500 | 2.94043000  |
| H | 5.83298300  | 4.24090800  | -0.84978900 | H           | 1.71278500  | -3.21734200 | 3.77910900  |
| H | 3.76166400  | 5.62499500  | -0.84047900 | C           | 1.41677400  | 3.42575400  | 2.86002000  |
| H | 1.69152800  | 7.01101600  | -0.84987700 | H           | 2.06118600  | 3.25218200  | 1.99181700  |
| H | -0.75810600 | 7.17176200  | -0.84630300 | H           | 1.19079400  | 4.49093300  | 2.92899900  |
| C | 3.30943100  | -3.94224500 | -0.80755300 | H           | 1.93013300  | 3.09958800  | 3.77405000  |
| C | 2.51083400  | -5.09511400 | -0.81507400 |             |             |             |             |
| C | 4.74856900  | -3.99491300 | -0.83287500 | <b>17-F</b> |             |             |             |
| C | 5.66799100  | -0.37482700 | -0.81755500 | C           | 1.28513000  | 0.62645100  | -0.57093900 |
| C | 4.90736500  | -1.55234300 | -0.80712600 | C           | 1.18649600  | -0.79859500 | -0.56996900 |
| C | 5.50572500  | -2.86188100 | -0.83292700 | C           | 0.09789500  | 1.42608700  | -0.57095800 |
| C | -5.66747200 | 0.37242700  | -0.81982900 | C           | -0.09968200 | -1.42693300 | -0.56993500 |
| C | -4.90661800 | 1.55175800  | -0.80661300 | C           | -1.18561600 | 0.79898400  | -0.57018300 |
| C | -5.50504800 | 2.86104100  | -0.82952700 | C           | -1.28447600 | -0.62902100 | -0.57040900 |
| C | -2.51007800 | 5.09478700  | -0.81244500 | Cr          | 0.00001800  | 0.00064600  | 1.13532700  |
| C | -3.30848000 | 3.94110200  | -0.80089100 | C           | -0.19921000 | -2.86300900 | -0.58062600 |
| C | -4.74703700 | 3.99369900  | -0.82670000 | C           | 0.98077900  | -3.64467400 | -0.59498300 |
| H | -2.99113400 | 6.07042500  | -0.83674600 | C           | 2.38046800  | -1.60270200 | -0.58063600 |
| H | -5.22487800 | 4.97032300  | -0.84872100 | C           | 2.27183400  | -3.01393000 | -0.59488400 |
| H | -6.59009300 | 2.92974700  | -0.85397900 | C           | -2.37956100 | 1.60322600  | -0.58065800 |
| H | -6.75291800 | 0.44435900  | -0.84630300 | C           | -2.27181300 | 3.01369800  | -0.59710600 |
| C | -1.28842700 | -0.58378000 | 2.67310500  | C           | 0.19730500  | 2.86213600  | -0.58141800 |
| C | -0.13320500 | -1.41151600 | 2.64584100  | C           | -0.98152900 | 3.64405900  | -0.59747200 |
| C | 1.15136700  | -0.82019800 | 2.67595300  | C           | -1.47458000 | -3.47494700 | -0.59747800 |
| C | 1.29046100  | 0.59385900  | 2.64520900  | C           | -2.66567500 | -2.67274600 | -0.59755800 |
| C | 0.13637100  | 1.41131500  | 2.67253400  | C           | -2.57787500 | -1.26091300 | -0.58087100 |
| C | -1.15783900 | 0.82449000  | 2.64414700  | C           | -3.64649000 | 0.97220000  | -0.59518000 |
| H | -0.27308700 | -2.48433600 | 2.61319900  | C           | -3.74576200 | -0.46125800 | -0.59537900 |
| H | 2.29004100  | 1.00785900  | 2.61212100  | C           | 1.47375700  | 3.47368100  | -0.59669700 |
| H | -2.01723900 | 1.48171900  | 2.60918100  | C           | 2.66557500  | 2.67099300  | -0.59711400 |
| H | 6.91753600  | 2.03828700  | -0.84957000 | C           | 2.57858900  | 1.25829300  | -0.58205000 |
| H | 6.75341600  | -0.44601000 | -0.84340600 | C           | 3.64704600  | -0.97279600 | -0.59774000 |
| H | 6.59080800  | -2.93030600 | -0.85675600 | C           | 3.74626600  | 0.45979300  | -0.59855900 |
| H | 5.22652500  | -4.97147900 | -0.85693700 | C           | -5.02800500 | -1.09236200 | -0.61267500 |
| H | 2.99132600  | -6.07110000 | -0.84028100 | C           | -6.19838900 | -0.25434300 | -0.62398400 |

|   |             |             |             |              |             |             |             |
|---|-------------|-------------|-------------|--------------|-------------|-------------|-------------|
| C | -6.10423300 | 1.10533900  | -0.62350500 | C            | 0.80700800  | 1.18516500  | 2.74806100  |
| C | -3.45972900 | 3.80844800  | -0.61423700 | H            | -2.50659700 | 0.19059200  | 2.69607800  |
| C | -3.31923700 | 5.24119900  | -0.62714100 | H            | 1.09059100  | -2.26280300 | 2.69868900  |
| C | -4.70883000 | 3.17164300  | -0.61886000 | H            | 1.41684400  | 2.07928900  | 2.69307200  |
| C | -0.87833400 | 5.06955000  | -0.61513500 | H            | 2.01623200  | -6.92417100 | -0.63365600 |
| C | -2.09488200 | 5.83935200  | -0.62758400 | H            | -0.46776900 | -6.74975200 | -0.63211900 |
| C | -4.82955000 | 1.77405700  | -0.61183200 | H            | -2.95199500 | -6.58066800 | -0.64056300 |
| H | -7.00433600 | 1.71525500  | -0.63409400 | H            | -4.98852800 | -5.20895000 | -0.64089000 |
| H | -5.61129800 | 3.77925000  | -0.63077500 | H            | -6.07882200 | -2.97056600 | -0.63307300 |
| H | -4.22277500 | 5.84600200  | -0.63786900 | H            | -7.17397400 | -0.73435600 | -0.63492000 |
| H | -2.01665700 | 6.92380600  | -0.63866100 | F            | -1.19126000 | 2.47788300  | 2.70891600  |
| C | 0.87780300  | -5.07012100 | -0.61194600 | F            | -1.54789200 | -2.26722300 | 2.71494000  |
| C | 2.09431100  | -5.83968800 | -0.62302200 | F            | 2.73982300  | -0.20400400 | 2.71153300  |
| C | 5.02847900  | 1.09112200  | -0.61707500 |              |             |             |             |
| C | 6.19908500  | 0.25314700  | -0.63011800 | <b>17-CI</b> |             |             |             |
| C | 3.45956000  | -3.80882500 | -0.61164600 | C            | 1.27365200  | -0.64741200 | -0.67116000 |
| C | 3.31890600  | -5.24140200 | -0.62282400 | C            | 0.07600400  | -1.42698700 | -0.67114200 |
| C | 4.70931800  | -3.17174500 | -0.61938000 | C            | 1.19725200  | 0.78033900  | -0.67198100 |
| C | 4.83002100  | -1.77487900 | -0.61530700 | C            | -1.19880900 | -0.77933900 | -0.67074900 |
| C | 6.10492700  | -1.10626100 | -0.62922800 | C            | -0.07675200 | 1.42753700  | -0.67104400 |
| H | 4.22237900  | -5.84633000 | -0.63332100 | C            | -1.27515100 | 0.64752500  | -0.67042700 |
| H | 5.61150600  | -3.77976000 | -0.63149100 | Cr           | 0.00057000  | -0.00022800 | 1.08543900  |
| H | 7.00492300  | -1.71630200 | -0.64035900 | C            | -2.40460200 | -1.56367400 | -0.72240800 |
| H | 7.17459000  | 0.73327200  | -0.64190700 | C            | -2.31852700 | -2.97613800 | -0.75764300 |
| C | -3.95177300 | -3.29613900 | -0.61574000 | C            | 0.15304500  | -2.86331000 | -0.72269900 |
| C | -5.10118400 | -2.49323400 | -0.62055700 | C            | -1.03870200 | -3.62634000 | -0.75785400 |
| C | -4.01022000 | -4.73455500 | -0.62928400 | C            | -0.15313500 | 2.86395700  | -0.72260000 |
| C | -0.39287900 | -5.66438600 | -0.61982200 | C            | 1.03752300  | 3.62662800  | -0.77300100 |
| C | -1.56896700 | -4.90106200 | -0.61539300 | C            | 2.40266100  | 1.56516900  | -0.72369800 |
| C | -2.87999800 | -5.49579000 | -0.62909300 | C            | 2.31697300  | 2.97655400  | -0.77342000 |
| C | 0.39170900  | 5.66347500  | -0.62068700 | C            | -3.66059500 | -0.91392800 | -0.77151700 |
| C | 1.56836300  | 4.89970600  | -0.61394900 | C            | -3.73719000 | 0.51906900  | -0.77132700 |
| C | 2.87932100  | 5.49420500  | -0.62648700 | C            | -2.55768500 | 1.29894100  | -0.72192600 |
| C | 5.10154600  | 2.49127900  | -0.62266900 | C            | -1.41954900 | 3.49557000  | -0.75730600 |
| C | 3.95151200  | 3.29455800  | -0.61504400 | C            | -2.62260500 | 2.71257900  | -0.75686700 |
| C | 4.00977400  | 4.73282500  | -0.62706700 | C            | 3.65948200  | 0.91468900  | -0.75868800 |
| H | 6.07895900  | 2.96906400  | -0.63553200 | C            | 3.73612700  | -0.51868900 | -0.75828600 |
| H | 4.98803200  | 5.20735700  | -0.63859600 | C            | 2.55591100  | -1.29941300 | -0.72301200 |
| H | 2.95145900  | 6.57909100  | -0.63757800 | C            | 1.41833900  | -3.49471700 | -0.77224800 |
| H | 0.46709000  | 6.74880600  | -0.63301900 | C            | 2.62106400  | -2.71195100 | -0.77217600 |
| C | -0.60454000 | 1.25900600  | 2.74743400  | C            | -3.89805400 | 3.35603800  | -0.81078300 |
| C | -1.42727400 | 0.10970100  | 2.75003400  | C            | -3.93436800 | 4.79440800  | -0.84508300 |
| C | -0.78555100 | -1.14968900 | 2.75007000  | C            | -2.79230300 | 5.53777200  | -0.84550900 |
| C | 0.62112300  | -1.28752000 | 2.75160400  | C            | 0.95692500  | 5.05237100  | -0.82831700 |
| C | 1.39088800  | -0.10210700 | 2.74859900  | C            | 2.18432600  | 5.80290700  | -0.87259800 |

|   |             |             |             |              |             |             |             |
|---|-------------|-------------|-------------|--------------|-------------|-------------|-------------|
| C | -0.30349500 | 5.66620500  | -0.83996900 | H            | 2.51076400  | 0.11649200  | 2.65764200  |
| C | 3.51621200  | 3.75179700  | -0.82906000 | H            | -4.31385700 | -5.77540000 | -0.87867700 |
| C | 3.39907400  | 5.18564200  | -0.87291100 | H            | -5.66780400 | -3.68805300 | -0.87863400 |
| C | -1.49166000 | 4.92226400  | -0.81166200 | H            | -7.02732900 | -1.60524000 | -0.90573700 |
| H | -2.84652500 | 6.62321800  | -0.87799400 | H            | -7.15839400 | 0.84768400  | -0.90553400 |
| H | -0.36159000 | 6.75190100  | -0.88003900 | H            | -6.02861100 | 3.06361000  | -0.87789800 |
| H | 2.12236500  | 6.88779800  | -0.90901300 | H            | -4.90498000 | 5.28333900  | -0.87725600 |
| H | 4.31208700  | 5.77493000  | -0.90947600 | Cl           | -3.15964800 | -0.14916400 | 2.76774700  |
| C | -3.51804900 | -3.75187100 | -0.81186300 | Cl           | 1.45518700  | 2.81144800  | 2.76340500  |
| C | -3.40083200 | -5.18588600 | -0.84629700 | Cl           | 1.71145400  | -2.66534500 | 2.76162200  |
| C | 3.89620800  | -3.35496900 | -0.82695700 |              |             |             |             |
| C | 3.93256900  | -4.79318200 | -0.87024600 | <b>17-Br</b> |             |             |             |
| C | -0.95835200 | -5.05258500 | -0.81203600 | C            | -0.77737900 | 1.19943200  | -0.96115000 |
| C | -2.18593900 | -5.80317700 | -0.84638700 | C            | 0.64989400  | 1.27309200  | -0.96162400 |
| C | 0.30244400  | -5.66563400 | -0.83958700 | C            | -1.42741600 | -0.07369300 | -0.96202400 |
| C | 1.49014800  | -4.92094300 | -0.82730500 | C            | 1.42726100  | 0.07359900  | -0.96199000 |
| C | 2.79060800  | -5.53644900 | -0.87048000 | C            | -0.65020700 | -1.27284200 | -0.96165200 |
| H | -2.12411900 | -6.88820100 | -0.87890900 | C            | 0.77734800  | -1.19923000 | -0.96167700 |
| H | 0.36053000  | -6.75133700 | -0.87948600 | Cr           | 0.00009900  | -0.00005100 | 0.80308000  |
| H | 2.84464900  | -6.62179300 | -0.90651400 | C            | 2.86364100  | 0.14696200  | -1.02204600 |
| H | 4.90313900  | -5.28193700 | -0.90609400 | C            | 3.49789200  | 1.41180600  | -1.06130900 |
| C | -5.00834800 | 1.16992600  | -0.82611200 | C            | 1.30375000  | 2.55403000  | -1.02112100 |
| C | -5.05941800 | 2.57087000  | -0.83814200 | C            | 2.71740600  | 2.61616300  | -1.06035600 |
| C | -6.19157600 | 0.35159800  | -0.86955300 | C            | -1.30475600 | -2.55339200 | -1.02173400 |
| C | -4.75653600 | -3.09496100 | -0.83899400 | C            | -2.71706600 | -2.61543800 | -1.08028000 |
| C | -4.85505300 | -1.69655800 | -0.82659200 | C            | -2.86372500 | -0.14769200 | -1.02238400 |
| C | -6.11883500 | -1.00901000 | -0.86975400 | C            | -3.49738200 | -1.41132800 | -1.08142100 |
| C | 4.75509600  | 3.09568300  | -0.84099200 | C            | 3.62364200  | -1.04504600 | -1.08078900 |
| C | 4.85447500  | 1.69734600  | -0.81296500 | C            | 2.97103400  | -2.32285000 | -1.07965100 |
| C | 6.11838100  | 1.00967700  | -0.84671600 | C            | 1.55986500  | -2.40582700 | -1.02091200 |
| C | 5.05805500  | -2.57053400 | -0.83900200 | C            | -0.52645500 | -3.73504700 | -1.05877100 |
| C | 5.00784400  | -1.16954700 | -0.81191200 | C            | 0.90687700  | -3.66131700 | -1.05865500 |
| C | 6.19116700  | -0.35106900 | -0.84621200 | C            | -3.62445300 | 1.04543200  | -1.06057700 |
| H | 6.02725100  | -3.06328500 | -0.87856400 | C            | -2.97174900 | 2.32356500  | -1.05926900 |
| H | 7.15817500  | -0.84705800 | -0.87823800 | C            | -1.55917800 | 2.40661700  | -1.02001300 |
| H | 7.02705200  | 1.60585200  | -0.87903000 | C            | 0.52614400  | 3.73459700  | -1.07744100 |
| H | 5.66635400  | 3.68876900  | -0.88092700 | C            | -0.90683200 | 3.66085800  | -1.07725700 |
| C | 0.64675900  | 1.24690800  | 2.70520800  | C            | 1.68692800  | -4.85770200 | -1.11930500 |
| C | -0.76929100 | 1.20173800  | 2.70066800  | C            | 0.99697400  | -6.12018200 | -1.15556200 |
| C | -1.40062100 | -0.06654900 | 2.70711800  | C            | -0.36385900 | -6.19021400 | -1.15562000 |
| C | -0.65353600 | -1.27046000 | 2.69823100  | C            | -3.36248600 | -3.88886400 | -1.14371500 |
| C | 0.76057100  | -1.18302500 | 2.70513700  | C            | -4.80043300 | -3.92231400 | -1.19646400 |
| C | 1.42941000  | 0.06587200  | 2.69758900  | C            | -2.58057300 | -5.05230100 | -1.15414400 |
| H | -1.35390900 | 2.11294200  | 2.66312200  | C            | -4.92330500 | -1.48007500 | -1.14668000 |
| H | -1.15025200 | -2.23234500 | 2.65892500  | C            | -5.54136500 | -2.77884900 | -1.19798100 |

|   |             |             |             |                            |             |             |             |
|---|-------------|-------------|-------------|----------------------------|-------------|-------------|-------------|
| C | -1.17975500 | -5.00520900 | -1.11950400 | H                          | 6.88188000  | -2.13589400 | -1.23997600 |
| H | -0.86187400 | -7.15605500 | -1.19079900 | H                          | 5.76443100  | -4.32359000 | -1.23758200 |
| H | -3.07522600 | -6.02026000 | -1.19984300 | H                          | 3.67631800  | -5.67319500 | -1.19947200 |
| H | -5.29092600 | -4.89175600 | -1.23899200 | H                          | 1.59141700  | -7.02989500 | -1.19070600 |
| H | -6.62654900 | -2.83040200 | -1.24146100 | Br                         | 2.94588600  | -1.52994600 | 2.52096200  |
| C | 4.92439800  | 1.48095600  | -1.12528800 | Br                         | -2.79826300 | -1.78573700 | 2.52049000  |
| C | 5.54267800  | 2.77994800  | -1.16412000 | Br                         | -0.14687800 | 3.31531400  | 2.52039600  |
| C | -1.68692500 | 4.85655500  | -1.13988300 |                            |             |             |             |
| C | -0.99703300 | 6.11871700  | -1.18938200 |                            |             |             |             |
| C | 3.36339700  | 3.88992900  | -1.12252000 | <b>17-CO<sub>2</sub>Me</b> |             |             |             |
| C | 4.80166000  | 3.92348300  | -1.16277800 | C                          | 1.37957500  | -0.37388800 | -0.90102000 |
| C | 2.58039800  | 5.05248300  | -1.15441700 | C                          | 0.36431200  | -1.38169300 | -0.90008800 |
| C | 1.17948500  | 5.00402100  | -1.14051300 | C                          | 1.01498900  | 1.00698000  | -0.90026100 |
| C | 0.36368300  | 6.18872400  | -1.18964900 | C                          | -1.01401200 | -1.00715200 | -0.90214500 |
| H | 5.29239000  | 4.89301700  | -1.19980900 | C                          | -0.36543500 | 1.38217800  | -0.90165300 |
| H | 3.07492700  | 6.02047800  | -1.20067900 | C                          | -1.37910200 | 0.37589400  | -0.90071100 |
| H | 0.86176400  | 7.15429100  | -1.23127700 | Cr                         | -0.00083700 | 0.00021500  | 0.86859200  |
| H | -1.59150700 | 7.02816300  | -1.23077300 | C                          | -2.03402300 | -2.02024300 | -0.95791200 |
| C | 3.74358000  | -3.52343800 | -1.14316600 | C                          | -1.66344200 | -3.38503800 | -0.99787100 |
| C | 3.08517300  | -4.76094400 | -1.15383200 | C                          | 0.73148200  | -2.77169800 | -0.95734000 |
| C | 5.17731700  | -3.40942900 | -1.19558200 | C                          | -0.27950000 | -3.76126400 | -0.99796800 |
| C | 5.66568300  | 0.29141800  | -1.15963200 | C                          | -0.73287900 | 2.77194000  | -0.95790200 |
| C | 5.04909800  | -0.96741600 | -1.14610100 | C                          | 0.27813600  | 3.76114100  | -1.01277400 |
| C | 5.79711400  | -2.19601800 | -1.19704400 | C                          | 2.03525300  | 2.01997900  | -0.95836600 |
| C | -5.66581000 | -0.29114300 | -1.15966400 | C                          | 1.66297600  | 3.38491300  | -1.01351100 |
| C | -5.05053500 | 0.96815400  | -1.12453900 | C                          | -3.39617600 | -1.63933500 | -1.01221400 |
| C | -5.79883100 | 2.19692300  | -1.16249400 | C                          | -3.76269400 | -0.25198000 | -1.01258800 |
| C | -3.08539300 | 4.76114700  | -1.15322200 | C                          | -2.76656600 | 0.75289400  | -0.95828400 |
| C | -3.74495200 | 3.52437200  | -1.12109000 | C                          | -2.10024400 | 3.13349800  | -0.99744600 |
| C | -5.17901800 | 3.41042900  | -1.16081200 | C                          | -3.11813800 | 2.12309700  | -0.99768700 |
| H | -3.67644300 | 5.67345000  | -1.19907400 | C                          | 3.39771000  | 1.63933100  | -0.99842400 |
| H | -5.76640300 | 4.32464600  | -1.19702600 | C                          | 3.76374800  | 0.25270900  | -0.99699600 |
| H | -6.88379700 | 2.13694000  | -1.19986600 | C                          | 2.76693300  | -0.75061900 | -0.95688700 |
| H | -6.75134100 | -0.34712500 | -1.20664700 | C                          | 2.09979000  | -3.13191600 | -1.01134100 |
| C | -1.18395400 | -0.75620900 | 2.42243500  | C                          | 3.11806900  | -2.12068500 | -1.01032800 |
| C | 0.06347000  | -1.42671300 | 2.41461400  | C                          | -4.49778700 | 2.49365600  | -1.06081300 |
| C | 1.24633600  | -0.64805500 | 2.42255000  | C                          | -4.82611800 | 3.89415000  | -1.10007800 |
| C | 1.20344900  | 0.76754100  | 2.41397900  | C                          | -3.85877400 | 4.85380900  | -1.09970300 |
| C | -0.06248800 | 1.40250600  | 2.42282300  | C                          | -0.09131800 | 5.13992000  | -1.08014700 |
| C | -1.26682400 | 0.65759700  | 2.41537600  | C                          | 0.95698000  | 6.12409600  | -1.13849900 |
| H | 0.11194000  | -2.50776800 | 2.37868400  | C                          | -1.44984400 | 5.48474900  | -1.09535400 |
| H | 2.11581700  | 1.34968400  | 2.37701500  | C                          | 2.67967100  | 4.38763400  | -1.08356300 |
| H | -2.22715700 | 1.15676400  | 2.38060000  | C                          | 2.27288200  | 5.76713600  | -1.14134600 |
| H | 6.62804600  | 2.83167400  | -1.20205100 | C                          | -2.46087700 | 4.51523000  | -1.06021800 |
| H | 6.75121100  | 0.34731300  | -1.20669300 | H                          | -4.13202100 | 5.90552000  | -1.13577400 |
|   |             |             |             | H                          | -1.72738800 | 6.53560200  | -1.14244500 |

|   |             |             |             |              |             |             |             |
|---|-------------|-------------|-------------|--------------|-------------|-------------|-------------|
| H | 0.67504700  | 7.17310000  | -1.18666200 | H            | -5.87574700 | 4.17527700  | -1.13754400 |
| H | 3.04641500  | 6.52962800  | -1.19314300 | C            | 2.24384600  | -1.85317700 | 2.49996000  |
| C | -2.67980800 | -4.38830100 | -1.06080300 | C            | 0.48173300  | 2.86801800  | 2.50488200  |
| C | -2.27405900 | -5.76812900 | -1.10157700 | C            | -2.72511800 | -1.01822500 | 2.50071400  |
| C | 4.49694700  | -2.49018100 | -1.07718500 | O            | 3.40627900  | -1.49863500 | 2.43359700  |
| C | 4.82508300  | -3.89006700 | -1.13546000 | O            | 1.78944800  | 3.19423400  | 2.62396800  |
| C | 0.08939300  | -5.14125900 | -1.06229800 | O            | -2.99864800 | -2.20221400 | 2.43201600  |
| C | -0.95929600 | -6.12595800 | -1.10237500 | O            | 1.87187400  | -3.14883000 | 2.61877800  |
| C | 1.44792800  | -5.48468200 | -1.09674500 | O            | -0.40759700 | 3.69660400  | 2.44249100  |
| C | 2.45977700  | -4.51362100 | -1.08141100 | O            | -3.66130100 | -0.04861800 | 2.62244900  |
| C | 3.85793200  | -4.85116200 | -1.13866100 | C            | 2.95041400  | -4.09235300 | 2.69015500  |
| H | -0.67799700 | -7.17553000 | -1.14041700 | H            | 2.47511700  | -5.06899000 | 2.78769600  |
| H | 1.72559800  | -6.53546100 | -1.14867700 | H            | 3.56207300  | -4.05199500 | 1.78607800  |
| H | 4.13166600  | -5.90228900 | -1.19026600 | H            | 3.58169400  | -3.88384600 | 3.55870800  |
| H | 5.87453900  | -4.17030300 | -1.18343600 | C            | -5.01809700 | -0.50976700 | 2.69261300  |
| C | -5.13946700 | 0.12713600  | -1.08173100 | H            | -5.62511300 | 0.39070100  | 2.79209900  |
| C | -5.47456300 | 1.48888500  | -1.09556400 | H            | -5.28973000 | -1.05707700 | 1.78724800  |
| C | -6.13085400 | -0.91490900 | -1.13911900 | H            | -5.15399300 | -1.16250500 | 3.55972700  |
| C | -4.02494300 | -3.99758100 | -1.09535100 | C            | 2.06729700  | 4.60002000  | 2.69591100  |
| C | -4.40556400 | -2.64864400 | -1.07904800 | H            | 1.57045400  | 5.04223900  | 3.56428000  |
| C | -5.78202700 | -2.23298200 | -1.13690800 | H            | 3.15065300  | 4.67662100  | 2.79425600  |
| C | 4.02655100  | 3.99699100  | -1.09829600 | H            | 1.72720900  | 5.10964200  | 1.79164700  |
| C | 4.40840800  | 2.64877400  | -1.06267600 |              |             |             |             |
| C | 5.78549600  | 2.23298100  | -1.10200500 | <b>17-CN</b> |             |             |             |
| C | 5.47493800  | -1.48611600 | -1.09296200 | C            | -0.38833200 | 1.37469800  | -0.62848400 |
| C | 5.14081000  | -0.12580800 | -1.05916100 | C            | 0.99770300  | 1.02292600  | -0.62806700 |
| C | 6.13297000  | 0.91546500  | -1.10004900 | C            | -1.38449100 | 0.35178400  | -0.62811700 |
| H | 6.52375500  | -1.77121200 | -1.14010200 | C            | 1.38549300  | -0.35128100 | -0.62703400 |
| H | 7.18035400  | 0.62610800  | -1.13615400 | C            | -0.99617600 | -1.02446500 | -0.62771400 |
| H | 6.55381900  | 3.00130200  | -1.14065600 | C            | 0.38780400  | -1.37576900 | -0.62720500 |
| H | 4.79780900  | 4.76271200  | -1.15066900 | Cr           | -0.00027600 | 0.00045000  | 1.18003600  |
| C | 0.26588900  | 1.39719400  | 2.50794300  | C            | 2.77897600  | -0.70584800 | -0.66427600 |
| C | -1.07633200 | 0.92587200  | 2.48286800  | C            | 3.75909800  | 0.31567100  | -0.69012800 |
| C | -1.34360500 | -0.46994800 | 2.50677800  | C            | 2.00025600  | 2.05364300  | -0.66624900 |
| C | -0.26374900 | -1.39660300 | 2.48035300  | C            | 3.36980400  | 1.69516800  | -0.69159100 |
| C | 1.07855200  | -0.93027800 | 2.50546500  | C            | -1.99998100 | -2.05395000 | -0.66599300 |
| C | 1.34124000  | 0.46811100  | 2.48048100  | C            | -3.36874200 | -1.69567500 | -0.70267200 |
| H | -1.88465400 | 1.64338400  | 2.43981400  | C            | -2.77839800 | 0.70460900  | -0.66570400 |
| H | -0.48052200 | -2.45553300 | 2.43590100  | C            | -3.75796100 | -0.31633800 | -0.70198600 |
| H | 2.36639600  | 0.81054200  | 2.43552100  | C            | 3.15310200  | -2.07037500 | -0.69859000 |
| H | -3.04834500 | -6.53047800 | -1.13813100 | C            | 2.15313000  | -3.09718900 | -0.69867800 |
| H | -4.79631500 | -4.76322600 | -1.14314300 | C            | 0.77913100  | -2.75931500 | -0.66441700 |
| H | -6.54951100 | -3.00162700 | -1.18512300 | C            | -1.60541300 | -3.41348000 | -0.69151000 |
| H | -7.17801600 | -0.62632200 | -1.19020300 | C            | -0.21604600 | -3.76615500 | -0.69024100 |
| H | -6.52341400 | 1.77380800  | -1.14683100 | C            | -3.15275700 | 2.06987600  | -0.68986800 |

|   |             |             |             |             |             |             |             |
|---|-------------|-------------|-------------|-------------|-------------|-------------|-------------|
| C | -2.15267400 | 3.09681300  | -0.68999200 | H           | -6.55252000 | 1.66155800  | -0.77306300 |
| C | -0.77793000 | 2.75873000  | -0.66616900 | C           | -1.37529900 | -0.38215600 | 2.78789700  |
| C | 1.60591200  | 3.41238600  | -0.70306300 | C           | -0.35648600 | -1.38191200 | 2.75565600  |
| C | 0.21670300  | 3.76498900  | -0.70237900 | C           | 1.01781500  | -0.99654900 | 2.78976900  |
| C | 0.17655800  | -5.14029500 | -0.72816800 | C           | 1.37428800  | 0.38548600  | 2.75601300  |
| C | -0.85562600 | -6.14271300 | -0.75313900 | C           | 0.35342600  | 1.38308700  | 2.78781700  |
| C | -2.17662400 | -5.80740600 | -0.75474500 | C           | -1.02168900 | 1.00065500  | 2.75335600  |
| C | -4.36231600 | -2.72161700 | -0.74262600 | H           | -0.62556900 | -2.43024700 | 2.70138900  |
| C | -5.74606700 | -2.32976900 | -0.77342500 | H           | 2.41676300  | 0.67658800  | 2.70220400  |
| C | -3.95785500 | -4.06397300 | -0.75213800 | H           | -1.79491400 | 1.75782300  | 2.69713900  |
| C | -5.14135000 | 0.03882100  | -0.74041500 | H           | 7.17048500  | 0.74690900  | -0.77398900 |
| C | -6.11607500 | -1.01861700 | -0.77217700 | H           | 6.55268800  | -1.66445800 | -0.77118000 |
| C | -2.60580200 | -4.43406800 | -0.73117200 | H           | 5.94530600  | -4.07559700 | -0.78546800 |
| H | -2.93765200 | -6.58335600 | -0.77728900 | H           | 4.23173300  | -5.83521300 | -0.78572100 |
| H | -4.71699400 | -4.84265700 | -0.77902100 | H           | 1.83747500  | -6.50624000 | -0.77167800 |
| H | -6.50131000 | -3.11119200 | -0.79604100 | H           | -0.55673400 | -7.18770600 | -0.77442900 |
| H | -7.16843000 | -0.74734300 | -0.79377100 | C           | -2.75337900 | -0.76694200 | 2.78231300  |
| C | 5.14321000  | -0.04040200 | -0.72788900 | C           | 0.70898700  | 2.76900200  | 2.78241100  |
| C | 6.11793700  | 1.01797100  | -0.75285300 | C           | 2.04004300  | -1.99772100 | 2.78402400  |
| C | -0.17496500 | 5.13845200  | -0.74064500 | N           | -3.87417000 | -1.07995800 | 2.81109700  |
| C | 0.85629400  | 6.14083900  | -0.77234100 | N           | 2.87143000  | -2.81198200 | 2.81156700  |
| C | 4.36353400  | 2.72223500  | -0.73125400 | N           | 0.99774400  | 3.89628800  | 2.81120600  |
| C | 5.74778500  | 2.32961800  | -0.75463700 |             |             |             |             |
| C | 3.95778500  | 4.06399500  | -0.75234400 | <b>18-a</b> |             |             |             |
| C | 2.60518000  | 4.43278200  | -0.74291000 | C           | -6.85117600 | 0.71755600  | -0.40674900 |
| C | 2.17679200  | 5.80563900  | -0.77363500 | C           | -5.62069700 | 1.42925500  | -0.34137800 |
| H | 6.50329500  | 3.11095400  | -0.77715600 | C           | -6.85075700 | -0.72025100 | -0.39350700 |
| H | 4.71611900  | 4.84346400  | -0.77914300 | C           | -4.37673600 | 0.71425100  | -0.31527600 |
| H | 2.93791700  | 6.58132500  | -0.79616200 | C           | -5.62008600 | -1.43294800 | -0.34743400 |
| H | 0.55720800  | 7.18564500  | -0.79384000 | C           | -4.37781100 | -0.71641700 | -0.30148500 |
| C | 2.53720600  | -4.47278500 | -0.73645000 | Cr          | -5.70873200 | 0.00529300  | 1.53815100  |
| C | 1.54150300  | -5.45975300 | -0.74631500 | C           | -3.14336300 | 1.42880000  | -0.28155000 |
| C | 3.94040600  | -4.78820100 | -0.76516200 | C           | -3.15206100 | 2.85959300  | -0.30284200 |
| C | 5.49871200  | -1.39638800 | -0.74589700 | C           | -5.61961100 | 2.86861700  | -0.37510700 |
| C | 4.53845100  | -2.41788300 | -0.73617100 | C           | -4.39082100 | 3.56795400  | -0.34518000 |
| C | 4.89091700  | -3.81219600 | -0.76498800 | C           | -5.61926500 | -2.87159600 | -0.36466000 |
| C | -5.49826600 | 1.39459700  | -0.74774900 | C           | -6.85138900 | -3.56885900 | -0.43262000 |
| C | -4.53916100 | 2.41691500  | -0.72704300 | C           | -8.09027700 | -1.43651100 | -0.47357400 |
| C | -4.89119100 | 3.81205000  | -0.74888000 | C           | -8.08107300 | -2.85526900 | -0.48473600 |
| C | -1.53975100 | 5.45934000  | -0.74785300 | C           | -1.92268300 | 0.71632700  | -0.25910900 |
| C | -2.53631600 | 4.47349500  | -0.72714100 | C           | -1.92297200 | -0.71829000 | -0.25445300 |
| C | -3.94033000 | 4.78843500  | -0.74888600 | C           | -3.14302000 | -1.43105700 | -0.28303400 |
| H | -1.83462200 | 6.50614200  | -0.77307100 | C           | -4.39002400 | -3.57082900 | -0.33875600 |
| H | -4.23195300 | 5.83550100  | -0.76907200 | C           | -3.15171900 | -2.86168800 | -0.29490200 |
| H | -5.94564300 | 4.07572500  | -0.76909500 | C           | -9.31041800 | -0.71833700 | -0.54411400 |



|   |              |             |             |   |              |             |             |
|---|--------------|-------------|-------------|---|--------------|-------------|-------------|
| C | -9.31081000  | 0.71480200  | -0.54665100 | H | -11.46133600 | -3.38500500 | -0.67161200 |
| C | -8.09068500  | 1.43328400  | -0.47366500 | C | -5.10432200  | 1.34875600  | 2.63126100  |
| C | -6.85190300  | 3.56549700  | -0.43949900 | C | -4.94258200  | -1.24338100 | 2.64351600  |
| C | -8.08164700  | 2.85221100  | -0.49201000 | C | -7.24907600  | -0.08424700 | 2.52387800  |
| C | -1.92706700  | -3.56804500 | -0.27117200 | O | -4.45063700  | -2.04529400 | 3.32811400  |
| C | -1.92755400  | -5.01400200 | -0.28262100 | O | -4.71725600  | 2.21188800  | 3.30889500  |
| C | -3.16604500  | -5.69253500 | -0.32616800 | O | -8.23978800  | -0.14121200 | 3.13232200  |
| C | -6.84666500  | -5.01052200 | -0.45107900 | C | 0.53483500   | 3.56558700  | -0.20973000 |
| C | -8.11933200  | -5.69115000 | -0.51582600 | C | 1.76359700   | 2.85808300  | -0.17488400 |
| C | -5.64021600  | -5.69006100 | -0.40997100 | C | 0.53472700   | 5.01242900  | -0.21624500 |
| C | -9.32840700  | -3.56402800 | -0.55759800 | C | -0.69890600  | 5.69196100  | -0.25731300 |
| C | -9.29188600  | -5.00715600 | -0.56655000 | C | 1.76387200   | 1.42582900  | -0.17248500 |
| C | -4.38919800  | -5.01212600 | -0.35715400 | C | 1.76420500   | -1.42677000 | -0.17255600 |
| H | -3.16629500  | -6.77998300 | -0.33698200 | C | 2.99401200   | -0.71545200 | -0.14164700 |
| H | -5.64034100  | -6.77765700 | -0.42179700 | C | 1.76423100   | -2.85901400 | -0.17540900 |
| H | -8.11733600  | -6.77819800 | -0.52463000 | C | 2.99384700   | 0.71481800  | -0.14075100 |
| H | -10.23683100 | -5.54245800 | -0.61596300 | C | 0.53570600   | -3.56682400 | -0.20848000 |
| C | -1.92782300  | 3.56614100  | -0.27560400 | C | -0.69765700  | -5.69350700 | -0.25263000 |
| C | -1.92848900  | 5.01207500  | -0.28887800 | C | 0.53586000   | -5.01359100 | -0.21466400 |
| C | -9.32917000  | 3.56053300  | -0.56365500 | H | -0.69884100  | 6.77940400  | -0.26357400 |
| C | -9.29275600  | 5.00367800  | -0.57494000 | H | -0.69727000  | -6.78096600 | -0.25844900 |
| C | -4.39006600  | 5.00931300  | -0.36709700 | C | 2.99638200   | 3.56563200  | -0.14391600 |
| C | -3.16716500  | 5.69000900  | -0.33603400 | C | 4.22285600   | 2.85784700  | -0.11031600 |
| C | -5.64111500  | 5.68686400  | -0.42211300 | C | 2.99718900   | 5.01059800  | -0.14640900 |
| C | -6.84745700  | 5.00730000  | -0.46157300 | C | 4.22250000   | 1.42453100  | -0.11007100 |
| C | -8.12015900  | 5.68776800  | -0.52703500 | C | 1.76810100   | 5.69145300  | -0.18333200 |
| H | -3.16783700  | 6.77744600  | -0.34757900 | C | 4.22286700   | -1.42486300 | -0.11086700 |
| H | -5.64139000  | 6.77445200  | -0.43492700 | C | 5.45112300   | -0.71410100 | -0.07946400 |
| H | -8.11815800  | 6.77479600  | -0.53727700 | C | 4.22358600   | -2.85818100 | -0.11308600 |
| H | -10.23772400 | 5.53887700  | -0.62490200 | C | 2.99730500   | -3.56625000 | -0.14567300 |
| C | -0.69152800  | -1.42867800 | -0.23160600 | C | 5.45093100   | 0.71405500  | -0.07813200 |
| C | -0.69341000  | -2.85956500 | -0.23572000 | C | 1.76947100   | -5.69235400 | -0.18396900 |
| C | 0.53575400   | -0.71711000 | -0.20126200 | C | 2.99845600   | -5.01118000 | -0.14901700 |
| C | -0.69390800  | 2.85800200  | -0.23879800 | H | 1.76880800   | 6.77894700  | -0.18625400 |
| C | -0.69183500  | 1.42705600  | -0.23136900 | H | 1.77043400   | -6.77986000 | -0.18706900 |
| C | 0.53570100   | 0.71586500  | -0.20193100 | C | 5.45649900   | 3.56472600  | -0.07831000 |
| C | -10.51835000 | -2.84505900 | -0.61902900 | C | 6.68352500   | 2.85572000  | -0.04593700 |
| C | -10.54368500 | -1.43349000 | -0.61657900 | C | 5.45702300   | 5.00721400  | -0.07868800 |
| C | -11.76054100 | -0.68700100 | -0.68506300 | C | 6.68293700   | 1.42434200  | -0.04666100 |
| C | -10.51914500 | 2.84136200  | -0.62254200 | C | 4.23692300   | 5.68903600  | -0.11277600 |
| C | -10.54409000 | 1.42964000  | -0.61836300 | C | 6.68333300   | -1.42409600 | -0.04838000 |
| C | -11.76083400 | 0.68278300  | -0.68543100 | C | 7.90963500   | -0.71408400 | -0.01681000 |
| H | -11.46222200 | 3.38103100  | -0.67595900 | C | 6.68432900   | -2.85548000 | -0.05012100 |
| H | -12.70019200 | 1.22742200  | -0.73776200 | C | 7.90943200   | 0.71462000  | -0.01544500 |
| H | -12.69974100 | -1.23202100 | -0.73640500 | C | 5.45747700   | -3.56478000 | -0.08237300 |

|             |             |             |             |    |             |             |             |
|-------------|-------------|-------------|-------------|----|-------------|-------------|-------------|
| C           | 4.23840300  | -5.68938500 | -0.11770200 | C  | 4.31786500  | 0.71649100  | -0.44018900 |
| C           | 5.45839400  | -5.00726700 | -0.08446900 | Cr | 5.79406200  | 0.01600900  | 1.33494800  |
| H           | 4.23816400  | 6.77661300  | -0.11350300 | C  | 3.09582100  | -1.43598200 | -0.35245800 |
| H           | 4.23989700  | -6.77697300 | -0.11930200 | C  | 3.09416600  | -2.86463300 | -0.38865700 |
| C           | 7.91848400  | 3.56165300  | -0.01362600 | C  | 5.55575400  | -2.87259200 | -0.55697500 |
| C           | 9.14218600  | 2.85132500  | 0.01756300  | C  | 4.32641800  | -3.57321500 | -0.48012700 |
| C           | 7.91380200  | 5.00508500  | -0.01291800 | C  | 5.55657400  | 2.86799600  | -0.57324400 |
| C           | 6.70911100  | 5.68546600  | -0.04481100 | C  | 6.78288500  | 3.56423000  | -0.70746500 |
| C           | 9.14284100  | 1.42647800  | 0.01638000  | C  | 8.01749500  | 1.43151200  | -0.81684000 |
| C           | 9.14326100  | -1.42565700 | 0.01391500  | C  | 8.00763000  | 2.85089400  | -0.83201600 |
| C           | 10.37363300 | -0.71270400 | 0.04565200  | C  | 1.87228000  | -0.71940700 | -0.30613200 |
| C           | 9.14302800  | -2.85050200 | 0.01247500  | C  | 1.86921600  | 0.71696800  | -0.28930800 |
| C           | 10.37342600 | 0.71382700  | 0.04703700  | C  | 3.09702500  | 1.43365400  | -0.35447700 |
| C           | 7.91951500  | -3.56113300 | -0.01931300 | C  | 4.32937600  | 3.56865500  | -0.48796600 |
| C           | 6.71070200  | -5.68525200 | -0.05279600 | C  | 3.09502900  | 2.86228300  | -0.39196700 |
| C           | 7.91524500  | -5.00456800 | -0.02090700 | C  | 9.23163600  | 0.71252700  | -0.96271000 |
| H           | 6.70995100  | 6.77323800  | -0.04427900 | C  | 9.23030000  | -0.72023300 | -0.95833100 |
| H           | 6.71182300  | -6.77303200 | -0.05374600 | C  | 8.01636300  | -1.43816900 | -0.81474900 |
| C           | 10.39352400 | 3.55985900  | 0.05037000  | C  | 6.78089300  | -3.57055900 | -0.69461100 |
| C           | 11.58393300 | 2.84286900  | 0.08004100  | C  | 8.00599800  | -2.85656100 | -0.81818100 |
| C           | 10.35946400 | 5.00258600  | 0.05113300  | C  | 1.86659600  | 3.57194900  | -0.34712000 |
| C           | 9.18648900  | 5.68690700  | 0.02124000  | C  | 1.86662100  | 5.01656600  | -0.38073000 |
| C           | 11.60854600 | 1.43007900  | 0.07910300  | C  | 3.10661000  | 5.69209200  | -0.46022700 |
| C           | 11.60897800 | -1.42866300 | 0.07623000  | C  | 6.77730200  | 5.00693100  | -0.73227100 |
| C           | 12.82624300 | -0.68488600 | 0.10786000  | C  | 8.04515000  | 5.68676300  | -0.86558800 |
| C           | 11.58478100 | -2.84145200 | 0.07436700  | C  | 5.57520900  | 5.68707200  | -0.63568500 |
| C           | 12.82603300 | 0.68659900  | 0.10926700  | C  | 9.24936200  | 3.55876100  | -0.97374700 |
| C           | 10.39458000 | -3.55873500 | 0.04359500  | C  | 9.21276800  | 5.00219500  | -0.97917700 |
| C           | 9.18815500  | -5.68608600 | 0.01118200  | C  | 4.32661500  | 5.01080000  | -0.52355100 |
| C           | 10.36094500 | -5.00146900 | 0.04165500  | H  | 3.10775400  | 6.77924400  | -0.48422100 |
| H           | 9.18415600  | 6.77408800  | 0.02253400  | H  | 5.57532300  | 6.77452100  | -0.65297300 |
| H           | 11.30602100 | 5.53695800  | 0.07676100  | H  | 8.04323000  | 6.77373400  | -0.87400500 |
| H           | 12.52826000 | 3.38270700  | 0.10510900  | H  | 10.15371300 | 5.53717000  | -1.08029100 |
| H           | 13.76632200 | 1.23186600  | 0.13400700  | C  | 1.86318700  | -3.57234000 | -0.34765700 |
| H           | 13.76669400 | -1.22992000 | 0.13144300  | C  | 1.86308700  | -5.01707700 | -0.38232300 |
| H           | 12.52927400 | -3.38105900 | 0.09812400  | C  | 9.24683600  | -3.56588900 | -0.96192700 |
| H           | 11.30767400 | -5.53561100 | 0.06573400  | C  | 9.20988700  | -5.00921900 | -0.96281600 |
| H           | 9.18613300  | -6.77327300 | 0.01052800  | C  | 4.32343400  | -5.01541700 | -0.51238600 |
|             |             |             |             | C  | 3.10210200  | -5.69491800 | -0.45494700 |
|             |             |             |             | C  | 5.57188200  | -5.69310300 | -0.61864200 |
|             |             |             |             | C  | 6.77444200  | -5.01284800 | -0.71425000 |
|             |             |             |             | C  | 8.04228300  | -5.69324300 | -0.84520400 |
|             |             |             |             | H  | 3.10126000  | -6.78203800 | -0.47821500 |
|             |             |             |             | H  | 5.57144000  | -6.78049600 | -0.63532400 |
|             |             |             |             | H  | 8.04027000  | -6.78024300 | -0.85108200 |
| <b>18-c</b> |             |             |             |    |             |             |             |
| C           | 6.78473200  | -0.72058400 | -0.65525500 |    |             |             |             |
| C           | 5.55879300  | -1.43562200 | -0.53904900 |    |             |             |             |
| C           | 6.78535700  | 0.71645900  | -0.68177300 |    |             |             |             |
| C           | 4.32264500  | -0.71855300 | -0.42279900 |    |             |             |             |
| C           | 5.56196500  | 1.42854000  | -0.52866700 |    |             |             |             |

|   |             |             |             |   |              |             |             |
|---|-------------|-------------|-------------|---|--------------|-------------|-------------|
| H | 10.15072300 | -5.54466100 | -1.06258400 | C | -3.06293200  | 3.56926400  | -0.27578300 |
| C | 0.62965900  | 1.43479800  | -0.26840700 | C | -5.52082400  | -0.71237600 | -0.26919500 |
| C | 0.63115500  | 2.87273400  | -0.28717700 | C | -1.83338400  | 5.69568000  | -0.29825600 |
| C | -0.60327500 | 0.71926800  | -0.24958100 | C | -3.06252200  | 5.01490600  | -0.28107600 |
| C | 0.62914800  | -2.87302600 | -0.29724600 | H | -1.83961200  | -6.78113100 | -0.32168800 |
| C | 0.62812400  | -1.43218800 | -0.25347800 | H | -1.83499900  | 6.78305300  | -0.30777300 |
| C | -0.60686800 | -0.71995000 | -0.27579900 | C | -5.52730600  | -3.56361100 | -0.27158300 |
| C | 10.43353900 | 2.83959400  | -1.10364200 | C | -6.75338800  | -2.85358000 | -0.26374100 |
| C | 10.45833200 | 1.42722200  | -1.10409600 | C | -5.52811400  | -5.00645700 | -0.27435600 |
| C | 11.66883300 | 0.68006100  | -1.24211400 | C | -6.75202900  | -1.42178100 | -0.26293400 |
| C | 10.43105800 | -2.84763700 | -1.09653500 | C | -4.30799800  | -5.68952700 | -0.28583100 |
| C | 10.45706100 | -1.43591900 | -1.10095900 | C | -6.75087900  | 1.42699000  | -0.26077000 |
| C | 11.66785800 | -0.68992800 | -1.24149000 | C | -7.97846800  | 0.71715000  | -0.25379700 |
| H | 11.36925500 | -3.38819700 | -1.20162300 | C | -6.75094400  | 2.85870100  | -0.25920300 |
| H | 12.60242400 | -1.23516400 | -1.34647600 | C | -7.97914700  | -0.71093600 | -0.25458700 |
| H | 12.60390200 | 1.22408700  | -1.34864600 | C | -5.52458900  | 3.56779100  | -0.26533700 |
| H | 11.37209300 | 3.37910000  | -1.21043600 | C | -4.30325300  | 5.69242000  | -0.27389600 |
| C | 4.93984100  | -1.08650000 | 2.53654200  | C | -5.52417300  | 5.01029100  | -0.26484700 |
| C | 5.55295100  | 1.46068700  | 2.44868000  | H | -4.31061000  | -6.77700900 | -0.28922100 |
| C | 7.37204700  | -0.32257300 | 2.19598600  | H | -4.30509200  | 6.77991900  | -0.27513900 |
| O | 5.44060300  | 2.39216900  | 3.13286400  | C | -7.98957800  | -3.55876400 | -0.25677100 |
| O | 4.41095700  | -1.79928100 | 3.28575000  | C | -9.21285100  | -2.84756200 | -0.24777800 |
| O | 8.38439900  | -0.53915600 | 2.72802500  | C | -7.98575700  | -5.00202700 | -0.25774500 |
| C | -0.59893700 | -3.57067400 | -0.29458800 | C | -6.78089300  | -5.68354800 | -0.26708300 |
| C | -1.83480400 | -2.86096000 | -0.28305200 | C | -9.21280300  | -1.42231400 | -0.24699900 |
| C | -0.60105700 | -5.01712200 | -0.31844400 | C | -9.21167700  | 1.42950300  | -0.24431800 |
| C | 0.63231000  | -5.69592100 | -0.35594000 | C | -10.44255700 | 0.71725000  | -0.23622900 |
| C | -1.84235400 | -1.43329800 | -0.26771500 | C | -9.21057000  | 2.85471200  | -0.24287100 |
| C | -1.84122600 | 1.43520800  | -0.27079400 | C | -10.44317200 | -0.70906000 | -0.23740400 |
| C | -3.06130700 | 0.71970400  | -0.27198500 | C | -7.98678400  | 3.56496500  | -0.25043400 |
| C | -1.83208600 | 2.86182900  | -0.27313800 | C | -6.77617600  | 5.68853500  | -0.25615500 |
| C | -3.06309300 | -0.71692000 | -0.27797200 | C | -7.98176500  | 5.00802900  | -0.24850200 |
| C | -0.59635100 | 3.57231100  | -0.28828100 | H | -6.78276900  | -6.77125100 | -0.26764900 |
| C | 0.63693700  | 5.69741700  | -0.34870900 | H | -6.77710700  | 6.77623700  | -0.25435300 |
| C | -0.59691500 | 5.01856700  | -0.30887200 | C | -10.46491300 | -3.55532100 | -0.23924200 |
| H | 0.63196300  | -6.78312400 | -0.37285900 | C | -11.65531700 | -2.83742300 | -0.22999000 |
| H | 0.63741500  | 6.78455200  | -0.36672400 | C | -10.43199000 | -4.99790000 | -0.24014700 |
| C | -3.06574100 | -3.56710500 | -0.28224800 | C | -9.25908000  | -5.68312000 | -0.24901000 |
| C | -4.29288500 | -2.85726300 | -0.27618400 | C | -11.67914900 | -1.42476200 | -0.22873700 |
| C | -3.06657600 | -5.01288500 | -0.29141300 | C | -11.67804200 | 1.43396400  | -0.22604000 |
| C | -4.29263700 | -1.42506900 | -0.27324100 | C | -12.89600000 | 0.69085300  | -0.21735600 |
| C | -1.83792700 | -5.69378400 | -0.31096600 | C | -11.65310100 | 2.84655800  | -0.22459800 |
| C | -4.29147500 | 1.42859600  | -0.27342000 | C | -12.89652900 | -0.68072200 | -0.21867300 |
| C | -5.51991600 | 0.71666500  | -0.26783300 | C | -10.46209500 | 3.56352000  | -0.23261000 |
| C | -4.29026400 | 2.86034500  | -0.27039400 | C | -9.25443300  | 5.69024700  | -0.23818700 |

|    |              |             |             |
|----|--------------|-------------|-------------|
| C  | -10.42795600 | 5.00600800  | -0.23061800 |
| H  | -9.25752800  | -6.77025000 | -0.24892400 |
| H  | -11.37916300 | -5.53165600 | -0.23292700 |
| H  | -12.60020300 | -3.37674300 | -0.22286600 |
| H  | -13.83740500 | -1.22540600 | -0.21144400 |
| H  | -13.83644800 | 1.23626000  | -0.20906700 |
| H  | -12.59755000 | 3.38662300  | -0.21623500 |
| H  | -11.37466900 | 5.54055800  | -0.22211700 |
| H  | -9.25194000  | 6.77736900  | -0.23579500 |
| Cr | 0.60142100   | -0.02132500 | 1.62361200  |
| C  | 1.60444400   | 1.06407800  | 2.72207700  |
| C  | -0.86174700  | 0.34681300  | 2.65821900  |
| C  | 0.94362200   | -1.46963300 | 2.70489000  |
| O  | -1.80351400  | 0.58259300  | 3.30017300  |
| O  | 2.22116800   | 1.76785900  | 3.40968300  |
| O  | 1.12353000   | -2.40181200 | 3.37355800  |

**18-d**

|    |             |             |             |
|----|-------------|-------------|-------------|
| C  | -6.98537100 | 0.71821500  | -0.57940600 |
| C  | -5.75490900 | 1.43019200  | -0.50861100 |
| C  | -6.98519100 | -0.71927000 | -0.57081800 |
| C  | -4.51234600 | 0.71476000  | -0.47628800 |
| C  | -5.75455300 | -1.43251600 | -0.51933800 |
| C  | -4.51331100 | -0.71627500 | -0.46646200 |
| Cr | -5.85112400 | -0.00000100 | 1.35963200  |
| C  | -3.27891400 | 1.43101100  | -0.43737600 |
| C  | -3.28651000 | 2.86043200  | -0.46022000 |
| C  | -5.75357000 | 2.87009200  | -0.53954000 |
| C  | -4.52590700 | 3.56961200  | -0.50639600 |
| C  | -5.75367400 | -2.87179900 | -0.54013600 |
| C  | -6.98619300 | -3.56875600 | -0.61417200 |
| C  | -8.22435000 | -1.43558400 | -0.65625700 |
| C  | -8.21529800 | -2.85455900 | -0.66996700 |
| C  | -2.05807100 | 0.71936200  | -0.41028700 |
| C  | -2.05808600 | -0.72153900 | -0.40383200 |
| C  | -3.27884300 | -1.43295900 | -0.44247000 |
| C  | -4.52604100 | -3.57154800 | -0.50955000 |
| C  | -3.28666600 | -2.86203700 | -0.45769900 |
| C  | -9.44371700 | -0.71719500 | -0.72957500 |
| C  | -9.44397700 | 0.71624100  | -0.72867700 |
| C  | -8.22452200 | 1.43450800  | -0.65030200 |
| C  | -6.98607300 | 3.56724600  | -0.60727800 |
| C  | -8.21542200 | 2.85371500  | -0.66474800 |
| C  | -2.06244100 | -3.57014200 | -0.43126100 |
| C  | -2.06200500 | -5.01665300 | -0.45038200 |

|   |              |             |             |
|---|--------------|-------------|-------------|
| C | -3.30094400  | -5.69373100 | -0.49957600 |
| C | -6.98154400  | -5.00987700 | -0.63490600 |
| C | -8.25384300  | -5.69027900 | -0.70506600 |
| C | -5.77492300  | -5.69010400 | -0.59072300 |
| C | -9.46235600  | -3.56290100 | -0.74783200 |
| C | -9.42612500  | -5.00580300 | -0.75872200 |
| C | -4.52456600  | -5.01255600 | -0.53183900 |
| H | -3.30208100  | -6.78103100 | -0.51413000 |
| H | -5.77543400  | -6.77758700 | -0.60429700 |
| H | -8.25213800  | -6.77725000 | -0.71505700 |
| H | -10.37093800 | -5.54090700 | -0.81178600 |
| C | -2.06209100  | 3.56829200  | -0.43272600 |
| C | -2.06144800  | 5.01485500  | -0.45359700 |
| C | -9.46262400  | 3.56213600  | -0.73833700 |
| C | -9.42631000  | 5.00511900  | -0.74593900 |
| C | -4.52423900  | 5.01093200  | -0.52955500 |
| C | -3.30057300  | 5.69197600  | -0.50100200 |
| C | -5.77470500  | 5.68860600  | -0.58562600 |
| C | -6.98142900  | 5.00868500  | -0.62725100 |
| C | -8.25380800  | 5.68933800  | -0.69392300 |
| H | -3.30172400  | 6.77932500  | -0.51523300 |
| H | -5.77507500  | 6.77614700  | -0.59771700 |
| H | -8.25193200  | 6.77634600  | -0.70157400 |
| H | -10.37113100 | 5.54046000  | -0.79651500 |
| C | -0.83686600  | -1.43748200 | -0.37407900 |
| C | -0.83059100  | -2.86220600 | -0.38529000 |
| C | 0.39923200   | -0.72127300 | -0.32426500 |
| C | -0.83033400  | 2.86049300  | -0.39189500 |
| C | -0.83681900  | 1.43537600  | -0.36973800 |
| C | 0.39841100   | 0.71957600  | -0.34177200 |
| C | -10.65216900 | -2.84345200 | -0.81170300 |
| C | -10.67707300 | -1.43210800 | -0.80677600 |
| C | -11.89362700 | -0.68521200 | -0.87683800 |
| C | -10.65253800 | 2.84285600  | -0.80243000 |
| C | -10.67724800 | 1.43132900  | -0.80204400 |
| C | -11.89380400 | 0.68456500  | -0.87409400 |
| H | -11.59549700 | 3.38257900  | -0.85673500 |
| H | -12.83302700 | 1.22928700  | -0.92731400 |
| H | -12.83278100 | -1.22990500 | -0.93161300 |
| H | -11.59507800 | -3.38309700 | -0.86775800 |
| C | -5.23532700  | 1.33374300  | 2.46456000  |
| C | -5.12223400  | -1.27349000 | 2.46909000  |
| C | -7.40127500  | -0.06642600 | 2.33281100  |
| O | -4.66803300  | -2.09795300 | 3.15001800  |
| O | -4.84977600  | 2.19480900  | 3.14332100  |

|   |             |             |             |             |             |             |             |
|---|-------------|-------------|-------------|-------------|-------------|-------------|-------------|
| O | -8.39936000 | -0.10835400 | 2.92994900  | C           | 7.78944900  | 5.00506400  | -0.31248500 |
| C | 0.40549500  | 3.57013500  | -0.36956400 | C           | 6.58519800  | 5.68591800  | -0.32505400 |
| C | 1.63215400  | 2.87156300  | -0.33487700 | C           | 9.01916600  | 1.42516500  | -0.29588000 |
| C | 0.40490200  | 5.01638400  | -0.39285000 | C           | 9.01898500  | -1.42799900 | -0.29513200 |
| C | -0.83157000 | 5.69422400  | -0.43239500 | C           | 10.25016700 | -0.71464700 | -0.28989200 |
| C | 1.63162300  | 1.43098400  | -0.30053300 | C           | 9.01792100  | -2.85281300 | -0.29652100 |
| C | 1.63139800  | -1.43475700 | -0.30983900 | C           | 10.25031100 | 0.71168100  | -0.29016000 |
| C | 2.87248900  | -0.71685300 | -0.29098300 | C           | 7.79418800  | -3.56356900 | -0.30284600 |
| C | 1.63158800  | -2.87401400 | -0.32355400 | C           | 6.58452000  | -5.68848600 | -0.31672900 |
| C | 2.87412800  | 0.71503300  | -0.30923200 | C           | 7.78895800  | -5.00772000 | -0.30703000 |
| C | 0.40481500  | -3.57277700 | -0.36398900 | H           | 6.58684300  | 6.77355800  | -0.32949700 |
| C | -0.83232000 | -5.69645100 | -0.42460700 | H           | 6.58602500  | -6.77616000 | -0.32030600 |
| C | 0.40421400  | -5.01883600 | -0.38419900 | C           | 10.27035200 | 3.55840200  | -0.29380100 |
| H | -0.83188000 | 6.78152600  | -0.44620900 | C           | 11.46053600 | 2.84126500  | -0.28646200 |
| H | -0.83294400 | -6.78373800 | -0.43799900 | C           | 10.23610200 | 5.00139900  | -0.29689800 |
| C | 2.86756300  | 3.56980800  | -0.33291700 | C           | 9.06314600  | 5.68618700  | -0.30621200 |
| C | 4.09959900  | 2.86014600  | -0.32033900 | C           | 11.48530800 | 1.42767700  | -0.28489400 |
| C | 2.86942700  | 5.01337900  | -0.35297200 | C           | 11.48514400 | -1.43080100 | -0.28449200 |
| C | 4.10778800  | 1.42844300  | -0.30049800 | C           | 12.70286000 | -0.68749500 | -0.27835200 |
| C | 1.63885400  | 5.69397100  | -0.37942600 | C           | 11.46022400 | -2.84434100 | -0.28580000 |
| C | 4.10757000  | -1.43094800 | -0.30162300 | C           | 12.70294400 | 0.68422700  | -0.27839800 |
| C | 5.32683000  | -0.71758400 | -0.29931600 | C           | 10.26999100 | -3.56140700 | -0.29202400 |
| C | 4.09895800  | -2.86232300 | -0.31022100 | C           | 9.06255500  | -5.68902900 | -0.30166000 |
| C | 2.86740400  | -3.57255300 | -0.32525200 | C           | 10.23561300 | -5.00435400 | -0.29432000 |
| C | 5.32750000  | 0.71493600  | -0.30530800 | H           | 9.06149300  | 6.77328200  | -0.30818900 |
| C | 1.63807100  | -5.69691400 | -0.36737400 | H           | 11.18297200 | 5.53570000  | -0.29157100 |
| C | 2.86874900  | -5.01594000 | -0.34193500 | H           | 12.40529300 | 3.38082800  | -0.28199900 |
| H | 1.64026900  | 6.78128000  | -0.39093600 | H           | 13.64368600 | 1.22914300  | -0.27331800 |
| H | 1.63950300  | -6.78421800 | -0.37865000 | H           | 13.64353000 | -1.23253100 | -0.27311400 |
| C | 5.33072200  | 3.56560000  | -0.31881700 | H           | 12.40492800 | -3.38399700 | -0.28123500 |
| C | 6.56005400  | 2.85506400  | -0.30987600 | H           | 11.18242900 | -5.53876100 | -0.28949000 |
| C | 5.33115000  | 5.00878800  | -0.33009400 | H           | 9.06074200  | -6.77614000 | -0.30292100 |
| C | 6.56115400  | 1.42507900  | -0.30286300 | Cr          | 1.58611100  | 0.01067900  | 1.57669900  |
| C | 4.11172000  | 5.69050900  | -0.34822100 | C           | 0.06970300  | -0.13288900 | 2.60052200  |
| C | 6.56095200  | -1.42772800 | -0.30261300 | C           | 2.42658700  | -1.20659600 | 2.66558500  |
| C | 7.78594100  | -0.71655100 | -0.29817200 | C           | 2.16550100  | 1.37924300  | 2.65355300  |
| C | 6.55956000  | -2.85760500 | -0.30454600 | O           | 2.96758600  | -1.98691400 | 3.33719400  |
| C | 7.78621000  | 0.71385000  | -0.29981200 | O           | -0.90574000 | -0.22307600 | 3.22611800  |
| C | 5.33034900  | -3.56801300 | -0.31246700 | O           | 2.53864100  | 2.25739700  | 3.31887000  |
| C | 4.11104800  | -5.69314700 | -0.33608600 |             |             |             |             |
| C | 5.33059100  | -5.01116100 | -0.32118200 | <b>18-e</b> |             |             |             |
| H | 4.11356500  | 6.77790500  | -0.35740600 | C           | -7.18618100 | 0.71791500  | -0.50433400 |
| H | 4.11309000  | -6.78058800 | -0.34460200 | C           | -5.95522800 | 1.42945200  | -0.44737300 |
| C | 7.79454600  | 3.56081400  | -0.30668100 | C           | -7.18551600 | -0.71974900 | -0.49134900 |
| C | 9.01827900  | 2.84999700  | -0.29867400 | C           | -4.71124400 | 0.71419600  | -0.43190400 |

|    |              |             |             |   |              |             |             |
|----|--------------|-------------|-------------|---|--------------|-------------|-------------|
| C  | -5.95467400  | -1.43275200 | -0.45570400 | H | -8.45441000  | 6.77528500  | -0.61492900 |
| C  | -4.71233900  | -0.71591700 | -0.41901700 | H | -10.57468800 | 5.53942300  | -0.68335400 |
| Cr | -6.02983700  | 0.00402600  | 1.42372800  | C | -1.02627200  | -1.43091500 | -0.38324300 |
| C  | -3.47680600  | 1.42905800  | -0.40861900 | C | -1.02727000  | -2.86066000 | -0.39014000 |
| C  | -3.48581900  | 2.86051100  | -0.43051500 | C | 0.20210500   | -0.72078200 | -0.35886600 |
| C  | -5.95433300  | 2.86929300  | -0.48044900 | C | -1.02772300  | 2.85911900  | -0.39210500 |
| C  | -4.72577100  | 3.56877700  | -0.46176000 | C | -1.02648300  | 1.42909200  | -0.38061400 |
| C  | -5.95401800  | -2.87171000 | -0.47362200 | C | 0.20145200   | 0.71907500  | -0.36301200 |
| C  | -7.18682800  | -3.56881300 | -0.53102500 | C | -10.85548900 | -2.84425600 | -0.68310300 |
| C  | -8.42613700  | -1.43617000 | -0.56088300 | C | -10.88050400 | -1.43297300 | -0.68010500 |
| C  | -8.41712300  | -2.85474700 | -0.57202600 | C | -12.09813700 | -0.68623800 | -0.73595300 |
| C  | -2.25744100  | 0.71685000  | -0.39717200 | C | -10.85617500 | 2.84184500  | -0.68236600 |
| C  | -2.25759100  | -0.71871900 | -0.39340500 | C | -10.88084200 | 1.43034500  | -0.67970400 |
| C  | -3.47654300  | -1.43103900 | -0.41146000 | C | -12.09840500 | 0.68338600  | -0.73522000 |
| C  | -4.72521100  | -3.57128600 | -0.45912900 | H | -11.79970800 | 3.38154600  | -0.72557700 |
| C  | -3.48550600  | -2.86224500 | -0.42571200 | H | -13.03823600 | 1.22802200  | -0.77738500 |
| C  | -9.64645200  | -0.71793300 | -0.61952800 | H | -13.03782400 | -1.23114500 | -0.77798600 |
| C  | -9.64690600  | 0.71546100  | -0.62106300 | H | -11.79894800 | -3.38412300 | -0.72632200 |
| C  | -8.42644800  | 1.43385100  | -0.55892400 | C | -5.43429400  | 1.35667500  | 2.51422400  |
| C  | -7.18713800  | 3.56612400  | -0.53331600 | C | -5.24376100  | -1.23969000 | 2.52488400  |
| C  | -8.41759700  | 2.85268500  | -0.57544000 | C | -7.56273500  | -0.10338800 | 2.42125100  |
| C  | -2.26227500  | -3.56918700 | -0.41522600 | O | -4.74375000  | -2.04024700 | 3.20359600  |
| C  | -2.26258700  | -5.01502500 | -0.43100600 | O | -5.05664400  | 2.22704700  | 3.18654900  |
| C  | -3.50077200  | -5.69313300 | -0.46209400 | O | -8.54861400  | -0.17154600 | 3.03569700  |
| C  | -7.18272200  | -5.01006300 | -0.54969900 | C | 0.20124900   | 3.56808000  | -0.38049700 |
| C  | -8.45581600  | -5.69072100 | -0.60241500 | C | 1.42836100   | 2.86105600  | -0.35773200 |
| C  | -5.97567600  | -5.69003400 | -0.52028900 | C | 0.20197400   | 5.01563000  | -0.39779300 |
| C  | -9.66482000  | -3.56345900 | -0.63309500 | C | -1.03249300  | 5.69403400  | -0.42363100 |
| C  | -9.62871900  | -5.00647300 | -0.64216900 | C | 1.42035100   | 1.43394600  | -0.33700000 |
| C  | -4.72482300  | -5.01201700 | -0.47921300 | C | 1.42056500   | -1.43557300 | -0.34295700 |
| H  | -3.50156500  | -6.78047600 | -0.47463300 | C | 2.66003500   | -0.71990700 | -0.30950800 |
| H  | -5.97602200  | -6.77755100 | -0.53237300 | C | 1.42888000   | -2.86224300 | -0.35481600 |
| H  | -8.45405800  | -6.77771600 | -0.61086500 | C | 2.65811800   | 0.71904000  | -0.32681700 |
| H  | -10.57412200 | -5.54166500 | -0.68230500 | C | 0.20162900   | -3.56954300 | -0.37987900 |
| C  | -2.26261400  | 3.56745000  | -0.41720800 | C | -1.03189900  | -5.69547900 | -0.41931700 |
| C  | -2.26299000  | 5.01344500  | -0.43459600 | C | 0.20252000   | -5.01696400 | -0.39535000 |
| C  | -9.66544600  | 3.56109400  | -0.63410100 | H | -1.03325500  | 6.78134100  | -0.43494800 |
| C  | -9.62931200  | 5.00415800  | -0.64363900 | H | -1.03259300  | -6.78279700 | -0.42977900 |
| C  | -4.72529600  | 5.00970000  | -0.48434400 | C | 2.66802600   | 3.57012800  | -0.35383300 |
| C  | -3.50149700  | 5.69094800  | -0.46794400 | C | 3.89317000   | 2.87150700  | -0.33920600 |
| C  | -5.97624000  | 5.68740000  | -0.52634500 | C | 2.66800700   | 5.01461600  | -0.37623200 |
| C  | -7.18319500  | 5.00762300  | -0.55413000 | C | 3.89241300   | 1.42980500  | -0.30428200 |
| C  | -8.45629100  | 5.68829200  | -0.60631100 | C | 1.43581700   | 5.69410300  | -0.39469500 |
| H  | -3.50263900  | 6.77829900  | -0.48091900 | C | 3.89234900   | -1.43347100 | -0.32013400 |
| H  | -5.97664000  | 6.77493400  | -0.53850000 | C | 5.13217200   | -0.71516700 | -0.31847200 |

|   |             |             |             |             |             |             |             |
|---|-------------|-------------|-------------|-------------|-------------|-------------|-------------|
| C | 3.89334200  | -2.87325100 | -0.33410800 | C           | 8.86344300  | -5.68823800 | -0.41837300 |
| C | 2.66805600  | -3.57239800 | -0.35404400 | C           | 10.03637200 | -5.00348300 | -0.42888400 |
| C | 5.13384000  | 0.71466000  | -0.33650900 | H           | 8.86128500  | 6.77493100  | -0.41879900 |
| C | 1.43614000  | -5.69603300 | -0.39047800 | H           | 10.98252300 | 5.53788000  | -0.43560300 |
| C | 2.66851300  | -5.01665800 | -0.37364200 | H           | 12.20644700 | 3.38255900  | -0.44537700 |
| H | 1.43622100  | 6.78141400  | -0.40744900 | H           | 13.44607000 | 1.23029300  | -0.45838900 |
| H | 1.43608700  | -6.78334600 | -0.40258400 | H           | 13.44596700 | -1.23059900 | -0.46022300 |
| C | 5.12915100  | 3.56884200  | -0.35772700 | H           | 12.20641400 | -3.38261000 | -0.45030400 |
| C | 6.36208200  | 2.85811400  | -0.36716600 | H           | 10.98301000 | -5.53798500 | -0.44189900 |
| C | 5.13064700  | 5.00958500  | -0.37770000 | H           | 8.86187100  | -6.77528600 | -0.42315300 |
| C | 6.37060900  | 1.42881300  | -0.34860400 | Cr          | 3.88836200  | 0.00640700  | 1.56435600  |
| C | 3.90811800  | 5.69123500  | -0.38293300 | C           | 2.40950000  | -0.21466700 | 2.62696300  |
| C | 6.37060200  | -1.42988700 | -0.35444900 | C           | 4.81283800  | -1.17066200 | 2.62858700  |
| C | 7.58784400  | -0.71696600 | -0.37224500 | C           | 4.42969400  | 1.39732800  | 2.63204000  |
| C | 6.36200400  | -2.85878900 | -0.36411600 | O           | 5.40610600  | -1.92586000 | 3.28458900  |
| C | 7.58850400  | 0.71614500  | -0.37627500 | O           | 1.45845300  | -0.35652500 | 3.28080200  |
| C | 5.12975900  | -3.57077300 | -0.35853400 | O           | 4.77801200  | 2.28977900  | 3.29187100  |
| C | 3.90860500  | -5.69363900 | -0.37927200 |             |             |             |             |
| C | 5.13109500  | -5.01119900 | -0.37595400 | <b>18-f</b> |             |             |             |
| H | 3.91013400  | 6.77862600  | -0.39421800 | C           | 7.38771500  | -0.72072100 | -0.40418500 |
| H | 3.91081800  | -6.78098500 | -0.39100100 | C           | 6.15640500  | -1.43348600 | -0.38851000 |
| C | 7.59433100  | 3.56293600  | -0.38704500 | C           | 7.38886100  | 0.71696200  | -0.41984700 |
| C | 8.82060500  | 2.85117400  | -0.40022600 | C           | 4.91370100  | -0.71644400 | -0.37188000 |
| C | 7.58916900  | 5.00682500  | -0.39781000 | C           | 6.15733100  | 1.42876600  | -0.38294600 |
| C | 6.38426800  | 5.68707100  | -0.39423900 | C           | 4.91291800  | 0.71394100  | -0.38788000 |
| C | 8.82312500  | 1.42786800  | -0.39502300 | Cr          | 6.20028000  | 0.00657600  | 1.49386600  |
| C | 8.82310500  | -1.42844100 | -0.39798000 | C           | 3.67829100  | -1.43105000 | -0.38370300 |
| C | 10.05244300 | -0.71408800 | -0.41424900 | C           | 3.68699200  | -2.86204500 | -0.39515900 |
| C | 8.82054100  | -2.85156600 | -0.40204500 | C           | 6.15572300  | -2.87218100 | -0.40355300 |
| C | 10.05266200 | 0.71376800  | -0.41355000 | C           | 4.92621700  | -3.57143600 | -0.40810500 |
| C | 7.59453900  | -3.56360200 | -0.38934100 | C           | 6.15722600  | 2.86837400  | -0.41799500 |
| C | 6.38493800  | -5.68821000 | -0.39309700 | C           | 7.39068700  | 3.56504600  | -0.45238000 |
| C | 7.58961900  | -5.00736400 | -0.39960200 | C           | 8.62984300  | 1.43256700  | -0.45546100 |
| H | 6.38535100  | 6.77464900  | -0.40287300 | C           | 8.62152200  | 2.85138500  | -0.47454900 |
| H | 6.38660800  | -6.77578500 | -0.40230800 | C           | 2.45886400  | -0.71808500 | -0.38444600 |
| C | 10.07110100 | 3.55994200  | -0.41877000 | C           | 2.45876900  | 0.71649500  | -0.38982200 |
| C | 11.26203800 | 2.84263400  | -0.43223500 | C           | 3.67904900  | 1.42873700  | -0.38312000 |
| C | 10.03595900 | 5.00321600  | -0.42369000 | C           | 4.92835700  | 3.56803800  | -0.41827800 |
| C | 8.86296600  | 5.68787900  | -0.41481500 | C           | 3.68838100  | 2.85992200  | -0.40570600 |
| C | 11.28708100 | 1.42969200  | -0.43083100 | C           | 9.85113100  | 0.71384500  | -0.49771600 |
| C | 11.28703400 | -1.42992700 | -0.43294400 | C           | 9.85038200  | -0.71941400 | -0.49390000 |
| C | 12.50540700 | -0.68554200 | -0.44820100 | C           | 8.62899000  | -1.43739100 | -0.45342100 |
| C | 11.26195700 | -2.84274900 | -0.43668700 | C           | 7.38892100  | -3.56969300 | -0.44047500 |
| C | 12.50547400 | 0.68529500  | -0.44689400 | C           | 8.61986700  | -2.85597900 | -0.46269700 |
| C | 10.07123400 | -3.56032800 | -0.42266000 | C           | 2.46469400  | 3.56673600  | -0.40928900 |

|   |             |             |             |   |             |             |             |
|---|-------------|-------------|-------------|---|-------------|-------------|-------------|
| C | 2.46594300  | 5.01249400  | -0.42512300 | O | 4.86701300  | -2.02500100 | 3.25212600  |
| C | 3.70478700  | 5.69020800  | -0.44170800 | O | 8.68956200  | -0.17951500 | 3.14963900  |
| C | 7.38723400  | 5.00664100  | -0.47496300 | C | -0.00104900 | -3.56687200 | -0.40503500 |
| C | 8.66114400  | 5.68700200  | -0.50891500 | C | -1.22936900 | -2.85880800 | -0.40165100 |
| C | 6.18017300  | 5.68652800  | -0.46564700 | C | -0.00137000 | -5.01420700 | -0.41704200 |
| C | 9.87028400  | 3.55954900  | -0.51510600 | C | 1.23221700  | -5.69382600 | -0.42201800 |
| C | 9.83446100  | 5.00263800  | -0.52748900 | C | -1.22734500 | -1.42801400 | -0.39196600 |
| C | 4.92852600  | 5.00904400  | -0.44134600 | C | -1.22660400 | 1.42872800  | -0.39212600 |
| H | 3.70599300  | 6.77758200  | -0.45422300 | C | -2.45884100 | 0.71802000  | -0.38447500 |
| H | 6.18091300  | 6.77406400  | -0.47863700 | C | -1.22799400 | 2.85943800  | -0.39823500 |
| H | 8.65959200  | 6.77398400  | -0.51914800 | C | -2.45879200 | -0.71654500 | -0.38987100 |
| H | 10.78041300 | 5.53772100  | -0.55372100 | C | 0.00104100  | 3.56676300  | -0.40512900 |
| C | 2.46266300  | -3.56832800 | -0.40318400 | C | 1.23539400  | 5.69298200  | -0.42733900 |
| C | 2.46327900  | -5.01414700 | -0.41637800 | C | 0.00136300  | 5.01410000  | -0.41716800 |
| C | 9.86825500  | -3.56503700 | -0.50323100 | H | 1.23211200  | -6.78119400 | -0.43021200 |
| C | 9.83189200  | -5.00810100 | -0.51083100 | H | 1.23597200  | 6.78034000  | -0.43619100 |
| C | 4.92583900  | -5.01238600 | -0.42594800 | C | -2.46473100 | -3.56682700 | -0.40919900 |
| C | 3.70160800  | -5.69286700 | -0.42713100 | C | -3.68842300 | -2.85999700 | -0.40564900 |
| C | 6.17722500  | -5.69067500 | -0.44608600 | C | -2.46597300 | -5.01258500 | -0.42496600 |
| C | 7.38466500  | -5.01113100 | -0.45719400 | C | -3.67907000 | -1.42880200 | -0.38313200 |
| C | 8.65836500  | -5.69203200 | -0.48867700 | C | -1.23540900 | -5.69308300 | -0.42717400 |
| H | 3.70202700  | -6.78025100 | -0.43804800 | C | -3.67827900 | 1.43095800  | -0.38378600 |
| H | 6.17749200  | -6.77822400 | -0.45672400 | C | -4.91364200 | 0.71636400  | -0.37210600 |
| H | 8.65652100  | -6.77904500 | -0.49566000 | C | -3.68698600 | 2.86195900  | -0.39524500 |
| H | 10.77767900 | -5.54356600 | -0.53518000 | C | -2.46266200 | 3.56821700  | -0.40326200 |
| C | 1.22733700  | 1.42794000  | -0.39200700 | C | -4.91293000 | -0.71402400 | -0.38792800 |
| C | 1.22935700  | 2.85870800  | -0.40168900 | C | -1.23221700 | 5.69371600  | -0.42213600 |
| C | 0.00007100  | 0.71723000  | -0.39093800 | C | -2.46327000 | 5.01403000  | -0.41646700 |
| C | 1.22800200  | -2.85954300 | -0.39818700 | H | -1.23600100 | -6.78044800 | -0.43597100 |
| C | 1.22661800  | -1.42881700 | -0.39205300 | H | -1.23212900 | 6.78107900  | -0.43035700 |
| C | -0.00007100 | -0.71727500 | -0.39099000 | C | -4.92839300 | -3.56809900 | -0.41817600 |
| C | 11.06143100 | 2.84004400  | -0.54386200 | C | -6.15725700 | -2.86841000 | -0.41794200 |
| C | 11.08587800 | 1.42850100  | -0.53848500 | C | -4.92856900 | -5.00909900 | -0.44116800 |
| C | 12.30399200 | 0.68124900  | -0.57404300 | C | -6.15734800 | -1.42885900 | -0.38300000 |
| C | 11.05962500 | -2.84612800 | -0.53563700 | C | -3.70483100 | -5.69029300 | -0.44150100 |
| C | 11.08496800 | -1.43480400 | -0.53436300 | C | -6.15637100 | 1.43341000  | -0.38853100 |
| C | 12.30344700 | -0.68835900 | -0.57257900 | C | -7.38769400 | 0.72068300  | -0.40437700 |
| H | 12.00352500 | -3.38625400 | -0.56329200 | C | -6.15570200 | 2.87211300  | -0.40361500 |
| H | 13.24355000 | -1.23351500 | -0.59924600 | C | -7.38885100 | -0.71699900 | -0.41985000 |
| H | 13.24445300 | 1.22567500  | -0.60265500 | C | -4.92619500 | 3.57134000  | -0.40816200 |
| H | 12.00560400 | 3.37955500  | -0.57347500 | C | -3.70159100 | 5.69274900  | -0.42720100 |
| C | 5.38742800  | -1.23008000 | 2.58137800  | C | -4.92580700 | 5.01227300  | -0.42599100 |
| C | 5.59306400  | 1.36259900  | 2.57172100  | H | -3.70604600 | -6.77767200 | -0.45395100 |
| C | 7.71516700  | -0.10712300 | 2.51752700  | H | -3.70201400 | 6.78013100  | -0.43811600 |
| O | 5.20640100  | 2.23436200  | 3.23771100  | C | -7.39070300 | -3.56507500 | -0.45235300 |



|             |              |             |             |    |              |             |             |
|-------------|--------------|-------------|-------------|----|--------------|-------------|-------------|
| C           | -8.62152000  | -2.85139900 | -0.47458700 | C  | -4.38090800  | 0.71734400  | -0.30623500 |
| C           | -7.38728000  | -5.00666600 | -0.47485200 | C  | -5.62126500  | -1.43191900 | -0.33912500 |
| C           | -6.18022800  | -5.68658100 | -0.46545300 | C  | -4.38092400  | -0.71681200 | -0.30711400 |
| C           | -8.62983400  | -1.43259300 | -0.45557000 | Cr | -5.69624600  | -0.00068700 | 1.36015600  |
| C           | -8.62894900  | 1.43737300  | -0.45342900 | C  | -3.14164300  | 1.43300300  | -0.27236000 |
| C           | -9.85036200  | 0.71939600  | -0.49395800 | C  | -3.15143500  | 2.86187500  | -0.28596500 |
| C           | -8.61982500  | 2.85595500  | -0.46269300 | C  | -5.62093300  | 2.87397600  | -0.35502400 |
| C           | -9.85111500  | -0.71385500 | -0.49778900 | C  | -4.39448000  | 3.57281600  | -0.32471800 |
| C           | -7.38886700  | 3.56963100  | -0.44046100 | C  | -5.62102500  | -2.87338700 | -0.35711800 |
| C           | -6.17716900  | 5.69058600  | -0.44608200 | C  | -6.85436000  | -3.56958600 | -0.42399100 |
| C           | -7.38460400  | 5.01107100  | -0.45715000 | C  | -8.09951900  | -1.43426100 | -0.47162100 |
| H           | -6.18097100  | -6.77412100 | -0.47838100 | C  | -8.08842700  | -2.85363100 | -0.48270200 |
| H           | -6.17741500  | 6.77813400  | -0.45668700 | C  | -1.92407900  | 0.72019700  | -0.24954400 |
| C           | -9.87029000  | -3.55955200 | -0.51515300 | C  | -1.92411100  | -0.71980200 | -0.24998000 |
| C           | -11.06142200 | -2.84004200 | -0.54394100 | C  | -3.14171200  | -1.43253800 | -0.27297800 |
| C           | -9.83449000  | -5.00263700 | -0.52747900 | C  | -4.39462700  | -3.57228100 | -0.32671000 |
| C           | -8.66119500  | -5.68700800 | -0.50882300 | C  | -3.15155900  | -2.86140500 | -0.28740200 |
| C           | -11.08586600 | -1.42849600 | -0.53856900 | C  | -9.31808700  | -0.71788300 | -0.54384700 |
| C           | -11.08494600 | 1.43479800  | -0.53436500 | C  | -9.31806800  | 0.71873400  | -0.54327000 |
| C           | -12.30344200 | 0.68836500  | -0.57259500 | C  | -8.09947700  | 1.43502600  | -0.47054800 |
| C           | -11.05960000 | 2.84614500  | -0.53558000 | C  | -6.85425200  | 3.57027600  | -0.42152600 |
| C           | -12.30398600 | -0.68124600 | -0.57410400 | C  | -8.08834600  | 2.85440400  | -0.48056600 |
| C           | -9.86821000  | 3.56503300  | -0.50316300 | C  | -1.92737900  | -3.56809700 | -0.25985100 |
| C           | -8.65828900  | 5.69200300  | -0.48856800 | C  | -1.92836300  | -5.01515800 | -0.26937100 |
| C           | -9.83182600  | 5.00810200  | -0.51070800 | C  | -3.16738900  | -5.69386400 | -0.31212400 |
| H           | -8.65965400  | -6.77399200 | -0.51901500 | C  | -6.84987300  | -5.00993800 | -0.44159200 |
| H           | -10.78045200 | -5.53769900 | -0.55372700 | C  | -8.12322200  | -5.68945300 | -0.50805100 |
| H           | -12.00560500 | -3.37953600 | -0.57354800 | C  | -5.64257800  | -5.69273600 | -0.39767900 |
| H           | -13.24444600 | -1.22567800 | -0.60271400 | C  | -9.33411800  | -3.56198800 | -0.55441500 |
| H           | -13.24354100 | 1.23353800  | -0.59923900 | C  | -9.29624800  | -5.00517200 | -0.56114600 |
| H           | -12.00350400 | 3.38627600  | -0.56321100 | C  | -4.39270100  | -5.01461200 | -0.34469700 |
| H           | -10.77761300 | 5.54358000  | -0.53501300 | H  | -3.16663500  | -6.78150400 | -0.32302800 |
| H           | -8.65641700  | 6.77901600  | -0.49550700 | H  | -5.64412300  | -6.78042800 | -0.40973200 |
| Cr          | -6.20035500  | -0.00632100 | 1.49398500  | H  | -8.12221900  | -6.77671400 | -0.51760300 |
| C           | -5.39238400  | 1.23364800  | 2.58128300  | H  | -10.24064900 | -5.54161000 | -0.61375500 |
| C           | -7.71570400  | 0.10165000  | 2.51748300  | C  | -1.92719900  | 3.56849400  | -0.25873500 |
| C           | -5.58767000  | -1.35983800 | 2.57192000  | C  | -1.92811100  | 5.01555500  | -0.26792000 |
| O           | -8.69051900  | 0.17041100  | 3.14938400  | C  | -9.33401700  | 3.56285000  | -0.55185300 |
| O           | -4.87508200  | 2.03075400  | 3.25187200  | C  | -9.29609900  | 5.00603800  | -0.55770500 |
| O           | -5.19728000  | -2.22998300 | 3.23785600  | C  | -4.39249700  | 5.01515600  | -0.34216100 |
| <b>19-a</b> |              |             |             | C  | -3.16712900  | 5.69434700  | -0.30988800 |
| C           | -6.85772800  | 0.71634100  | -0.40363800 | C  | -5.64236700  | 5.69337000  | -0.39445600 |
| C           | -5.62122000  | 1.43251900  | -0.33811100 | C  | -6.84970800  | 5.01063900  | -0.43840300 |
| C           | -6.85774100  | -0.71565900 | -0.40447200 | C  | -8.12304200  | 5.69024500  | -0.50431800 |
|             |              |             |             | H  | -3.16632400  | 6.78199200  | -0.32053800 |

|   |              |             |             |   |             |             |             |
|---|--------------|-------------|-------------|---|-------------|-------------|-------------|
| H | -5.64385900  | 6.78106900  | -0.40608200 | H | 1.77103300  | 6.78020200  | -0.17451800 |
| H | -8.12199200  | 6.77751200  | -0.51328500 | H | 1.77066200  | -6.78004700 | -0.17399100 |
| H | -10.24048600 | 5.54253800  | -0.60992000 | C | 5.45873500  | 3.56496500  | -0.07715600 |
| C | -0.69183900  | -1.42906200 | -0.22249500 | C | 6.68590600  | 2.85561800  | -0.04744900 |
| C | -0.69326800  | -2.85975000 | -0.22690000 | C | 5.45953900  | 5.00719900  | -0.07839800 |
| C | 0.53640300   | -0.71694100 | -0.19323600 | C | 6.68498300  | 1.42416400  | -0.04674900 |
| C | -0.69311800  | 2.86007900  | -0.22630000 | C | 4.23914600  | 5.68931900  | -0.10909100 |
| C | -0.69176200  | 1.42939200  | -0.22230800 | C | 6.68491500  | -1.42418500 | -0.04615400 |
| C | 0.53644100   | 0.71720300  | -0.19311400 | C | 7.91130100  | -0.71444300 | -0.01740100 |
| C | -10.52797800 | -2.84381100 | -0.61633800 | C | 6.68577000  | -2.85564600 | -0.04616100 |
| C | -10.55315100 | -1.43401400 | -0.61473600 | C | 7.91133600  | 0.71437700  | -0.01779800 |
| C | -11.76982100 | -0.68435800 | -0.68172500 | C | 5.45855800  | -3.56494500 | -0.07585900 |
| C | -10.52789300 | 2.84475100  | -0.61427500 | C | 4.23884700  | -5.68927900 | -0.10749300 |
| C | -10.55310800 | 1.43495100  | -0.61367600 | C | 5.45929100  | -5.00719900 | -0.07656300 |
| C | -11.76979900 | 0.68538200  | -0.68122900 | H | 4.24080900  | 6.77696300  | -0.11049700 |
| H | -11.46987100 | 3.38661800  | -0.66819300 | H | 4.24045400  | -6.77694200 | -0.10858900 |
| H | -12.70972400 | 1.22946200  | -0.73441400 | C | 7.92096400  | 3.56127300  | -0.01874900 |
| H | -12.70976200 | -1.22837100 | -0.73532000 | C | 9.14489700  | 2.85072800  | 0.01007200  |
| H | -11.46997100 | -3.38561400 | -0.67062500 | C | 7.91648900  | 5.00459300  | -0.01959200 |
| C | 0.53702900   | 3.56734600  | -0.19740700 | C | 6.71174100  | 5.68512400  | -0.04867700 |
| C | 1.76470100   | 2.85950300  | -0.16602300 | C | 9.14523500  | 1.42603800  | 0.01060200  |
| C | 0.53677500   | 5.01426700  | -0.20185500 | C | 9.14517000  | -1.42614700 | 0.01139800  |
| C | -0.69810500  | 5.69420200  | -0.23761500 | C | 10.37585900 | -0.71340400 | 0.03960700  |
| C | 1.76433700   | 1.42660700  | -0.16425900 | C | 9.14476900  | -2.85084100 | 0.01168900  |
| C | 1.76425900   | -1.42640900 | -0.16413900 | C | 10.37589100 | 0.71325300  | 0.03916500  |
| C | 2.99498200   | -0.71501800 | -0.13433600 | C | 7.92080000  | -3.56134600 | -0.01694500 |
| C | 1.76454300   | -2.85931000 | -0.16585300 | C | 6.71146700  | -5.68518200 | -0.04615300 |
| C | 2.99502100   | 0.71515500  | -0.13446000 | C | 7.91625700  | -5.00468300 | -0.01705800 |
| C | 0.53683300   | -3.56708600 | -0.19759700 | H | 6.71285500  | 6.77295900  | -0.04940000 |
| C | -0.69841100  | -5.69387600 | -0.23854400 | H | 6.71252600  | -6.77303100 | -0.04639500 |
| C | 0.53649700   | -5.01401900 | -0.20208400 | C | 10.39637900 | 3.55907500  | 0.03878900  |
| H | -0.69704000  | 6.78179700  | -0.24315500 | C | 11.58688900 | 2.84197500  | 0.06640500  |
| H | -0.69739800  | -6.78147600 | -0.24417900 | C | 10.36242400 | 5.00180000  | 0.03767000  |
| C | 2.99862900   | 3.56666200  | -0.13683900 | C | 9.18938300  | 5.68617400  | 0.01010900  |
| C | 4.22467000   | 2.85847100  | -0.10626400 | C | 11.61123900 | 1.42934100  | 0.06730000  |
| C | 2.99962900   | 5.01134000  | -0.13905900 | C | 11.61117400 | -1.42953500 | 0.06822400  |
| C | 4.22389100   | 1.42465500  | -0.10527600 | C | 12.82877700 | -0.68577000 | 0.09593600  |
| C | 1.76968400   | 5.69261600  | -0.17171900 | C | 11.58676100 | -2.84217000 | 0.06823200  |
| C | 4.22381800   | -1.42457500 | -0.10490400 | C | 12.82880800 | 0.68553900  | 0.09548000  |
| C | 5.45230400   | -0.71402800 | -0.07536800 | C | 10.39621700 | -3.55923300 | 0.04095500  |
| C | 4.22452100   | -2.85839800 | -0.10545700 | C | 9.18912200  | -5.68630700 | 0.01330600  |
| C | 2.99843800   | -3.56652900 | -0.13620600 | C | 10.36219400 | -5.00196300 | 0.04069600  |
| C | 5.45234200   | 0.71405700  | -0.07567300 | H | 9.18719000  | 6.77341700  | 0.00975400  |
| C | 1.76936600   | -5.69244600 | -0.17130200 | H | 11.30916800 | 5.53610900  | 0.05974200  |
| C | 2.99935900   | -5.01122800 | -0.13815300 | H | 12.53137200 | 3.38179000  | 0.08817000  |

|             |             |             |             |   |             |             |             |
|-------------|-------------|-------------|-------------|---|-------------|-------------|-------------|
| H           | 13.76922400 | 1.23082800  | 0.11701200  | C | 4.31120400  | 5.68893400  | -0.25431500 |
| H           | 13.76916800 | -1.23108900 | 0.11783900  | C | 7.98806300  | 5.00221400  | -0.36042100 |
| H           | 12.53121700 | -3.38201600 | 0.09041200  | C | 9.26091700  | 5.68326900  | -0.39754000 |
| H           | 11.30891000 | -5.53630600 | 0.06326100  | C | 6.78341800  | 5.68328100  | -0.32760000 |
| H           | 9.18687800  | -6.77355700 | 0.01356900  | C | 10.46751000 | 3.55587100  | -0.42338100 |
| C           | -6.49141500 | -1.23023600 | 2.94544600  | C | 10.43384100 | 4.99846400  | -0.42727200 |
| C           | -5.07186300 | -1.23066400 | 3.02261000  | C | 5.53063600  | 5.00646900  | -0.28925600 |
| C           | -4.36534600 | -0.00219600 | 3.07413100  | H | 4.31391000  | 6.77659000  | -0.25833000 |
| C           | -5.07194200 | 1.22631400  | 3.02490000  | H | 6.78528900  | 6.77112400  | -0.33009400 |
| C           | -6.49149200 | 1.22593700  | 2.94774700  | H | 9.25911600  | 6.77050900  | -0.40076900 |
| C           | -7.20015700 | -0.00214300 | 2.92142300  | H | 11.38055700 | 5.53255600  | -0.45473400 |
| H           | -7.02892700 | -2.16834900 | 2.84854300  | C | 3.06718700  | -3.56908800 | -0.16992900 |
| H           | -4.52705100 | -2.16901500 | 2.98907200  | C | 3.06715000  | -5.01541000 | -0.16880100 |
| H           | -3.27953500 | -0.00216500 | 3.07138800  | C | 10.46629500 | -3.56327900 | -0.39155800 |
| H           | -4.52718900 | 2.16476400  | 2.99316700  | C | 10.43208700 | -5.00584500 | -0.38286800 |
| H           | -7.02908300 | 2.16420200  | 2.85271300  | C | 5.52893100  | -5.01076300 | -0.24186700 |
| H           | -8.27932800 | -0.00206000 | 2.80208900  | C | 4.30901600  | -5.69236100 | -0.20284600 |
|             |             |             |             | C | 6.78140900  | -5.68843500 | -0.27515700 |
|             |             |             |             | C | 7.98634100  | -5.00811100 | -0.31436500 |
| <b>19-c</b> |             |             |             | C | 9.25892500  | -5.68994200 | -0.34651000 |
| C           | 7.98282200  | -0.71712300 | -0.34051000 | H | 4.31107400  | -6.78006400 | -0.20018600 |
| C           | 6.75530600  | -1.42723100 | -0.30240000 | H | 6.78281400  | -6.77629200 | -0.26882600 |
| C           | 7.98305700  | 0.71119300  | -0.34740600 | H | 9.25671300  | -6.77718500 | -0.34043600 |
| C           | 5.52418300  | -0.71741000 | -0.27169100 | H | 11.37858900 | -5.54052200 | -0.40629500 |
| C           | 6.75575400  | 1.42209600  | -0.31671900 | C | 1.84781200  | 1.43281100  | -0.15219200 |
| C           | 5.52435000  | 0.71304500  | -0.27925900 | C | 1.83855100  | 2.86152000  | -0.16100500 |
| C           | 4.29705100  | -1.42933000 | -0.22866100 | C | 0.60912300  | 0.71787400  | -0.09598300 |
| C           | 4.29624200  | -2.86054000 | -0.21698000 | C | 1.83754600  | -2.86294700 | -0.12821600 |
| C           | 6.75583200  | -2.85866400 | -0.29279800 | C | 1.84747900  | -1.43443200 | -0.13167700 |
| C           | 5.52950600  | -3.56755100 | -0.25090700 | C | 0.60918300  | -0.71757500 | -0.08285300 |
| C           | 6.75676200  | 2.85351000  | -0.32090100 | C | 11.65763900 | 2.83828100  | -0.45197600 |
| C           | 7.99277100  | 3.55881500  | -0.35702100 | C | 11.68206500 | 1.42539000  | -0.44705800 |
| C           | 9.21598900  | 1.42252000  | -0.38293300 | C | 12.89901200 | 0.68146900  | -0.47542700 |
| C           | 9.21558100  | 2.84805200  | -0.38791500 | C | 11.65668400 | -2.84638700 | -0.42689600 |
| C           | 3.06495200  | -0.72083700 | -0.19278600 | C | 11.68159400 | -1.43352500 | -0.43442500 |
| C           | 3.06499600  | 0.71805500  | -0.20202800 | C | 12.89878700 | -0.69029400 | -0.46941700 |
| C           | 4.29743900  | 1.42580200  | -0.24489300 | H | 12.60099600 | -3.38647900 | -0.44927700 |
| C           | 5.53062300  | 3.56319000  | -0.28658700 | H | 13.83914500 | -1.23565200 | -0.49146100 |
| C           | 4.29718100  | 2.85697300  | -0.24778800 | H | 13.83955200 | 1.22629700  | -0.50224900 |
| C           | 10.44657000 | 0.70941600  | -0.41212300 | H | 12.60215000 | 3.37781500  | -0.47883500 |
| C           | 10.44632900 | -0.71682000 | -0.40567500 | C | 0.59947600  | -3.57477200 | -0.09000500 |
| C           | 9.21552300  | -1.42919100 | -0.36971600 | C | -0.63002600 | -2.87608400 | -0.05312300 |
| C           | 7.99158300  | -3.56473600 | -0.32358800 | C | 0.60074200  | -5.02089200 | -0.11992100 |
| C           | 9.21464000  | -2.85471000 | -0.36169200 | C | 1.83916800  | -5.69620400 | -0.14489700 |
| C           | 3.06829200  | 3.56658800  | -0.20715400 | C | -0.62941500 | -1.43463600 | -0.00929700 |
| C           | 3.06898000  | 5.01298200  | -0.21399000 |   |             |             |             |

|   |             |             |             |    |              |             |             |
|---|-------------|-------------|-------------|----|--------------|-------------|-------------|
| C | -0.62928500 | 1.43606600  | -0.02741000 | C  | -9.16662700  | -0.71224900 | -1.25332300 |
| C | -1.87365200 | 0.72142300  | -0.02749500 | C  | -6.75851000  | 3.57260900  | -0.69632400 |
| C | -0.62884100 | 2.87713800  | -0.07555700 | C  | -5.55796900  | 5.69667800  | -0.53564400 |
| C | -1.87352000 | -0.71990000 | -0.02276200 | C  | -6.75052100  | 5.01360000  | -0.71906700 |
| C | 0.60089300  | 3.57431800  | -0.12108800 | H  | -5.55065100  | -6.77865400 | -0.63897600 |
| C | 1.84170100  | 5.69468100  | -0.18738400 | H  | -5.55620100  | 6.78411300  | -0.56148800 |
| C | 0.60282800  | 5.02054300  | -0.15199900 | C  | -9.18038600  | -3.55558100 | -1.28095400 |
| H | 1.84147300  | -6.78379900 | -0.15841100 | C  | -10.34795400 | -2.83657500 | -1.53330100 |
| H | 1.84482300  | 6.78220500  | -0.20345600 | C  | -9.14294900  | -4.99904500 | -1.28670900 |
| C | -1.86330100 | -3.57506500 | -0.10895200 | C  | -7.99254900  | -5.68459300 | -1.05696300 |
| C | -3.09645400 | -2.86349100 | -0.16756800 | C  | -10.37343000 | -1.42668500 | -1.52882200 |
| C | -1.86146300 | -5.02103100 | -0.16901600 | C  | -10.37774700 | 1.44074900  | -1.49579600 |
| C | -3.10198500 | -1.43784200 | -0.09691600 | C  | -11.56644100 | 0.69300000  | -1.76954900 |
| C | -0.63243200 | -5.70214500 | -0.14299600 | C  | -10.35619900 | 2.85052600  | -1.46909000 |
| C | -3.10243400 | 1.43971100  | -0.09216200 | C  | -11.56429000 | -0.67636500 | -1.78552000 |
| C | -4.32673800 | 0.72163500  | -0.21984900 | C  | -9.18972100  | 3.56682400  | -1.20519400 |
| C | -3.09644600 | 2.86553600  | -0.15741100 | C  | -8.00316000  | 5.69365500  | -0.95683600 |
| C | -1.86226800 | 3.57668600  | -0.11525500 | C  | -9.15473800  | 5.01017500  | -1.18674000 |
| C | -4.32569800 | -0.71933900 | -0.22854300 | H  | -7.98971600  | -6.77178100 | -1.07418700 |
| C | -0.62993100 | 5.70265000  | -0.16113400 | H  | -10.06812300 | -5.53381300 | -1.48802500 |
| C | -1.86007000 | 5.02260900  | -0.17044000 | H  | -11.26875200 | -3.37742000 | -1.74187600 |
| H | -0.63173500 | -6.78907500 | -0.17604800 | H  | -12.48226900 | -1.21985400 | -1.99592800 |
| H | -0.62883700 | 6.78961200  | -0.19226200 | H  | -12.48606600 | 1.23842600  | -1.96733900 |
| C | -4.32539400 | -3.57234600 | -0.33526200 | H  | -11.27858500 | 3.39332200  | -1.66516300 |
| C | -5.54480400 | -2.87172300 | -0.49780400 | H  | -10.08217300 | 5.54667200  | -1.37241800 |
| C | -4.31697500 | -5.01552100 | -0.39696900 | H  | -8.00148000  | 6.78097900  | -0.95832300 |
| C | -5.55274600 | -1.43216800 | -0.44279500 | Cr | -5.96064800  | -0.02395900 | 1.23963700  |
| C | -3.09940500 | -5.69591700 | -0.28672500 | C  | -5.47144600  | 0.92174000  | 3.11522500  |
| C | -5.55608300 | 1.43501900  | -0.41545500 | C  | -6.77523300  | 1.32649700  | 2.72460000  |
| C | -6.76462600 | 0.71850700  | -0.69154800 | C  | -7.75043900  | 0.35194400  | 2.40297800  |
| C | -5.54892600 | 2.87551800  | -0.45422400 | C  | -7.42461700  | -1.02856000 | 2.45981800  |
| C | -6.76227600 | -0.71333400 | -0.70837900 | C  | -6.13092700  | -1.43599900 | 2.87901300  |
| C | -4.32756400 | 3.57520500  | -0.30211300 | C  | -5.15989600  | -0.46222800 | 3.21010700  |
| C | -3.09941900 | 5.69838500  | -0.26336800 | H  | -4.71266700  | 1.67287000  | 3.31089700  |
| C | -4.31924600 | 5.01890600  | -0.35506100 | H  | -7.00371500  | 2.38122000  | 2.60708600  |
| H | -3.09716000 | -6.78261700 | -0.33409800 | H  | -8.72231300  | 0.66112800  | 2.03154500  |
| H | -3.09781300 | 6.78529700  | -0.30531400 | H  | -8.15026700  | -1.76936700 | 2.14027800  |
| C | -6.75209300 | -3.56609600 | -0.75814800 | H  | -5.86756700  | -2.48908100 | 2.88396200  |
| C | -7.96234800 | -2.84871700 | -1.00544200 | Cr | -0.51336500  | 0.02152700  | 1.69840700  |
| C | -6.74302300 | -5.00697200 | -0.79664200 | C  | -1.34275300  | -0.91759500 | 3.44969900  |
| C | -5.55298200 | -5.69148700 | -0.60337800 | C  | 0.00995500   | -1.33024000 | 3.31804900  |
| C | -7.97517700 | -1.43036300 | -0.98932700 | C  | 1.03109800   | -0.36293100 | 3.17523300  |
| C | -7.97919300 | 1.43911700  | -0.95676500 | C  | 0.70677600   | 1.02059600  | 3.16195100  |
| C | -9.16882000 | 0.72393700  | -1.23711000 | C  | -0.63829100  | 1.43536600  | 3.34711100  |
| C | -7.96942500 | 2.85732100  | -0.94601700 | C  | -1.65866200  | 0.46858700  | 3.49023800  |

|             |             |             |             |   |             |             |             |
|-------------|-------------|-------------|-------------|---|-------------|-------------|-------------|
| H           | -2.12897000 | -1.66359300 | 3.50410100  | H | 11.18493800 | 5.53807200  | -0.31796400 |
| H           | 0.25025900  | -2.38657300 | 3.24863100  | C | 2.86511100  | -3.57566300 | -0.29844200 |
| H           | 2.05347500  | -0.67862100 | 2.99281900  | C | 2.86648200  | -5.01971300 | -0.31473400 |
| H           | 1.48318300  | 1.75737900  | 2.98390600  | C | 10.27285300 | -3.56020500 | -0.31591500 |
| H           | -0.89223700 | 2.48984600  | 3.30331400  | C | 10.23820900 | -5.00336200 | -0.31673500 |
| H           | -4.16059500 | -0.78023400 | 3.47906900  | C | 5.33100600  | -5.01194000 | -0.30991800 |
| H           | -2.68939400 | 0.79125700  | 3.56285900  | C | 4.11201100  | -5.69428500 | -0.31544200 |
| <b>19-d</b> |             |             |             | C | 6.58655900  | -5.68811400 | -0.31281200 |
| C           | 7.78791300  | -0.71576900 | -0.31008000 | C | 7.79087100  | -5.00729900 | -0.31286500 |
| C           | 6.56246600  | -1.42755400 | -0.30629800 | C | 9.06501000  | -5.68802500 | -0.31552400 |
| C           | 7.78788800  | 0.71593100  | -0.30998000 | H | 4.11579600  | -6.78199500 | -0.32420100 |
| C           | 5.32664700  | -0.71883200 | -0.30137100 | H | 6.58888200  | -6.77599900 | -0.31549100 |
| C           | 6.56242300  | 1.42767800  | -0.30610500 | H | 9.06350600  | -6.77529700 | -0.31664300 |
| C           | 5.32662900  | 0.71892300  | -0.30127400 | H | 11.18514200 | -5.53782300 | -0.31878600 |
| C           | 4.11037900  | -1.43244700 | -0.28922300 | C | 1.63076400  | 1.43437700  | -0.27628200 |
| C           | 4.10075700  | -2.86291700 | -0.29863000 | C | 1.63090900  | 2.87738100  | -0.29498400 |
| C           | 6.56180600  | -2.85716700 | -0.30779400 | C | 0.39245300  | 0.71835400  | -0.31245000 |
| C           | 5.33162900  | -3.56795000 | -0.30426800 | C | 1.63092300  | -2.87737500 | -0.29519700 |
| C           | 6.56172000  | 2.85727800  | -0.30742800 | C | 1.63078000  | -1.43435900 | -0.27646900 |
| C           | 7.79670900  | 3.56282500  | -0.31055000 | C | 0.39245100  | -0.71835200 | -0.31251100 |
| C           | 9.02064900  | 1.42688300  | -0.31263100 | C | 11.46264000 | 2.84352000  | -0.31717500 |
| C           | 9.02000000  | 2.85220800  | -0.31289200 | C | 11.48756000 | 1.42939200  | -0.31708100 |
| C           | 2.87070200  | -0.71717600 | -0.28812900 | C | 12.70503700 | 0.68614700  | -0.31894400 |
| C           | 2.87069800  | 0.71721300  | -0.28801300 | C | 11.46275400 | -2.84323700 | -0.31760300 |
| C           | 4.11034900  | 1.43250200  | -0.28903100 | C | 11.48761500 | -1.42910600 | -0.31729700 |
| C           | 5.33154100  | 3.56803300  | -0.30383300 | C | 12.70506400 | -0.68581400 | -0.31905000 |
| C           | 4.10070800  | 2.86296300  | -0.29831700 | H | 12.40770800 | -3.38268900 | -0.31947100 |
| C           | 10.25259200 | 0.71329000  | -0.31503500 | H | 13.64586500 | -1.23086800 | -0.32057800 |
| C           | 10.25262000 | -0.71304400 | -0.31514100 | H | 13.64581600 | 1.23123900  | -0.32038900 |
| C           | 9.02070100  | -1.42668000 | -0.31283400 | H | 12.40757300 | 3.38300900  | -0.31895600 |
| C           | 7.79683200  | -3.56267700 | -0.31103200 | C | 0.40393000  | -3.57587500 | -0.32780800 |
| C           | 9.02010900  | -2.85201400 | -0.31329500 | C | -0.83656100 | -2.86337600 | -0.35660700 |
| C           | 2.86507100  | 3.57570300  | -0.29810600 | C | 0.40299300  | -5.02201300 | -0.34800100 |
| C           | 2.86641900  | 5.01972200  | -0.31429800 | C | 1.63629400  | -5.70202900 | -0.33305100 |
| C           | 4.11190600  | 5.69427900  | -0.31483900 | C | -0.84535000 | -1.43688600 | -0.34105000 |
| C           | 7.79070200  | 5.00742100  | -0.31219100 | C | -0.84535000 | 1.43687700  | -0.34104700 |
| C           | 9.06480400  | 5.68819300  | -0.31472600 | C | -2.06582500 | 0.72376000  | -0.38106000 |
| C           | 6.58639300  | 5.68817400  | -0.31208500 | C | -0.83655400 | 2.86337300  | -0.35660900 |
| C           | 10.27271200 | 3.56043700  | -0.31539500 | C | -2.06582800 | -0.72378300 | -0.38102100 |
| C           | 10.23802200 | 5.00358700  | -0.31600700 | C | 0.40391700  | 3.57588400  | -0.32768000 |
| C           | 5.33087900  | 5.01198700  | -0.30932500 | C | 1.63624900  | 5.70200600  | -0.33270000 |
| H           | 4.11567300  | 6.78196100  | -0.32348400 | C | 0.40297900  | 5.02201000  | -0.34784000 |
| H           | 6.58870000  | 6.77603700  | -0.31462600 | H | 1.63743700  | -6.78944200 | -0.34471400 |
| H           | 9.06327000  | 6.77545300  | -0.31569400 | H | 1.63736600  | 6.78939600  | -0.34430000 |
|             |             |             |             | C | -2.06655100 | -3.57034700 | -0.39757500 |

|   |              |             |             |             |              |             |             |
|---|--------------|-------------|-------------|-------------|--------------|-------------|-------------|
| C | -3.29383300  | -2.86216500 | -0.43183900 | C           | -10.69155700 | -1.43459400 | -0.82484200 |
| C | -2.06615700  | -5.01860600 | -0.41473100 | C           | -10.69156100 | 1.43450700  | -0.82510400 |
| C | -3.28623900  | -1.43617900 | -0.41352900 | C           | -11.90734700 | 0.68496500  | -0.90268100 |
| C | -0.83730400  | -5.69780200 | -0.38695800 | C           | -10.66639700 | 2.84456700  | -0.82657300 |
| C | -3.28623900  | 1.43615500  | -0.41368300 | C           | -11.90734400 | -0.68506700 | -0.90255700 |
| C | -4.52386000  | 0.71803700  | -0.45791900 | C           | -9.47334200  | 3.56294100  | -0.75454600 |
| C | -3.29382600  | 2.86215600  | -0.43208000 | C           | -8.26248500  | 5.69035200  | -0.69860400 |
| C | -2.06654800  | 3.57033800  | -0.39772200 | C           | -9.43518800  | 5.00607300  | -0.76141100 |
| C | -4.52386300  | -0.71807600 | -0.45777700 | H           | -8.26147700  | -6.77766000 | -0.70766700 |
| C | -0.83731300  | 5.69778800  | -0.38696200 | H           | -10.37900900 | -5.54271500 | -0.82130700 |
| C | -2.06615400  | 5.01860000  | -0.41491200 | H           | -11.60801500 | -3.38622800 | -0.88849300 |
| H | -0.83855800  | -6.78539100 | -0.40181000 | H           | -12.84688100 | -1.22895700 | -0.96399300 |
| H | -0.83859500  | 6.78536700  | -0.40181200 | H           | -12.84688500 | 1.22884100  | -0.96421500 |
| C | -4.53610400  | -3.57344100 | -0.48268400 | H           | -11.60802600 | 3.38613200  | -0.88909000 |
| C | -5.76183400  | -2.87456000 | -0.52385500 | H           | -10.37902300 | 5.54264400  | -0.82222600 |
| C | -4.53259200  | -5.01623500 | -0.50360300 | H           | -8.26150100  | 6.77762000  | -0.70865700 |
| C | -5.76270400  | -1.43293800 | -0.50590000 | Cr          | -5.85597600  | 0.00022300  | 1.19599900  |
| C | -3.30725100  | -5.69547900 | -0.46537600 | C           | -5.25787100  | 1.22947500  | 2.86724900  |
| C | -5.76270600  | 1.43289900  | -0.50619400 | C           | -6.67545600  | 1.22924800  | 2.76928000  |
| C | -6.99858000  | 0.71629400  | -0.58055700 | C           | -7.38350200  | 0.00068500  | 2.72871200  |
| C | -5.76183800  | 2.87453000  | -0.52429800 | C           | -6.67599300  | -1.22818800 | 2.76943100  |
| C | -6.99858200  | -0.71634400 | -0.58037300 | C           | -5.25841400  | -1.22902300 | 2.86744100  |
| C | -4.53610400  | 3.57342000  | -0.48309600 | C           | -4.55264300  | 0.00006800  | 2.92468600  |
| C | -3.30725300  | 5.69547700  | -0.46575500 | H           | -4.71258600  | 2.16791800  | 2.84238700  |
| C | -4.53260000  | 5.01622900  | -0.50410100 | H           | -7.21124200  | 2.16747900  | 2.66435900  |
| H | -3.30735000  | -6.78310300 | -0.48025900 | H           | -8.46044400  | 0.00091600  | 2.59072200  |
| H | -3.30736300  | 6.78310200  | -0.48068500 | H           | -7.21219200  | -2.16619000 | 2.66463700  |
| C | -6.99506700  | -3.57068900 | -0.60236800 | H           | -4.71353600  | -2.16770100 | 2.84270500  |
| C | -8.22799700  | -2.85471100 | -0.67122300 | Cr          | 1.61564800   | -0.00018800 | 1.42915400  |
| C | -6.98973700  | -5.01096400 | -0.62040700 | C           | 0.90383100   | -1.22881100 | 3.05289100  |
| C | -5.78246000  | -5.69377500 | -0.56717900 | C           | 2.32665800   | -1.22891700 | 3.05389300  |
| C | -8.23938900  | -1.43495500 | -0.66010200 | C           | 3.03416300   | -0.00092100 | 3.07528900  |
| C | -8.23939000  | 1.43489600  | -0.66037800 | C           | 2.32693600   | 1.22726600  | 3.05472000  |
| C | -9.45703600  | 0.71836400  | -0.74323300 | C           | 0.90409700   | 1.22747200  | 3.05377400  |
| C | -8.22800500  | 2.85466000  | -0.67172600 | C           | 0.19677300   | -0.00060200 | 3.07500700  |
| C | -9.45703200  | -0.71843700 | -0.74309100 | H           | 0.36135900   | -2.16681400 | 2.98761900  |
| C | -6.99507600  | 3.57065600  | -0.60293900 | H           | 2.86921500   | -2.16673000 | 2.98812600  |
| C | -5.78247200  | 5.69376900  | -0.56785600 | H           | 4.11832500   | -0.00102900 | 3.01468600  |
| C | -6.98975000  | 5.01094200  | -0.62111900 | H           | 2.86971100   | 2.16499700  | 2.98974300  |
| H | -5.78420800  | -6.78146600 | -0.58081900 | H           | 0.36181500   | 2.16563900  | 2.98931300  |
| H | -5.78421800  | 6.78146100  | -0.58158300 | H           | -3.46680800  | -0.00016500 | 2.93742800  |
| C | -9.47332800  | -3.56300400 | -0.75393300 | H           | -0.88761900  | -0.00046700 | 3.01714500  |
| C | -10.66638700 | -2.84465100 | -0.82606800 |             |              |             |             |
| C | -9.43517300  | -5.00613400 | -0.76059600 | <b>19-e</b> |              |             |             |
| C | -8.26246500  | -5.69039300 | -0.69774700 | C           | 7.59055600   | -0.71917800 | -0.37066100 |

|   |             |             |             |   |             |             |             |
|---|-------------|-------------|-------------|---|-------------|-------------|-------------|
| C | 6.37548100  | -1.43196600 | -0.34587700 | H | 3.90968700  | -6.78582100 | -0.37216600 |
| C | 7.59056900  | 0.71921400  | -0.37061600 | H | 6.38975400  | -6.77760500 | -0.38049100 |
| C | 5.13296600  | -0.71607600 | -0.33222800 | H | 8.86496600  | -6.77630700 | -0.39991600 |
| C | 6.37550200  | 1.43202000  | -0.34579600 | H | 10.98585600 | -5.53993600 | -0.42212300 |
| C | 5.13297400  | 0.71614600  | -0.33218300 | C | 1.41443900  | 1.43424100  | -0.34750500 |
| C | 3.89415100  | -1.43286200 | -0.30973200 | C | 1.42476000  | 2.86353900  | -0.35898100 |
| C | 3.89456800  | -2.87620000 | -0.32682400 | C | 0.19800500  | 0.72147200  | -0.37259600 |
| C | 6.36587900  | -2.85972300 | -0.35545000 | C | 1.42476100  | -2.86343400 | -0.35902200 |
| C | 5.12889400  | -3.57379000 | -0.34287400 | C | 1.41444000  | -1.43414900 | -0.34751600 |
| C | 6.36592800  | 2.85978500  | -0.35529100 | C | 0.19801000  | -0.72139100 | -0.37259500 |
| C | 7.59770300  | 3.56430200  | -0.37407900 | C | 11.26681100 | 2.84385400  | -0.42187600 |
| C | 8.82684900  | 1.42952000  | -0.38879500 | C | 11.29141700 | 1.43033800  | -0.42168600 |
| C | 8.82507700  | 2.85241100  | -0.39009000 | C | 12.51001900 | 0.68523900  | -0.43745800 |
| C | 2.65500100  | -0.71706800 | -0.33357800 | C | 11.26674900 | -2.84388100 | -0.42210100 |
| C | 2.65500600  | 0.71715700  | -0.33354900 | C | 11.29138600 | -1.43036800 | -0.42179900 |
| C | 3.89416200  | 1.43294400  | -0.30965700 | H | 12.21145000 | -3.38362100 | -0.43516400 |
| C | 5.12894400  | 3.57386800  | -0.34272100 | H | 13.45066300 | -1.23050600 | -0.44994800 |
| C | 3.89459700  | 2.87629000  | -0.32671600 | H | 13.45069000 | 1.23043300  | -0.44984600 |
| C | 10.05726000 | 0.71448200  | -0.40542000 | H | 12.21152400 | 3.38357700  | -0.43488800 |
| C | 10.05724500 | -0.71449100 | -0.40547300 | C | 0.20012800  | -3.56986600 | -0.37964100 |
| C | 8.82682100  | -1.42950400 | -0.38889300 | C | -1.03284900 | -2.86125700 | -0.39567400 |
| C | 7.59763600  | -3.56425800 | -0.37429700 | C | 0.20074300  | -5.01831700 | -0.38961600 |
| C | 8.82501900  | -2.85239100 | -0.39028700 | C | 1.43280800  | -5.69718300 | -0.38048800 |
| C | 2.66873400  | 3.57521100  | -0.34528400 | C | -1.03302900 | -1.43243000 | -0.39003700 |
| C | 2.66874100  | 5.01935900  | -0.36198900 | C | -1.03304900 | 1.43250000  | -0.39007600 |
| C | 3.90794200  | 5.69844900  | -0.36194300 | C | -2.26437900 | 0.72128700  | -0.40392000 |
| C | 7.59142200  | 5.00885800  | -0.37983400 | C | -1.03288800 | 2.86134300  | -0.39570700 |
| C | 8.86625600  | 5.68905700  | -0.39656100 | C | -2.26436400 | -0.72124000 | -0.40389400 |
| C | 6.38677500  | 5.68980600  | -0.37221700 | C | 0.20010100  | 3.56996300  | -0.37965000 |
| C | 10.07596500 | 3.56096100  | -0.40707800 | C | 1.43280200  | 5.69733500  | -0.38045600 |
| C | 10.03957000 | 5.00460300  | -0.40882700 | C | 0.20070600  | 5.01844600  | -0.38962900 |
| C | 5.13034500  | 5.01479200  | -0.35826500 | H | 1.43202200  | -6.78478800 | -0.39129400 |
| H | 3.90974500  | 6.78597100  | -0.37198300 | H | 1.43201200  | 6.78497000  | -0.39126400 |
| H | 6.38985700  | 6.77770500  | -0.38016900 | C | -2.26717300 | -3.56950400 | -0.41388300 |
| H | 8.86509800  | 6.77634700  | -0.39946700 | C | -3.49075300 | -2.86241700 | -0.42583900 |
| H | 10.98597100 | 5.53992600  | -0.42169100 | C | -2.26734700 | -5.01720600 | -0.42488300 |
| C | 2.66872000  | -3.57511300 | -0.34535700 | C | -3.48101000 | -1.43354600 | -0.41157300 |
| C | 2.66871700  | -5.01923200 | -0.36207700 | C | -1.03661100 | -5.69632800 | -0.41167100 |
| C | 10.07589000 | -3.56096200 | -0.40734300 | C | -3.48104600 | 1.43357100  | -0.41166400 |
| C | 10.03946800 | -5.00459900 | -0.40919500 | C | -4.72160600 | 0.71686400  | -0.42915400 |
| C | 5.13027700  | -5.01469400 | -0.35846000 | C | -3.49082600 | 2.86245400  | -0.42595400 |
| C | 3.90788900  | -5.69832100 | -0.36210100 | C | -2.26724400 | 3.56956600  | -0.41398000 |
| C | 6.38668400  | -5.68972000 | -0.37249100 | C | -4.72158300 | -0.71687200 | -0.42909000 |
| C | 7.59133000  | -5.00880300 | -0.38012700 | C | -1.03669000 | 5.69646400  | -0.41174800 |
| C | 8.86614500  | -5.68902500 | -0.39693800 | C | -2.26744600 | 5.01729800  | -0.42500100 |

|   |              |             |             |             |              |             |             |
|---|--------------|-------------|-------------|-------------|--------------|-------------|-------------|
| H | -1.03691100  | -6.78393300 | -0.42015800 | H           | -13.05494700 | -1.22900100 | -0.74297300 |
| H | -1.03700400  | 6.78410000  | -0.42025300 | H           | -13.05499500 | 1.22868800  | -0.74304200 |
| C | -4.73534500  | -3.57329300 | -0.44935600 | H           | -11.81467300 | 3.38587800  | -0.69516400 |
| C | -5.96119200  | -2.87422000 | -0.46339700 | H           | -10.58463600 | 5.54214400  | -0.65519600 |
| C | -4.73326100  | -5.01518700 | -0.46743200 | H           | -8.46488900  | 6.77716800  | -0.58857100 |
| C | -5.96161400  | -1.43227200 | -0.44655900 | Cr          | -6.01428100  | 0.00007300  | 1.25242800  |
| C | -3.50676200  | -5.69503300 | -0.45161600 | C           | -5.36207500  | 1.22848600  | 2.90499400  |
| C | -5.96165900  | 1.43222500  | -0.44671500 | C           | -6.78252500  | 1.22875800  | 2.85203600  |
| C | -7.19887900  | 0.71610900  | -0.49530100 | C           | -7.49190100  | 0.00079300  | 2.83795300  |
| C | -5.96128700  | 2.87418200  | -0.46358100 | C           | -6.78356200  | -1.22777800 | 2.85214800  |
| C | -7.19885500  | -0.71619200 | -0.49522400 | C           | -5.36311600  | -1.22870800 | 2.90516000  |
| C | -4.73545000  | 3.57329100  | -0.44953800 | C           | -4.65527800  | -0.00041400 | 2.94261900  |
| C | -3.50690400  | 5.69511000  | -0.45180100 | H           | -4.81740800  | 2.16657200  | 2.86208300  |
| C | -4.73340900  | 5.01521000  | -0.46764300 | H           | -7.32143800  | 2.16709500  | 2.76538800  |
| H | -3.50694200  | -6.78267800 | -0.46326600 | H           | -8.57292500  | 0.00124900  | 2.73657000  |
| H | -3.50710700  | 6.78278000  | -0.46347600 | H           | -7.32327800  | -2.16565900 | 2.76563500  |
| C | -7.19596600  | -3.57037200 | -0.51327200 | H           | -4.81924600  | -2.16725300 | 2.86238400  |
| C | -8.43059000  | -2.85437100 | -0.55514900 | Cr          | 3.89571100   | -0.00003500 | 1.38724000  |
| C | -7.19171800  | -5.01032900 | -0.53049600 | C           | 3.19385300   | -1.22803600 | 3.01861600  |
| C | -5.98329800  | -5.69312900 | -0.50330800 | C           | 4.61627700   | -1.22834400 | 3.00966100  |
| C | -8.44155000  | -1.43474400 | -0.54456200 | C           | 5.32469000   | -0.00065500 | 3.02378800  |
| C | -8.44160200  | 1.43461400  | -0.54467100 | C           | 4.61691600   | 1.22742000  | 3.01002100  |
| C | -9.66086600  | 0.71829800  | -0.59990000 | C           | 3.19448600   | 1.22784800  | 3.01903500  |
| C | -8.43069500  | 2.85424500  | -0.55533000 | C           | 2.48636000   | 0.00008600  | 3.04186700  |
| C | -9.66083900  | -0.71847800 | -0.59985100 | H           | 2.65088000   | -2.16603800 | 2.95786600  |
| C | -7.19609200  | 3.57029200  | -0.51349100 | H           | 5.15806400   | -2.16643200 | 2.94091100  |
| C | -5.98348300  | 5.69311900  | -0.50356800 | H           | 6.40841700   | -0.00092200 | 2.95664200  |
| C | -7.19189200  | 5.01026300  | -0.53075600 | H           | 5.15919400   | 2.16525800  | 2.94160200  |
| H | -5.98519500  | -6.78083600 | -0.51538300 | H           | 2.65199400   | 2.16616300  | 2.95863000  |
| H | -5.98540800  | 6.78084200  | -0.51567300 | H           | -3.56968900  | -0.00086900 | 2.92077800  |
| C | -9.67716400  | -3.56279200 | -0.60901800 | H           | 1.40176400   | 0.00038300  | 2.98967700  |
| C | -10.87183200 | -2.84439300 | -0.65431200 |             |              |             |             |
| C | -9.63943400  | -5.00580700 | -0.61580600 | <b>19-f</b> |              |             |             |
| C | -8.46558900  | -5.69001000 | -0.57897500 | C           | 7.39660900   | -0.71584100 | -0.41253300 |
| C | -10.89681300 | -1.43473900 | -0.65293500 | C           | 6.15881300   | -1.43203300 | -0.38012100 |
| C | -10.89686700 | 1.43451300  | -0.65301900 | C           | 7.39663300   | 0.71598800  | -0.41233700 |
| C | -12.11435600 | 0.68471100  | -0.70300600 | C           | 4.91784100   | -0.71686400 | -0.38322400 |
| C | -10.87194100 | 2.84417000  | -0.65447400 | C           | 6.15885100   | 1.43221100  | -0.37978100 |
| C | -12.11432900 | -0.68498700 | -0.70296700 | C           | 4.91785700   | 0.71707000  | -0.38308000 |
| C | -9.67729900  | 3.56262000  | -0.60922400 | C           | 3.67794200   | -1.43247200 | -0.38296000 |
| C | -8.46579600  | 5.68989600  | -0.57926800 | C           | 3.68830900   | -2.86243800 | -0.39642500 |
| C | -9.63962100  | 5.00564000  | -0.61607300 | C           | 6.15911900   | -2.87363400 | -0.39748500 |
| H | -8.46464300  | -6.77727300 | -0.58823800 | C           | 4.93232500   | -3.57293400 | -0.40114500 |
| H | -10.58442800 | -5.54234000 | -0.65490900 | C           | 6.15920700   | 2.87383300  | -0.39689200 |
| H | -11.81454100 | -3.38613800 | -0.69498000 | C           | 7.39379200   | 3.56995800  | -0.42894300 |



|   |             |             |             |   |             |             |             |
|---|-------------|-------------|-------------|---|-------------|-------------|-------------|
| C | 8.64008600  | 1.43464300  | -0.44402400 | C | 11.09676900 | 1.43454100  | -0.51903000 |
| C | 8.62938700  | 2.85383600  | -0.45412000 | C | 12.31514600 | 0.68469200  | -0.55267000 |
| C | 2.46092500  | -0.71987600 | -0.39215000 | C | 11.07154400 | -2.84397800 | -0.52095100 |
| C | 2.46091800  | 0.72009800  | -0.39208700 | C | 11.09669900 | -1.43451500 | -0.51941100 |
| C | 3.67795300  | 1.43269900  | -0.38275900 | C | 12.31511100 | -0.68471800 | -0.55285600 |
| C | 4.93239100  | 3.57316900  | -0.40056300 | H | 12.01459900 | -3.38595500 | -0.54872500 |
| C | 3.68833500  | 2.86269200  | -0.39602800 | H | 13.25608500 | -1.22891600 | -0.58007900 |
| C | 9.86028400  | 0.71833100  | -0.48301500 | H | 13.25614700 | 1.22885600  | -0.57974400 |
| C | 9.86025000  | -0.71826500 | -0.48320300 | H | 12.01477100 | 3.38596000  | -0.54781800 |
| C | 8.64002600  | -1.43453400 | -0.44438700 | C | 0.00005400  | -3.56891300 | -0.40289900 |
| C | 7.39365500  | -3.56978200 | -0.42972100 | C | -1.22876500 | -2.86120400 | -0.40050400 |
| C | 8.62926300  | -2.85370700 | -0.45481900 | C | 0.00008200  | -5.01658100 | -0.41034400 |
| C | 2.46486900  | 3.56966500  | -0.40127600 | C | 1.23439700  | -5.69542700 | -0.41481900 |
| C | 2.46610100  | 5.01647300  | -0.41113100 | C | -1.22721100 | -1.42987800 | -0.39573700 |
| C | 3.70475900  | 5.69483200  | -0.41970600 | C | -1.22727900 | 1.43000500  | -0.39581800 |
| C | 7.38997500  | 5.01005600  | -0.44601500 | C | -2.46095400 | 0.72001400  | -0.39209700 |
| C | 8.66455400  | 5.68962400  | -0.47656100 | C | -1.22890400 | 2.86135700  | -0.40062000 |
| C | 6.18165500  | 5.69302700  | -0.43569200 | C | -2.46091100 | -0.71995900 | -0.39201200 |
| C | 9.87634000  | 3.56227500  | -0.49076900 | C | -0.00006900 | 3.56910800  | -0.40287300 |
| C | 9.83870100  | 5.00538200  | -0.49745400 | C | 1.23427800  | 5.69578000  | -0.41455600 |
| C | 4.93122400  | 5.01506300  | -0.41808500 | C | -0.00009300 | 5.01685000  | -0.41030800 |
| H | 3.70471000  | 6.78251200  | -0.43066600 | H | 1.23434700  | -6.78299600 | -0.42201500 |
| H | 6.18369500  | 6.78075800  | -0.44728600 | H | 1.23419600  | 6.78342000  | -0.42172100 |
| H | 8.66377200  | 6.77691300  | -0.48542700 | C | -2.46478400 | -3.56949700 | -0.40123400 |
| H | 10.78418900 | 5.54188800  | -0.52331600 | C | -3.68822600 | -2.86255800 | -0.39595400 |
| C | 2.46489200  | -3.56941500 | -0.40160200 | C | -2.46596900 | -5.01623500 | -0.41109600 |
| C | 2.46613100  | -5.01615400 | -0.41156200 | C | -3.67789800 | -1.43259600 | -0.38265600 |
| C | 9.87617200  | -3.56218200 | -0.49166400 | C | -1.23421500 | -5.69546900 | -0.41455600 |
| C | 9.83847800  | -5.00526900 | -0.49867400 | C | -3.67799800 | 1.43257700  | -0.38291100 |
| C | 4.93112800  | -5.01477000 | -0.41884600 | C | -4.91787200 | 0.71690800  | -0.38309800 |
| C | 3.70471900  | -5.69447800 | -0.42036600 | C | -3.68843500 | 2.86256000  | -0.39636200 |
| C | 6.18149400  | -5.69274500 | -0.43670600 | C | -2.46500100 | 3.56957400  | -0.40156500 |
| C | 7.38979400  | -5.00984100 | -0.44704500 | C | -4.91781100 | -0.71702800 | -0.38291400 |
| C | 8.66432000  | -5.68945000 | -0.47783500 | C | -1.23449500 | 5.69573200  | -0.41478100 |
| H | 3.70467600  | -6.78209800 | -0.43142900 | C | -2.46627900 | 5.01637800  | -0.41152600 |
| H | 6.18351500  | -6.78043600 | -0.44847200 | H | -1.23411900 | -6.78303800 | -0.42171700 |
| H | 8.66349700  | -6.77671400 | -0.48693000 | H | -1.23445000 | 6.78337000  | -0.42198600 |
| H | 10.78393700 | -5.54179500 | -0.52472200 | C | -4.93221700 | -3.57309400 | -0.40045900 |
| C | 1.22721700  | 1.43004800  | -0.39577000 | C | -6.15903300 | -2.87383000 | -0.39678500 |
| C | 1.22879200  | 2.86140300  | -0.40050600 | C | -4.93097000 | -5.01493200 | -0.41798600 |
| C | -0.00002000 | 0.71859900  | -0.39636400 | C | -6.15876400 | -1.43223200 | -0.37966600 |
| C | 1.22884700  | -2.86116500 | -0.40066100 | C | -3.70454300 | -5.69460100 | -0.41962200 |
| C | 1.22724700  | -1.42983800 | -0.39583400 | C | -6.15889300 | 1.43200600  | -0.38007900 |
| C | 0.00000500  | -0.71842600 | -0.39635800 | C | -7.39665900 | 0.71574500  | -0.41248000 |
| C | 11.07168600 | 2.84401400  | -0.52020100 | C | -6.15929600 | 2.87362500  | -0.39745100 |

|    |              |             |             |           |             |             |             |
|----|--------------|-------------|-------------|-----------|-------------|-------------|-------------|
| C  | -7.39659200  | -0.71608600 | -0.41224900 | C         | -5.51994700 | -1.22790100 | 2.96638400  |
| C  | -4.93251200  | 3.57299300  | -0.40112100 | C         | -4.81226900 | 0.00039800  | 2.99909000  |
| C  | -3.70495900  | 5.69468900  | -0.42035700 | H         | -4.97513400 | 2.16715400  | 2.91710900  |
| C  | -4.93138400  | 5.01487900  | -0.41883600 | H         | -7.48060600 | 2.16708800  | 2.84397700  |
| H  | -3.70446000  | -6.78222400 | -0.43058400 | H         | -8.73184500 | 0.00142900  | 2.83150700  |
| H  | -3.70494100  | 6.78236500  | -0.43143300 | H         | -7.48179900 | -2.16490800 | 2.84556000  |
| C  | -7.39355100  | -3.57002300 | -0.42886700 | H         | -4.97632300 | -2.16629800 | 2.91876200  |
| C  | -8.62917800  | -2.85399700 | -0.45409100 | Cr        | 6.18818000  | -0.00018000 | 1.32029900  |
| C  | -7.38964200  | -5.01008800 | -0.44594300 | C         | 5.51921300  | -1.22889600 | 2.96566300  |
| C  | -6.18132400  | -5.69295100 | -0.43560300 | C         | 6.94053400  | -1.22894400 | 2.92620700  |
| C  | -8.63998500  | -1.43482500 | -0.44399100 | C         | 7.64996000  | -0.00121200 | 2.92225300  |
| C  | -8.64013000  | 1.43436000  | -0.44439100 | C         | 6.94146700  | 1.22707300  | 2.92693600  |
| C  | -9.86029800  | 0.71799700  | -0.48323100 | C         | 5.52013700  | 1.22807700  | 2.96646000  |
| C  | -8.62946500  | 2.85354100  | -0.45482300 | C         | 4.81232800  | -0.00015300 | 2.99927700  |
| C  | -9.86022400  | -0.71859600 | -0.48303100 | H         | 4.97498300  | -2.16690500 | 2.91739900  |
| C  | -7.39389400  | 3.56969900  | -0.42972000 | H         | 7.48041500  | -2.16710400 | 2.84398300  |
| C  | -6.18183200  | 5.69279900  | -0.43670700 | H         | 8.73189600  | -0.00158600 | 2.83127700  |
| C  | -7.39011600  | 5.00979200  | -0.44705000 | H         | 7.48206800  | 2.16489300  | 2.84534800  |
| H  | -6.18330700  | -6.78064500 | -0.44720700 | H         | 4.97660800  | 2.16655300  | 2.91883900  |
| H  | -6.18389800  | 6.78052600  | -0.44847600 | H         | -3.72686100 | 0.00010200  | 2.96786900  |
| C  | -9.87607400  | -3.56251400 | -0.49079100 | H         | 3.72691300  | 0.00027700  | 2.96824700  |
| C  | -11.07145800 | -2.84435400 | -0.52027500 |           |             |             |             |
| C  | -9.83833300  | -5.00560700 | -0.49747600 | <b>20</b> |             |             |             |
| C  | -8.66415500  | -5.68974500 | -0.47653500 | C         | 2.45867100  | -0.71288400 | 0.00009300  |
| C  | -11.09665200 | -1.43488400 | -0.51909800 | C         | 1.23243100  | -1.42221000 | 0.00034100  |
| C  | -11.09680200 | 1.43415600  | -0.51947600 | C         | 2.45866800  | 0.71288300  | 0.00029200  |
| C  | -12.31514900 | 0.68427300  | -0.55295300 | C         | -0.00003100 | -0.71115400 | -0.00001800 |
| C  | -11.07175600 | 2.84363400  | -0.52100800 | C         | 1.23243100  | 1.42221300  | 0.00004600  |
| C  | -12.31507600 | -0.68513800 | -0.55277200 | C         | -0.00002800 | 0.71115200  | 0.00046100  |
| C  | -9.87644100  | 3.56193200  | -0.49169100 | C         | -1.23242400 | -1.42217600 | 0.00034500  |
| C  | -8.66471400  | 5.68931500  | -0.47784500 | C         | -1.23220900 | -2.85224200 | 0.00000500  |
| C  | -9.83883500  | 5.00504100  | -0.49869100 | C         | 1.23223300  | -2.85224600 | 0.00007300  |
| H  | -8.66329600  | -6.77701200 | -0.48540300 | C         | -0.00001300 | -3.56205300 | 0.00009400  |
| H  | -10.78377900 | -5.54216600 | -0.52337800 | C         | 1.23223300  | 2.85224600  | 0.00022100  |
| H  | -12.01450500 | -3.38635200 | -0.54792700 | C         | 2.46183300  | 3.55963700  | 0.00003500  |
| H  | -13.25604000 | -1.22936100 | -0.57988800 | C         | 3.69464800  | 1.42626300  | 0.00005900  |
| H  | -13.25617000 | 1.22839500  | -0.58021400 | C         | 3.69338300  | 2.84766500  | 0.00004000  |
| H  | -12.01486300 | 3.38553300  | -0.54879400 | C         | -2.45866000 | -0.71284500 | -0.00009000 |
| H  | -10.78433700 | 5.54151400  | -0.52473900 | C         | -2.45866000 | 0.71284500  | 0.00031600  |
| H  | -8.66396000  | 6.77660100  | -0.48693100 | C         | -1.23242300 | 1.42217700  | -0.00007500 |
| Cr | -6.18825300  | 0.00020200  | 1.32029600  | C         | -0.00001200 | 3.56205200  | 0.00002900  |
| C  | -5.51927400  | 1.22907300  | 2.96548000  | C         | -1.23220800 | 2.85224200  | 0.00021700  |
| C  | -6.94060600  | 1.22897400  | 2.92616500  | C         | 4.92560600  | 0.71352000  | 0.00001200  |
| C  | -7.64989500  | 0.00115800  | 2.92235100  | C         | 4.92560600  | -0.71352000 | 0.00002300  |
| C  | -6.94127300  | -1.22704700 | 2.92700800  | C         | 3.69464800  | -1.42626400 | 0.00012000  |

|   |             |             |             |           |             |             |             |
|---|-------------|-------------|-------------|-----------|-------------|-------------|-------------|
| C | 2.46183300  | -3.55963700 | 0.00005100  | H         | -5.84678400 | 5.53633000  | -0.00010900 |
| C | 3.69338300  | -2.84766600 | 0.00004300  | C         | -7.38250000 | 0.68342700  | -0.00012000 |
| C | -2.46180500 | 3.55963400  | -0.00001600 | C         | -7.38250000 | -0.68342400 | -0.00010100 |
| C | -2.45516500 | 4.99787100  | -0.00003700 | H         | -8.32254400 | 1.22984600  | -0.00013600 |
| C | -1.24126300 | 5.67718000  | -0.00003000 | H         | -8.32254400 | -1.22984300 | -0.00015300 |
| C | 2.45512700  | 4.99793000  | -0.00001900 | H         | -3.72187300 | 6.76861500  | -0.00012700 |
| C | 3.72506800  | 5.68136000  | -0.00008400 | H         | -1.24110000 | 6.76511600  | -0.00010200 |
| C | 1.24131000  | 5.67719500  | -0.00001900 | H         | 1.24104800  | 6.76513200  | -0.00007200 |
| C | 4.93941700  | 3.55766700  | -0.00007000 | H         | 3.72190900  | 6.76864500  | -0.00011400 |
| C | 4.90167600  | 4.99868800  | -0.00012800 | H         | 5.84678400  | 5.53638200  | -0.00016900 |
| C | -0.00002700 | 4.99657300  | 0.00000900  | H         | 7.07892100  | 3.38131700  | -0.00019900 |
| C | -2.46180700 | -3.55963500 | 0.00005400  | H         | 8.32253300  | 1.22979900  | -0.00022900 |
| C | -2.45516500 | -4.99787200 | -0.00003900 | H         | 8.32253300  | -1.22979700 | -0.00017300 |
| C | 4.93941700  | -3.55766800 | -0.00002600 | H         | 7.07892100  | -3.38131700 | -0.00010100 |
| C | 4.90167400  | -4.99868900 | -0.00007000 | H         | 5.84678200  | -5.53638300 | -0.00010000 |
| C | -0.00002800 | -4.99657500 | -0.00002700 | H         | 3.72190800  | -6.76864700 | -0.00012800 |
| C | -1.24126400 | -5.67718200 | -0.00009800 | H         | 1.24104700  | -6.76513300 | -0.00012000 |
| C | 1.24130900  | -5.67719600 | -0.00009100 | H         | -1.24110200 | -6.76511800 | -0.00012000 |
| C | 2.45512600  | -4.99793000 | -0.00003100 | H         | -3.72187400 | -6.76861600 | -0.00009400 |
| C | 3.72506700  | -5.68136200 | -0.00009100 |           |             |             |             |
| C | -3.69465900 | 1.42624500  | -0.00005700 | <b>21</b> |             |             |             |
| C | -3.69340700 | 2.84764500  | 0.00005400  | C         | -2.28221700 | 0.71723900  | -0.40542900 |
| C | -4.92559000 | 0.71352300  | 0.00003300  | C         | -1.05240300 | 1.42881600  | -0.34854500 |
| C | -3.69340800 | -2.84764400 | -0.00001600 | C         | -2.28171000 | -0.71914200 | -0.39484100 |
| C | -3.69466000 | -1.42624400 | 0.00013400  | C         | 0.19099400  | 0.71250300  | -0.32290200 |
| C | -4.92559000 | -0.71352100 | -0.00004000 | C         | -1.05146700 | -1.43116000 | -0.35651700 |
| C | 6.13549100  | 2.83919500  | -0.00015100 | C         | 0.19041100  | -0.71333700 | -0.31110000 |
| C | 6.16019000  | 1.43142200  | -0.00010000 | Cr        | -1.12512300 | 0.00227600  | 1.52314000  |
| C | 7.38244700  | 0.68345800  | -0.00016400 | C         | -0.48537900 | 1.33184600  | 2.61399600  |
| C | 6.13549100  | -2.83919600 | -0.00006200 | C         | -2.66000800 | -0.06165900 | 2.52251500  |
| C | 6.16019000  | -1.43142200 | -0.00006200 | C         | -0.37027800 | -1.25958000 | 2.62167400  |
| C | 7.38244600  | -0.68345600 | -0.00012900 | O         | 0.11432200  | -2.06908400 | 3.30239400  |
| C | -4.93935800 | -3.55766900 | -0.00003900 | O         | -3.64612800 | -0.10247600 | 3.13910400  |
| C | -6.13551200 | -2.83913900 | -0.00005700 | O         | -0.07566800 | 2.18539400  | 3.29020300  |
| C | -4.90167500 | -4.99864200 | -0.00006400 | C         | 1.42868900  | 1.42776200  | -0.29818500 |
| C | -4.93935700 | 3.55767000  | -0.00005200 | C         | 1.41976100  | 2.85520700  | -0.32190100 |
| C | -6.13551100 | 2.83914000  | -0.00010600 | C         | -1.05060800 | 2.86669700  | -0.38255400 |
| C | -4.90167400 | 4.99864300  | -0.00010300 | C         | 0.18305100  | 3.56690400  | -0.35922600 |
| C | -3.72503600 | -5.68133400 | -0.00008500 | C         | -1.04950500 | -2.86852400 | -0.37705600 |
| C | -6.16019300 | -1.43145700 | -0.00006400 | C         | -2.27576800 | -3.56720600 | -0.44202500 |
| H | -5.84678400 | -5.53633100 | -0.00009300 | C         | -3.52288900 | -1.43664600 | -0.47060300 |
| H | -7.07890000 | -3.38133500 | -0.00011800 | C         | -3.51290900 | -2.85208600 | -0.48640400 |
| C | -6.16019300 | 1.43145900  | -0.00006400 | C         | 2.64589000  | 0.71564200  | -0.28337800 |
| C | -3.72503500 | 5.68133300  | -0.00007700 | C         | 2.64591200  | -0.71571300 | -0.27958900 |
| H | -7.07889900 | 3.38133800  | -0.00010800 | C         | 1.42931300  | -1.42834400 | -0.30153700 |

|   |             |             |             |              |             |             |             |
|---|-------------|-------------|-------------|--------------|-------------|-------------|-------------|
| C | 0.18472100  | -3.56827000 | -0.35820700 | H            | 6.03104700  | 5.53911300  | -0.24850700 |
| C | 1.42084600  | -2.85572200 | -0.31747800 | H            | 7.26288600  | 3.38322000  | -0.21309300 |
| C | -4.74393000 | -0.71833800 | -0.53471500 | C            | 6.34559400  | -1.43048000 | -0.22404200 |
| C | -4.74441600 | 0.71520400  | -0.53600700 | C            | 3.91323300  | -5.68369900 | -0.29746500 |
| C | -3.52370800 | 1.43406400  | -0.46846400 | H            | 7.26430100  | -3.38112700 | -0.21447600 |
| C | -2.27721000 | 3.56479100  | -0.44280800 | H            | 6.03351800  | -5.53758000 | -0.24978200 |
| C | -3.51424100 | 2.84958100  | -0.48863700 | C            | 7.56756300  | -0.68246800 | -0.20106200 |
| C | 2.64835600  | -3.56178300 | -0.30308900 | C            | 7.56730500  | 0.68460500  | -0.20058900 |
| C | 2.64202500  | -5.00139700 | -0.31932600 | H            | 8.50757600  | -1.22841400 | -0.18351500 |
| C | 1.43053500  | -5.68072400 | -0.35772700 | H            | 8.50710600  | 1.23090700  | -0.18297700 |
| C | -2.26887400 | -5.00400400 | -0.46518800 | H            | 3.91116700  | -6.77077900 | -0.30591000 |
| C | -3.53867000 | -5.68656900 | -0.52689200 | H            | 1.43124200  | -6.76837000 | -0.37166200 |
| C | -1.05370300 | -5.68187400 | -0.43104000 | H            | -1.05215900 | -6.76949900 | -0.44665700 |
| C | -4.75502300 | -3.56268500 | -0.55585900 | H            | -3.53549000 | -6.77358900 | -0.53969700 |
| C | -4.71459500 | -5.00440700 | -0.57008100 | H            | -5.65783900 | -5.54288600 | -0.61732200 |
| C | 0.18640000  | -5.00108900 | -0.38133400 | H            | -6.89197100 | -3.38440000 | -0.66005900 |
| C | 2.64679500  | 3.56176300  | -0.30379700 | H            | -8.13610900 | -1.23123600 | -0.71461100 |
| C | 2.63987100  | 5.00140300  | -0.32060300 | H            | -8.13685600 | 1.22642100  | -0.71403600 |
| C | -4.75669500 | 3.55957600  | -0.55589900 | H            | -6.89373400 | 3.38044700  | -0.65881900 |
| C | -4.71676500 | 5.00134500  | -0.56990300 | H            | -5.66018100 | 5.53955200  | -0.61672600 |
| C | 0.18429000  | 4.99975600  | -0.38405700 | H            | -3.53811900 | 6.77086400  | -0.54075800 |
| C | 1.42805900  | 5.68002700  | -0.36047900 | H            | -1.05496900 | 6.76755100  | -0.44927300 |
| C | -1.05604600 | 5.67990600  | -0.43415700 | H            | 1.42814100  | 6.76768300  | -0.37386500 |
| C | -2.27095900 | 5.00168000  | -0.46727100 | H            | 3.90819600  | 6.77137700  | -0.30606600 |
| C | -3.54098200 | 5.68383900  | -0.52834000 |              |             |             |             |
| C | 3.88259000  | -1.42808900 | -0.26610100 | <b>22-ts</b> |             |             |             |
| C | 3.88005600  | -2.84842300 | -0.27317500 | C            | 1.31011700  | 1.50078400  | -0.36537700 |
| C | 5.11223000  | -0.71350300 | -0.24346400 | C            | 2.52929800  | 0.77898900  | -0.36866400 |
| C | 3.87892100  | 2.84897100  | -0.27401000 | C            | 0.06868500  | 0.80148200  | -0.36775500 |
| C | 3.88199900  | 1.42860800  | -0.26498100 | C            | 2.51862100  | -0.64650800 | -0.38635500 |
| C | 5.11199800  | 0.71460700  | -0.24361000 | C            | 0.05613000  | -0.62921800 | -0.41580100 |
| C | -5.94995900 | -2.84253600 | -0.60987500 | C            | 1.28790200  | -1.35344800 | -0.38470500 |
| C | -5.97563600 | -1.43493000 | -0.60366400 | Cr           | -0.38794000 | -0.49385600 | 1.83869300  |
| C | -7.19750500 | -0.68489400 | -0.66639100 | C            | 0.95197300  | 0.14462200  | 2.89434000  |
| C | -5.95149500 | 2.83899300  | -0.60876400 | C            | -1.64587900 | 0.29997100  | 2.89513600  |
| C | -5.97642500 | 1.43128200  | -0.60320200 | C            | -0.46743700 | -2.01682500 | 2.83432200  |
| C | -7.19795000 | 0.68061300  | -0.66574400 | O            | -0.50532400 | -3.00054700 | 3.46018000  |
| C | 5.12467900  | 3.55953000  | -0.25485400 | O            | -2.45918400 | 0.81544000  | 3.55331300  |
| C | 6.31958800  | 2.84132300  | -0.22860000 | O            | 1.82395300  | 0.54632700  | 3.55695200  |
| C | 5.08622600  | 5.00144300  | -0.26578000 | C            | 3.74692800  | -1.37008300 | -0.39575200 |
| C | 5.12622200  | -3.55845200 | -0.25530100 | C            | 4.98253100  | -0.66556500 | -0.38274200 |
| C | 6.32075200  | -2.83965200 | -0.22988200 | C            | 3.76882700  | 1.48320200  | -0.35939100 |
| C | 5.08844600  | -5.00033600 | -0.26655800 | C            | 4.99345500  | 0.76073300  | -0.36144800 |
| C | 3.91074900  | 5.68429600  | -0.29791000 | C            | -1.18749100 | -1.33943500 | -0.42889200 |
| C | 6.34502500  | 1.43213800  | -0.22353700 | C            | -2.40928900 | -0.61286500 | -0.43474500 |

|   |             |             |             |    |             |             |             |
|---|-------------|-------------|-------------|----|-------------|-------------|-------------|
| C | -1.16547500 | 1.51948100  | -0.38483600 | C  | -6.05330000 | 2.96666900  | -0.44964700 |
| C | -2.39778800 | 0.81681200  | -0.42221800 | C  | -6.09448700 | -2.71039800 | -0.57217500 |
| C | 3.73335600  | -2.79163600 | -0.43254900 | C  | -4.87680100 | -4.87978800 | -0.62794600 |
| C | 2.49706400  | -3.49702900 | -0.46575200 | C  | 4.99991600  | 5.04592200  | -0.30643800 |
| C | 1.27264600  | -2.78454000 | -0.45497700 | C  | 4.92664100  | -4.95031100 | -0.48804900 |
| C | -1.19335600 | -2.77152000 | -0.49645600 | C  | -3.70609100 | -5.57233000 | -0.63921000 |
| C | 0.03581000  | -3.48549900 | -0.50772800 | C  | -7.32764500 | -0.54607100 | -0.53719100 |
| C | -1.15189800 | 2.94843100  | -0.36832900 | C  | -7.31684300 | 0.82037900  | -0.50748800 |
| C | 0.08706100  | 3.64561800  | -0.35049900 | C  | -3.62464800 | 5.79285600  | -0.37172000 |
| C | 1.31615200  | 2.92848100  | -0.34762500 | H  | -5.74672800 | 5.66222000  | -0.40198300 |
| C | 3.77688200  | 2.90438000  | -0.33962500 | H  | -3.61431300 | 6.87977400  | -0.35574400 |
| C | 2.55089200  | 3.62605900  | -0.33636300 | H  | -1.13143500 | 6.85643500  | -0.32746300 |
| C | -3.64891500 | -1.31921900 | -0.47999100 | H  | 1.35093200  | 6.83824900  | -0.30647900 |
| C | -4.87212200 | -0.59480000 | -0.49039900 | H  | 3.83342500  | 6.82462900  | -0.28974500 |
| C | -3.65388700 | -2.73929000 | -0.53068100 | H  | 5.94864200  | 5.57669700  | -0.29295100 |
| C | -4.86094700 | 0.83177500  | -0.46396800 | H  | 7.16552700  | 3.41199300  | -0.31473900 |
| C | -2.42724800 | -3.46368600 | -0.54011200 | H  | 8.39394000  | 1.25085300  | -0.33543100 |
| C | -3.62526200 | 1.53708400  | -0.43359400 | H  | 8.37513800  | -1.20801700 | -0.37507000 |
| C | -3.61238900 | 2.95900100  | -0.41064600 | H  | 7.11377100  | -3.34899700 | -0.42743000 |
| C | -2.37720900 | 3.66247300  | -0.38052700 | H  | 5.86838700  | -5.49348600 | -0.49256300 |
| C | -4.85305100 | 3.67740500  | -0.41934900 | H  | 3.73732600  | -6.71206600 | -0.56136200 |
| C | -2.35961000 | 5.10037300  | -0.36338000 | H  | 1.25687300  | -6.69205300 | -0.60800400 |
| C | 0.09746100  | 5.07967800  | -0.33572900 | H  | -1.22818700 | -6.67449300 | -0.64931900 |
| C | 2.55388800  | 5.06346900  | -0.31968300 | H  | -3.71232700 | -6.65865200 | -0.67807600 |
| C | 5.02733900  | 3.60498100  | -0.32459700 | H  | -5.82583900 | -5.40915400 | -0.65911100 |
| C | 6.23311100  | 1.46943700  | -0.34596000 | H  | -7.04129400 | -3.24532200 | -0.60442800 |
| C | 6.21118700  | -1.39279700 | -0.39091200 | H  | -8.27158500 | -1.08455900 | -0.56522600 |
| C | 4.97335700  | -3.50995900 | -0.44467600 | H  | -8.25238800 | 1.37405600  | -0.51092600 |
| C | 2.48097200  | -4.93451700 | -0.52180600 | H  | -6.99277500 | 3.51520600  | -0.45518900 |
| C | 0.02570000  | -4.91721900 | -0.56534300 |    |             |             |             |
| C | -2.43061700 | -4.90076600 | -0.59742400 | 23 |             |             |             |
| C | -4.90403300 | -3.43919100 | -0.57606100 | C  | -2.46447200 | 0.82419200  | -0.37657000 |
| C | -6.11101600 | -1.30316100 | -0.53277100 | C  | -1.23809400 | 1.53474700  | -0.34130400 |
| C | -6.08885600 | 1.55857700  | -0.47258200 | C  | -2.46595300 | -0.60297600 | -0.40211500 |
| C | -1.22105300 | -5.58758400 | -0.60994400 | C  | 0.00014400  | 0.82770600  | -0.32136400 |
| C | 1.26333100  | -5.60507600 | -0.56991000 | C  | -1.24125200 | -1.32138900 | -0.38486400 |
| C | 3.74667200  | -5.62560500 | -0.52682000 | C  | 0.00012600  | -0.60482900 | -0.37134300 |
| C | 6.17475700  | -2.79958000 | -0.41990400 | Cr | -0.00071500 | -0.66444200 | 1.85568200  |
| C | 7.43947300  | -0.65448100 | -0.37187200 | C  | -1.30528800 | 0.05849700  | 2.90822300  |
| C | 7.44984900  | 0.71201000  | -0.35033300 | C  | -0.00099100 | -2.19658900 | 2.84915200  |
| C | 6.21836900  | 2.87691800  | -0.32809200 | C  | 1.30378600  | 0.05818700  | 2.90854800  |
| C | 3.82833000  | 5.73763600  | -0.30426000 | O  | 2.14671300  | 0.52526900  | 3.56492600  |
| C | 1.34361400  | 5.75058100  | -0.31922800 | O  | -0.00111300 | -3.18464300 | 3.46816500  |
| C | -1.14017700 | 5.76876200  | -0.34065600 | O  | -2.14823600 | 0.52586600  | 3.56437500  |
| C | -4.80549600 | 5.11821300  | -0.39762600 | C  | 1.23839900  | 1.53469900  | -0.34126200 |

|   |             |             |             |              |             |             |             |
|---|-------------|-------------|-------------|--------------|-------------|-------------|-------------|
| C | 1.23474900  | 2.96279100  | -0.32326400 | C            | -6.16191500 | 1.54200200  | -0.42109400 |
| C | -1.23438600 | 2.96283900  | -0.32332400 | C            | -7.38410200 | 0.79446800  | -0.45668100 |
| C | 0.00019600  | 3.66978800  | -0.31116500 | C            | 4.94130600  | 3.66799100  | -0.35926600 |
| C | -1.23403400 | -2.75200200 | -0.47184900 | C            | 6.13727700  | 2.94957300  | -0.39022100 |
| C | -2.46359500 | -3.45405000 | -0.51897800 | C            | 4.90312900  | 5.10877900  | -0.33075600 |
| C | -3.69889300 | -1.31702700 | -0.44897000 | C            | 4.93980400  | -3.44701000 | -0.54859300 |
| C | -3.69425100 | -2.73831700 | -0.50247800 | C            | 6.13536600  | -2.72695700 | -0.53958100 |
| C | 2.46474800  | 0.82409400  | -0.37642500 | C            | 4.90270500  | -4.88710800 | -0.60859500 |
| C | 2.46617900  | -0.60306400 | -0.40202800 | C            | 3.72656100  | 5.79119200  | -0.30601000 |
| C | 1.24145000  | -1.32143100 | -0.38483400 | C            | 6.16222900  | 1.54176700  | -0.42080500 |
| C | 0.00006200  | -3.45955000 | -0.51209700 | H            | 5.84788200  | 5.64672800  | -0.32926500 |
| C | 1.23417700  | -2.75204200 | -0.47181400 | H            | 7.08050200  | 3.49164600  | -0.39039800 |
| C | -4.92851700 | -0.60225400 | -0.45369900 | C            | 6.16216400  | -1.31991800 | -0.49480100 |
| C | -4.92822500 | 0.82382100  | -0.41897100 | C            | 3.72739600  | -5.57137100 | -0.63142300 |
| C | -3.69759600 | 1.53666400  | -0.38664800 | H            | 7.07831900  | -3.26867000 | -0.57256000 |
| C | -2.46446000 | 3.66947700  | -0.32882200 | H            | 5.84822300  | -5.42283500 | -0.63891500 |
| C | -3.69541200 | 2.95807500  | -0.35709700 | C            | 7.38457700  | -0.57228400 | -0.49222400 |
| C | 2.46371300  | -3.45414100 | -0.51888100 | C            | 7.38438700  | 0.79418500  | -0.45634600 |
| C | 2.45660100  | -4.89079300 | -0.59233200 | H            | 8.32442600  | -1.11796800 | -0.51996400 |
| C | 1.24260100  | -5.56871800 | -0.62529200 | H            | 8.32433400  | 1.34040900  | -0.45456700 |
| C | -2.45653200 | -4.89070500 | -0.59243000 | H            | 3.72606100  | -6.65736200 | -0.67903300 |
| C | -3.72735500 | -5.57123200 | -0.63157600 | H            | 1.24244500  | -6.65508500 | -0.67770700 |
| C | -1.24255800 | -5.56867200 | -0.62533700 | H            | -1.24243600 | -6.65503900 | -0.67775300 |
| C | -4.93968500 | -3.44682400 | -0.54879300 | H            | -3.72605900 | -6.65722300 | -0.67919300 |
| C | -4.90263500 | -4.88692400 | -0.60879600 | H            | -5.84817500 | -5.42261200 | -0.63915600 |
| C | 0.00003600  | -4.88953200 | -0.58995400 | H            | -7.07819000 | -3.26839800 | -0.57284400 |
| C | 2.46484700  | 3.66938400  | -0.32870900 | H            | -8.32421200 | -1.11764900 | -0.52031700 |
| C | 2.45714900  | 5.10706100  | -0.30618000 | H            | -8.32402600 | 1.34073200  | -0.45495000 |
| C | -4.94091700 | 3.66818200  | -0.35951100 | H            | -7.08011400 | 3.49191800  | -0.39075000 |
| C | -4.90268300 | 5.10896900  | -0.33099600 | H            | -5.84741800 | 5.64695200  | -0.32955600 |
| C | 0.00022300  | 5.10366100  | -0.29338200 | H            | -3.72283500 | 6.87824100  | -0.28548200 |
| C | 1.24201500  | 5.78407400  | -0.28740100 | H            | -1.24031900 | 6.87180700  | -0.27124100 |
| C | -1.24155100 | 5.78412100  | -0.28746000 | H            | 1.24083000  | 6.87176000  | -0.27118600 |
| C | -2.45670600 | 5.10715900  | -0.30629700 | H            | 3.72334200  | 6.87809500  | -0.28530600 |
| C | -3.72609400 | 5.79133800  | -0.30619000 |              |             |             |             |
| C | 3.69909200  | -1.31716500 | -0.44881400 | <b>24-ts</b> |             |             |             |
| C | 3.69439700  | -2.73845600 | -0.50233400 | C            | 1.31011700  | 1.50078400  | -0.36537700 |
| C | 4.92874500  | -0.60244200 | -0.45349500 | C            | 2.52929800  | 0.77898900  | -0.36866400 |
| C | 3.69577900  | 2.95793100  | -0.35690700 | C            | 0.06868500  | 0.80148200  | -0.36775500 |
| C | 3.69790900  | 1.53652400  | -0.38647200 | C            | 2.51862100  | -0.64650800 | -0.38635500 |
| C | 4.92850500  | 0.82363200  | -0.41873500 | C            | 0.05613000  | -0.62921800 | -0.41580100 |
| C | -6.13521500 | -2.72672400 | -0.53983200 | C            | 1.28790200  | -1.35344800 | -0.38470500 |
| C | -6.16196000 | -1.31968100 | -0.49505900 | Cr           | -0.38794000 | -0.49385600 | 1.83869300  |
| C | -7.38434400 | -0.57200000 | -0.49254600 | C            | 0.95197300  | 0.14462200  | 2.89434000  |
| C | -6.13690900 | 2.94981100  | -0.39052200 | C            | -1.64587900 | 0.29997100  | 2.89513600  |

|   |             |             |             |           |             |             |             |
|---|-------------|-------------|-------------|-----------|-------------|-------------|-------------|
| C | -0.46743700 | -2.01682500 | 2.83432200  | C         | 1.26333100  | -5.60507600 | -0.56991000 |
| O | -0.50532400 | -3.00054700 | 3.46018000  | C         | 3.74667200  | -5.62560500 | -0.52682000 |
| O | -2.45918400 | 0.81544000  | 3.55331300  | C         | 6.17475700  | -2.79958000 | -0.41990400 |
| O | 1.82395300  | 0.54632700  | 3.55695200  | C         | 7.43947300  | -0.65448100 | -0.37187200 |
| C | 3.74692800  | -1.37008300 | -0.39575200 | C         | 7.44984900  | 0.71201000  | -0.35033300 |
| C | 4.98253100  | -0.66556500 | -0.38274200 | C         | 6.21836900  | 2.87691800  | -0.32809200 |
| C | 3.76882700  | 1.48320200  | -0.35939100 | C         | 3.82833000  | 5.73763600  | -0.30426000 |
| C | 4.99345500  | 0.76073300  | -0.36144800 | C         | 1.34361400  | 5.75058100  | -0.31922800 |
| C | -1.18749100 | -1.33943500 | -0.42889200 | C         | -1.14017700 | 5.76876200  | -0.34065600 |
| C | -2.40928900 | -0.61286500 | -0.43474500 | C         | -4.80549600 | 5.11821300  | -0.39762600 |
| C | -1.16547500 | 1.51948100  | -0.38483600 | C         | -6.05330000 | 2.96666900  | -0.44964700 |
| C | -2.39778800 | 0.81681200  | -0.42221800 | C         | -6.09448700 | -2.71039800 | -0.57217500 |
| C | 3.73335600  | -2.79163600 | -0.43254900 | C         | -4.87680100 | -4.87978800 | -0.62794600 |
| C | 2.49706400  | -3.49702900 | -0.46575200 | C         | 4.99991600  | 5.04592200  | -0.30643800 |
| C | 1.27264600  | -2.78454000 | -0.45497700 | C         | 4.92664100  | -4.95031100 | -0.48804900 |
| C | -1.19335600 | -2.77152000 | -0.49645600 | C         | -3.70609100 | -5.57233000 | -0.63921000 |
| C | 0.03581000  | -3.48549900 | -0.50772800 | C         | -7.32764500 | -0.54607100 | -0.53719100 |
| C | -1.15189800 | 2.94843100  | -0.36832900 | C         | -7.31684300 | 0.82037900  | -0.50748800 |
| C | 0.08706100  | 3.64561800  | -0.35049900 | C         | -3.62464800 | 5.79285600  | -0.37172000 |
| C | 1.31615200  | 2.92848100  | -0.34762500 | H         | -5.74672800 | 5.66222000  | -0.40198300 |
| C | 3.77688200  | 2.90438000  | -0.33962500 | H         | -3.61431300 | 6.87977400  | -0.35574400 |
| C | 2.55089200  | 3.62605900  | -0.33636300 | H         | -1.13143500 | 6.85643500  | -0.32746300 |
| C | -3.64891500 | -1.31921900 | -0.47999100 | H         | 1.35093200  | 6.83824900  | -0.30647900 |
| C | -4.87212200 | -0.59480000 | -0.49039900 | H         | 3.83342500  | 6.82462900  | -0.28974500 |
| C | -3.65388700 | -2.73929000 | -0.53068100 | H         | 5.94864200  | 5.57669700  | -0.29295100 |
| C | -4.86094700 | 0.83177500  | -0.46396800 | H         | 7.16552700  | 3.41199300  | -0.31473900 |
| C | -2.42724800 | -3.46368600 | -0.54011200 | H         | 8.39394000  | 1.25085300  | -0.33543100 |
| C | -3.62526200 | 1.53708400  | -0.43359400 | H         | 8.37513800  | -1.20801700 | -0.37507000 |
| C | -3.61238900 | 2.95900100  | -0.41064600 | H         | 7.11377100  | -3.34899700 | -0.42743000 |
| C | -2.37720900 | 3.66247300  | -0.38052700 | H         | 5.86838700  | -5.49348600 | -0.49256300 |
| C | -4.85305100 | 3.67740500  | -0.41934900 | H         | 3.73732600  | -6.71206600 | -0.56136200 |
| C | -2.35961000 | 5.10037300  | -0.36338000 | H         | 1.25687300  | -6.69205300 | -0.60800400 |
| C | 0.09746100  | 5.07967800  | -0.33572900 | H         | -1.22818700 | -6.67449300 | -0.64931900 |
| C | 2.55388800  | 5.06346900  | -0.31968300 | H         | -3.71232700 | -6.65865200 | -0.67807600 |
| C | 5.02733900  | 3.60498100  | -0.32459700 | H         | -5.82583900 | -5.40915400 | -0.65911100 |
| C | 6.23311100  | 1.46943700  | -0.34596000 | H         | -7.04129400 | -3.24532200 | -0.60442800 |
| C | 6.21118700  | -1.39279700 | -0.39091200 | H         | -8.27158500 | -1.08455900 | -0.56522600 |
| C | 4.97335700  | -3.50995900 | -0.44467600 | H         | -8.25238800 | 1.37405600  | -0.51092600 |
| C | 2.48097200  | -4.93451700 | -0.52180600 | H         | -6.99277500 | 3.51520600  | -0.45518900 |
| C | 0.02570000  | -4.91721900 | -0.56534300 |           |             |             |             |
| C | -2.43061700 | -4.90076600 | -0.59742400 | <b>25</b> |             |             |             |
| C | -4.90403300 | -3.43919100 | -0.57606100 | C         | -2.28221700 | 0.71723900  | -0.40542900 |
| C | -6.11101600 | -1.30316100 | -0.53277100 | C         | -1.05240300 | 1.42881600  | -0.34854500 |
| C | -6.08885600 | 1.55857700  | -0.47258200 | C         | -2.28171000 | -0.71914200 | -0.39484100 |
| C | -1.22105300 | -5.58758400 | -0.60994400 | C         | 0.19099400  | 0.71250300  | -0.32290200 |

|    |             |             |             |   |             |             |             |
|----|-------------|-------------|-------------|---|-------------|-------------|-------------|
| C  | -1.05146700 | -1.43116000 | -0.35651700 | C | 3.88259000  | -1.42808900 | -0.26610100 |
| C  | 0.19041100  | -0.71333700 | -0.31110000 | C | 3.88005600  | -2.84842300 | -0.27317500 |
| Cr | -1.12512300 | 0.00227600  | 1.52314000  | C | 5.11223000  | -0.71350300 | -0.24346400 |
| C  | -0.48537900 | 1.33184600  | 2.61399600  | C | 3.87892100  | 2.84897100  | -0.27401000 |
| C  | -2.66000800 | -0.06165900 | 2.52251500  | C | 3.88199900  | 1.42860800  | -0.26498100 |
| C  | -0.37027800 | -1.25958000 | 2.62167400  | C | 5.11199800  | 0.71460700  | -0.24361000 |
| O  | 0.11432200  | -2.06908400 | 3.30239400  | C | -5.94995900 | -2.84253600 | -0.60987500 |
| O  | -3.64612800 | -0.10247600 | 3.13910400  | C | -5.97563600 | -1.43493000 | -0.60366400 |
| O  | -0.07566800 | 2.18539400  | 3.29020300  | C | -7.19750500 | -0.68489400 | -0.66639100 |
| C  | 1.42868900  | 1.42776200  | -0.29818500 | C | -5.95149500 | 2.83899300  | -0.60876400 |
| C  | 1.41976100  | 2.85520700  | -0.32190100 | C | -5.97642500 | 1.43128200  | -0.60320200 |
| C  | -1.05060800 | 2.86669700  | -0.38255400 | C | -7.19795000 | 0.68061300  | -0.66574400 |
| C  | 0.18305100  | 3.56690400  | -0.35922600 | C | 5.12467900  | 3.55953000  | -0.25485400 |
| C  | -1.04950500 | -2.86852400 | -0.37705600 | C | 6.31958800  | 2.84132300  | -0.22860000 |
| C  | -2.27576800 | -3.56720600 | -0.44202500 | C | 5.08622600  | 5.00144300  | -0.26578000 |
| C  | -3.52288900 | -1.43664600 | -0.47060300 | C | 5.12622200  | -3.55845200 | -0.25530100 |
| C  | -3.51290900 | -2.85208600 | -0.48640400 | C | 6.32075200  | -2.83965200 | -0.22988200 |
| C  | 2.64589000  | 0.71564200  | -0.28337800 | C | 5.08844600  | -5.00033600 | -0.26655800 |
| C  | 2.64591200  | -0.71571300 | -0.27958900 | C | 3.91074900  | 5.68429600  | -0.29791000 |
| C  | 1.42931300  | -1.42834400 | -0.30153700 | C | 6.34502500  | 1.43213800  | -0.22353700 |
| C  | 0.18472100  | -3.56827000 | -0.35820700 | H | 6.03104700  | 5.53911300  | -0.24850700 |
| C  | 1.42084600  | -2.85572200 | -0.31747800 | H | 7.26288600  | 3.38322000  | -0.21309300 |
| C  | -4.74393000 | -0.71833800 | -0.53471500 | C | 6.34559400  | -1.43048000 | -0.22404200 |
| C  | -4.74441600 | 0.71520400  | -0.53600700 | C | 3.91323300  | -5.68369900 | -0.29746500 |
| C  | -3.52370800 | 1.43406400  | -0.46846400 | H | 7.26430100  | -3.38112700 | -0.21447600 |
| C  | -2.27721000 | 3.56479100  | -0.44280800 | H | 6.03351800  | -5.53758000 | -0.24978200 |
| C  | -3.51424100 | 2.84958100  | -0.48863700 | C | 7.56756300  | -0.68246800 | -0.20106200 |
| C  | 2.64835600  | -3.56178300 | -0.30308900 | C | 7.56730500  | 0.68460500  | -0.20058900 |
| C  | 2.64202500  | -5.00139700 | -0.31932600 | H | 8.50757600  | -1.22841400 | -0.18351500 |
| C  | 1.43053500  | -5.68072400 | -0.35772700 | H | 8.50710600  | 1.23090700  | -0.18297700 |
| C  | -2.26887400 | -5.00400400 | -0.46518800 | H | 3.91116700  | -6.77077900 | -0.30591000 |
| C  | -3.53867000 | -5.68656900 | -0.52689200 | H | 1.43124200  | -6.76837000 | -0.37166200 |
| C  | -1.05370300 | -5.68187400 | -0.43104000 | H | -1.05215900 | -6.76949900 | -0.44665700 |
| C  | -4.75502300 | -3.56268500 | -0.55585900 | H | -3.53549000 | -6.77358900 | -0.53969700 |
| C  | -4.71459500 | -5.00440700 | -0.57008100 | H | -5.65783900 | -5.54288600 | -0.61732200 |
| C  | 0.18640000  | -5.00108900 | -0.38133400 | H | -6.89197100 | -3.38440000 | -0.66005900 |
| C  | 2.64679500  | 3.56176300  | -0.30379700 | H | -8.13610900 | -1.23123600 | -0.71461100 |
| C  | 2.63987100  | 5.00140300  | -0.32060300 | H | -8.13685600 | 1.22642100  | -0.71403600 |
| C  | -4.75669500 | 3.55957600  | -0.55589900 | H | -6.89373400 | 3.38044700  | -0.65881900 |
| C  | -4.71676500 | 5.00134500  | -0.56990300 | H | -5.66018100 | 5.53955200  | -0.61672600 |
| C  | 0.18429000  | 4.99975600  | -0.38405700 | H | -3.53811900 | 6.77086400  | -0.54075800 |
| C  | 1.42805900  | 5.68002700  | -0.36047900 | H | -1.05496900 | 6.76755100  | -0.44927300 |
| C  | -1.05604600 | 5.67990600  | -0.43415700 | H | 1.42814100  | 6.76768300  | -0.37386500 |
| C  | -2.27095900 | 5.00168000  | -0.46727100 | H | 3.90819600  | 6.77137700  | -0.30606600 |
| C  | -3.54098200 | 5.68383900  | -0.52834000 |   |             |             |             |



## Reference

---

- <sup>1</sup> Frisch, M. J.; Trucks, G. W.; Schlegel, H. B.; Scuseria, G. E.; Robb, M. A.; Cheeseman, J. R.; Scalmani, G.; Barone, V.; Mennucci, B.; Petersson, G. A.; Nakatsuji, H.; Caricato, M.; Li, X.; Hratchian, H. P.; Izmaylov, A. F.; Bloino, J.; Zheng, G.; Sonnenberg, J. L.; Hada, M.; Ehara, M.; Toyota, K.; Fukuda, R.; Hasegawa, J.; Ishida, M.; Nakajima, T.; Honda, Y.; Kitao, O.; Nakai, H.; Vreven, T.; Montgomery, J. A.; Peralta, J. E.; Ogliaro, F.; Bearpark, M.; Heyd, J. J.; Brothers, E.; Kudin, K. N.; Staroverov, V. N.; Kobayashi, R.; Normand, J.; Raghavachari, K.; Rendell, A.; Burant, J. C.; Iyengar, S. S.; Tomasi, J.; Cossi, M.; Rega, N.; Millam, J. M.; Klene, M.; Knox, J. E.; Cross, J. B.; Bakken, V.; Adamo, C.; Jaramillo, J.; Gomperts, R.; Stratmann, R. E.; Yazyev, O.; Austin, A. J.; Cammi, R.; Pomelli, C.; Ochterski, J. W.; Martin, R. L.; Morokuma, K.; Zakrzewski, V. G.; Voth, G. A.; Salvador, P.; Dannenberg, J. J.; Dapprich, S.; Daniels, A. D.; Farkas, O.; Foresman, J. B.; Ortiz, J. V.; Cioslowski, J.; Fox, D. J. *Gaussian 09*; Gaussian, Inc.: Wallingford, CT, 2009.
- <sup>2</sup> (a) Becke, A. D. *J. Chem. Phys.* **1993**, *98*, 5648. (b) Lee, C.; Yang, W.; Parr, R. G. *Phys. Rev. B* **1988**, *37*, 785.
- <sup>3</sup> Peverati, R.; Truhlar, D. G. *J. Phys. Chem. Lett.* **2011**, *2*, 2810.
- <sup>4</sup> (a) Peverati, R.; Truhlar, D. G. *Phys. Chem. Chem. Phys.* **2012**, *14*, 11363. (b) Lin, Y.-S.; Tsai, C.-W.; Li, G.-D.; Chai, J.-D. *J. Chem. Phys.* **2012**, *136*, 154109. (c) Steckel, J. A. *J. Phys. Chem. A* **2012**, *116*, 11643. (d) Zhao, Y.; Ng, H. T.; Peverati, R.; Truhlar, D. G. *J. Chem. Theory Comput.* **2012**, *8*, 2824.
